# Supplementary material for: DDK/Hsk1 phosphorylates and targets fission yeast histone deacetylase Hst4 for degradation to stabilize stalled DNA replication forks
Source: PubMed Central journal article supplement (PMC8565929; doi:10.7554/elife.70787), 2021-10-05

Figure 7-figure supplement 1-source data 1

Figure 7-figure supplement 1D

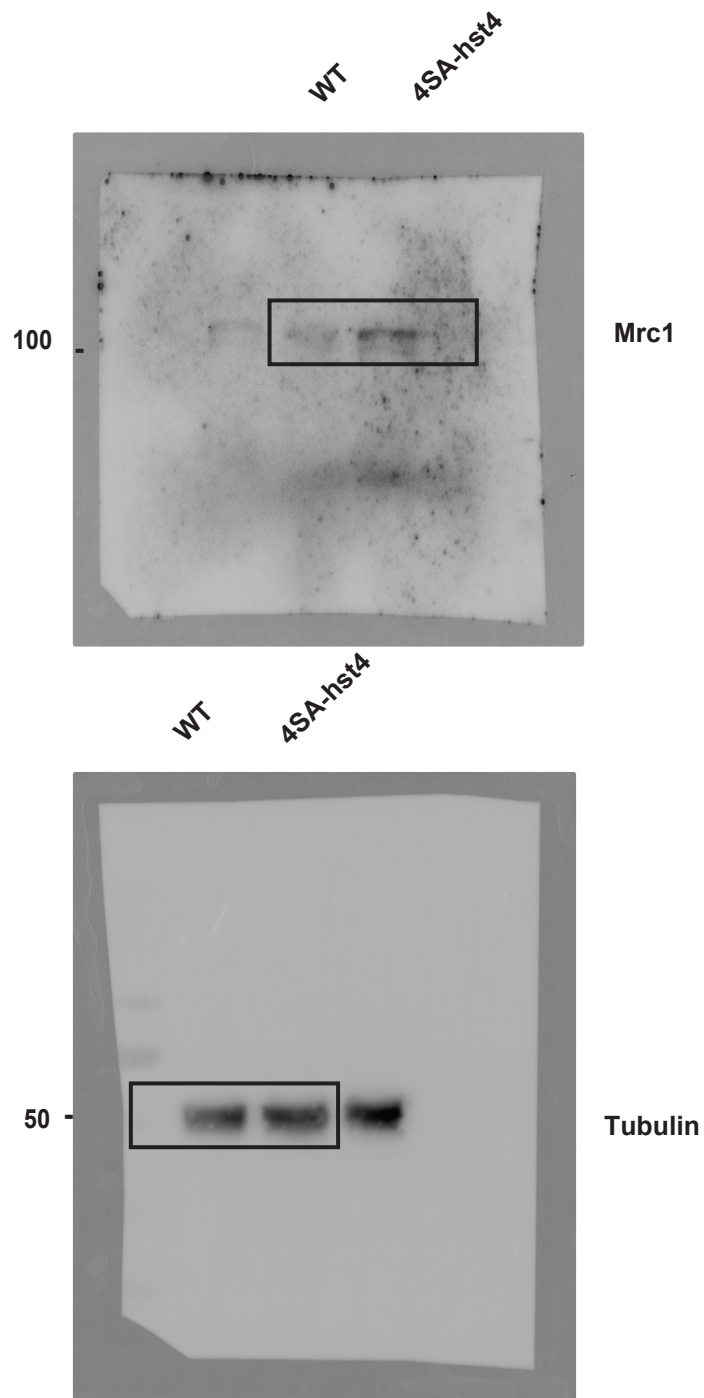

Figure 7-figure supplement 1E

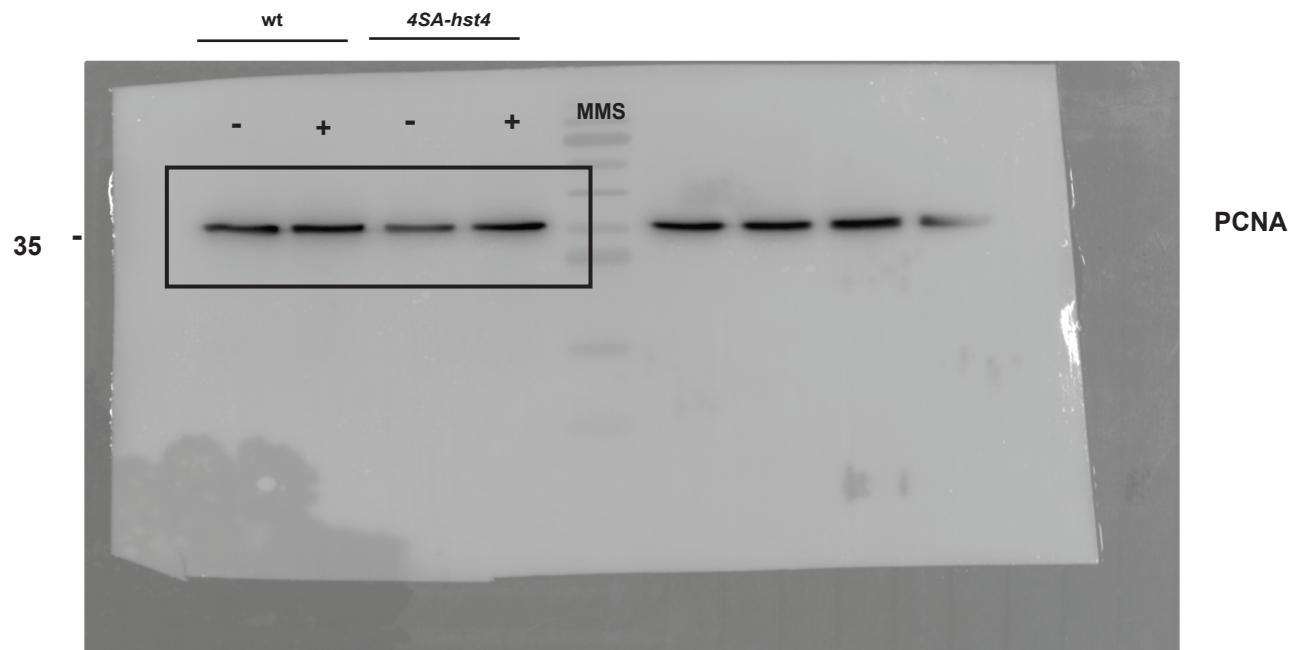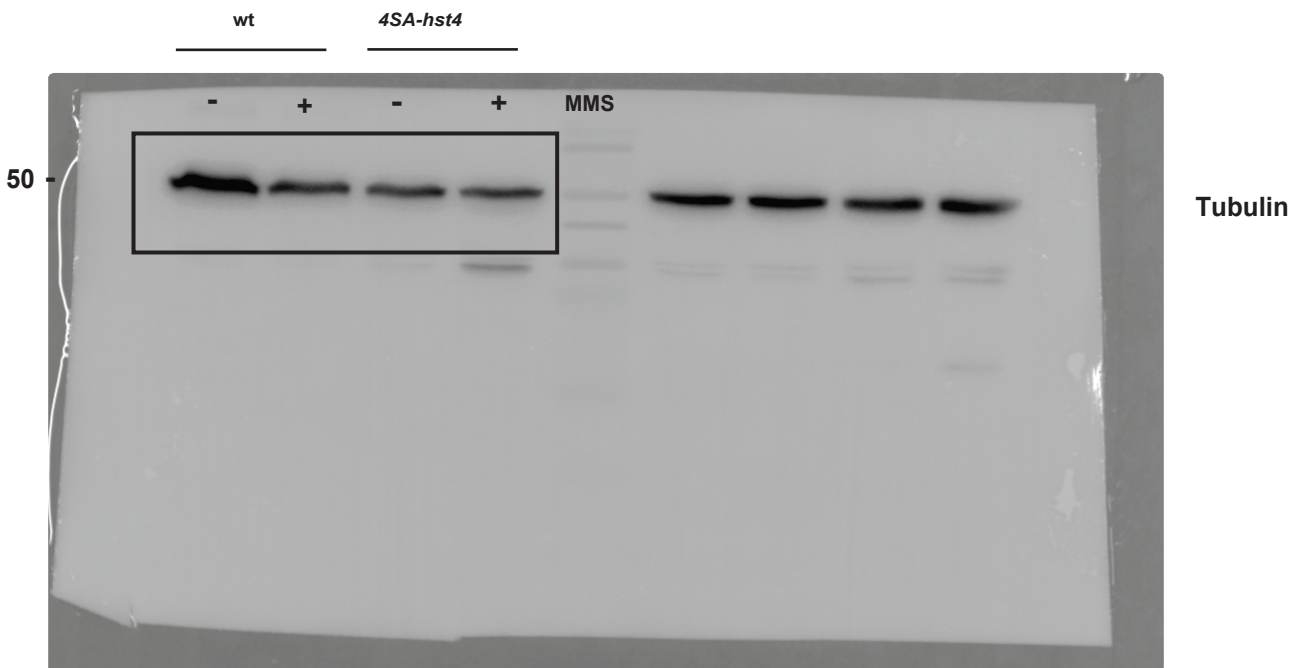

Figure 7-figure supplement 1-source data 1

Figure 7-figure supplement 1F

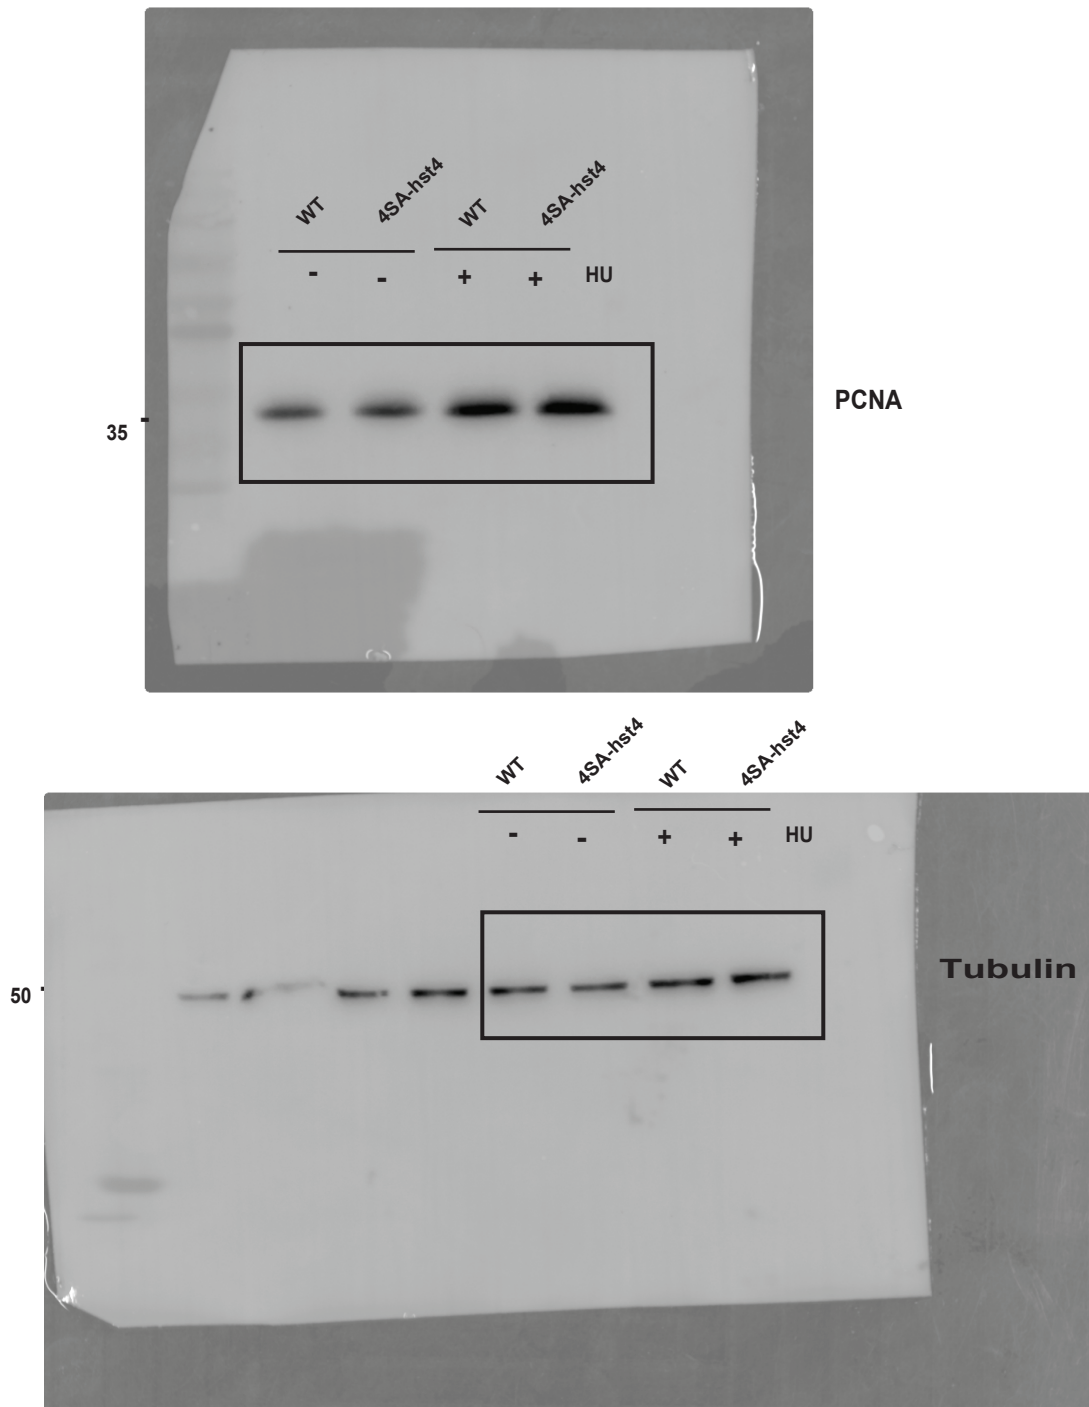

Supplement: elife-70787-fig7-figsupp1-data1.pdf [file elife-70787-fig7-figsupp1-data1.pdf]
