# Supplementary material for: DDK/Hsk1 phosphorylates and targets fission yeast histone deacetylase Hst4 for degradation to stabilize stalled DNA replication forks
Source: PubMed Central journal article supplement (PMC8565929; doi:10.7554/elife.70787), 2021-10-05
Supplement: elife-70787-supp1.pdf [file elife-70787-supp1.pdf]

Figure 1A

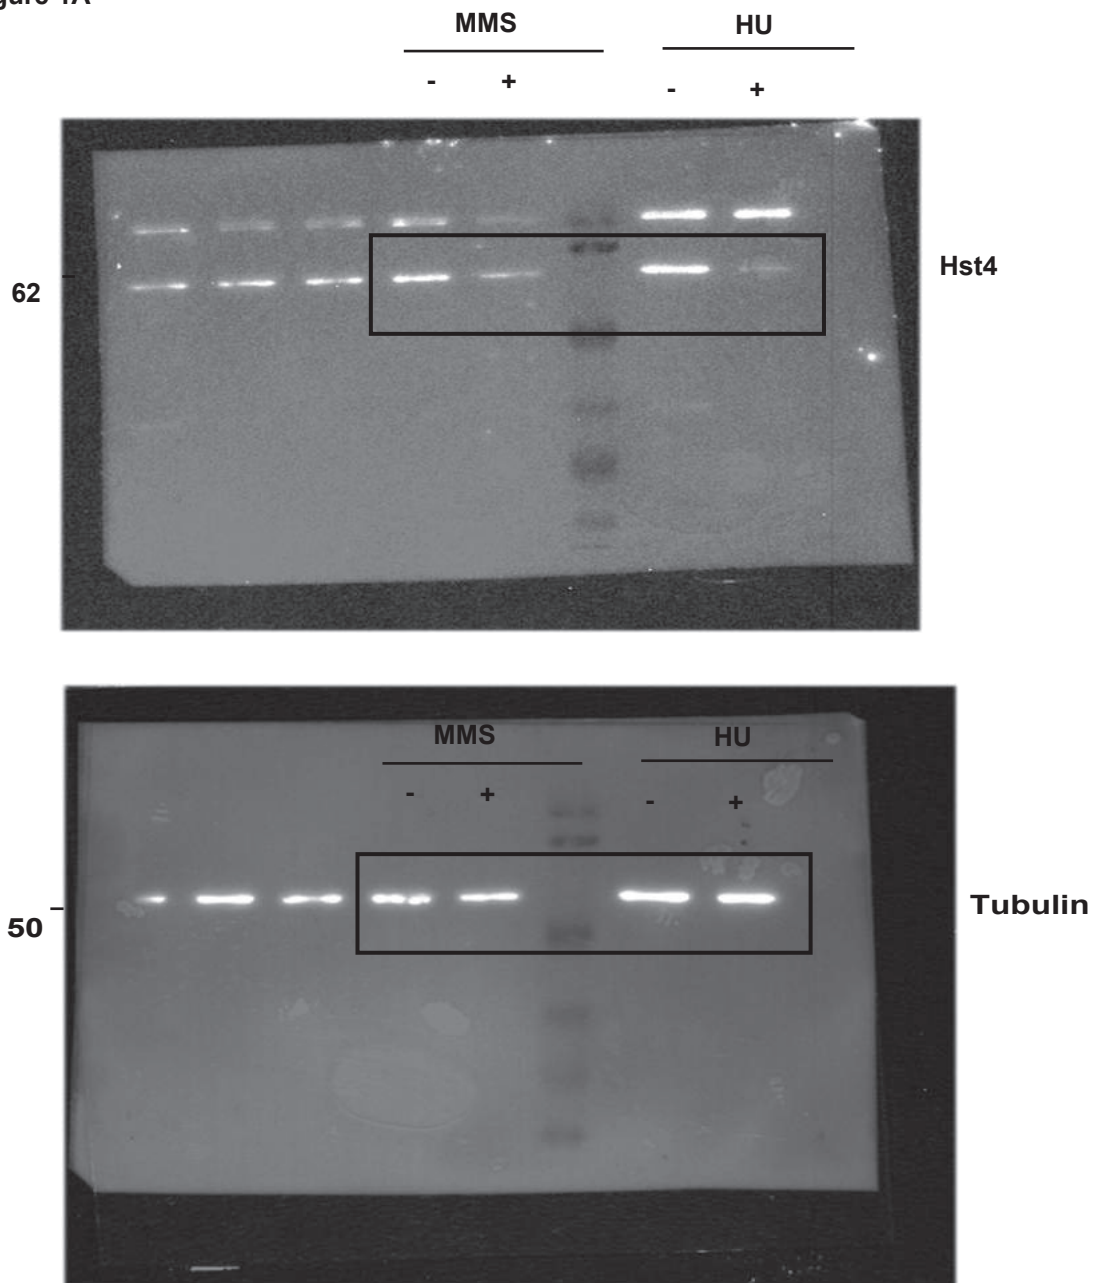

Figure 1B

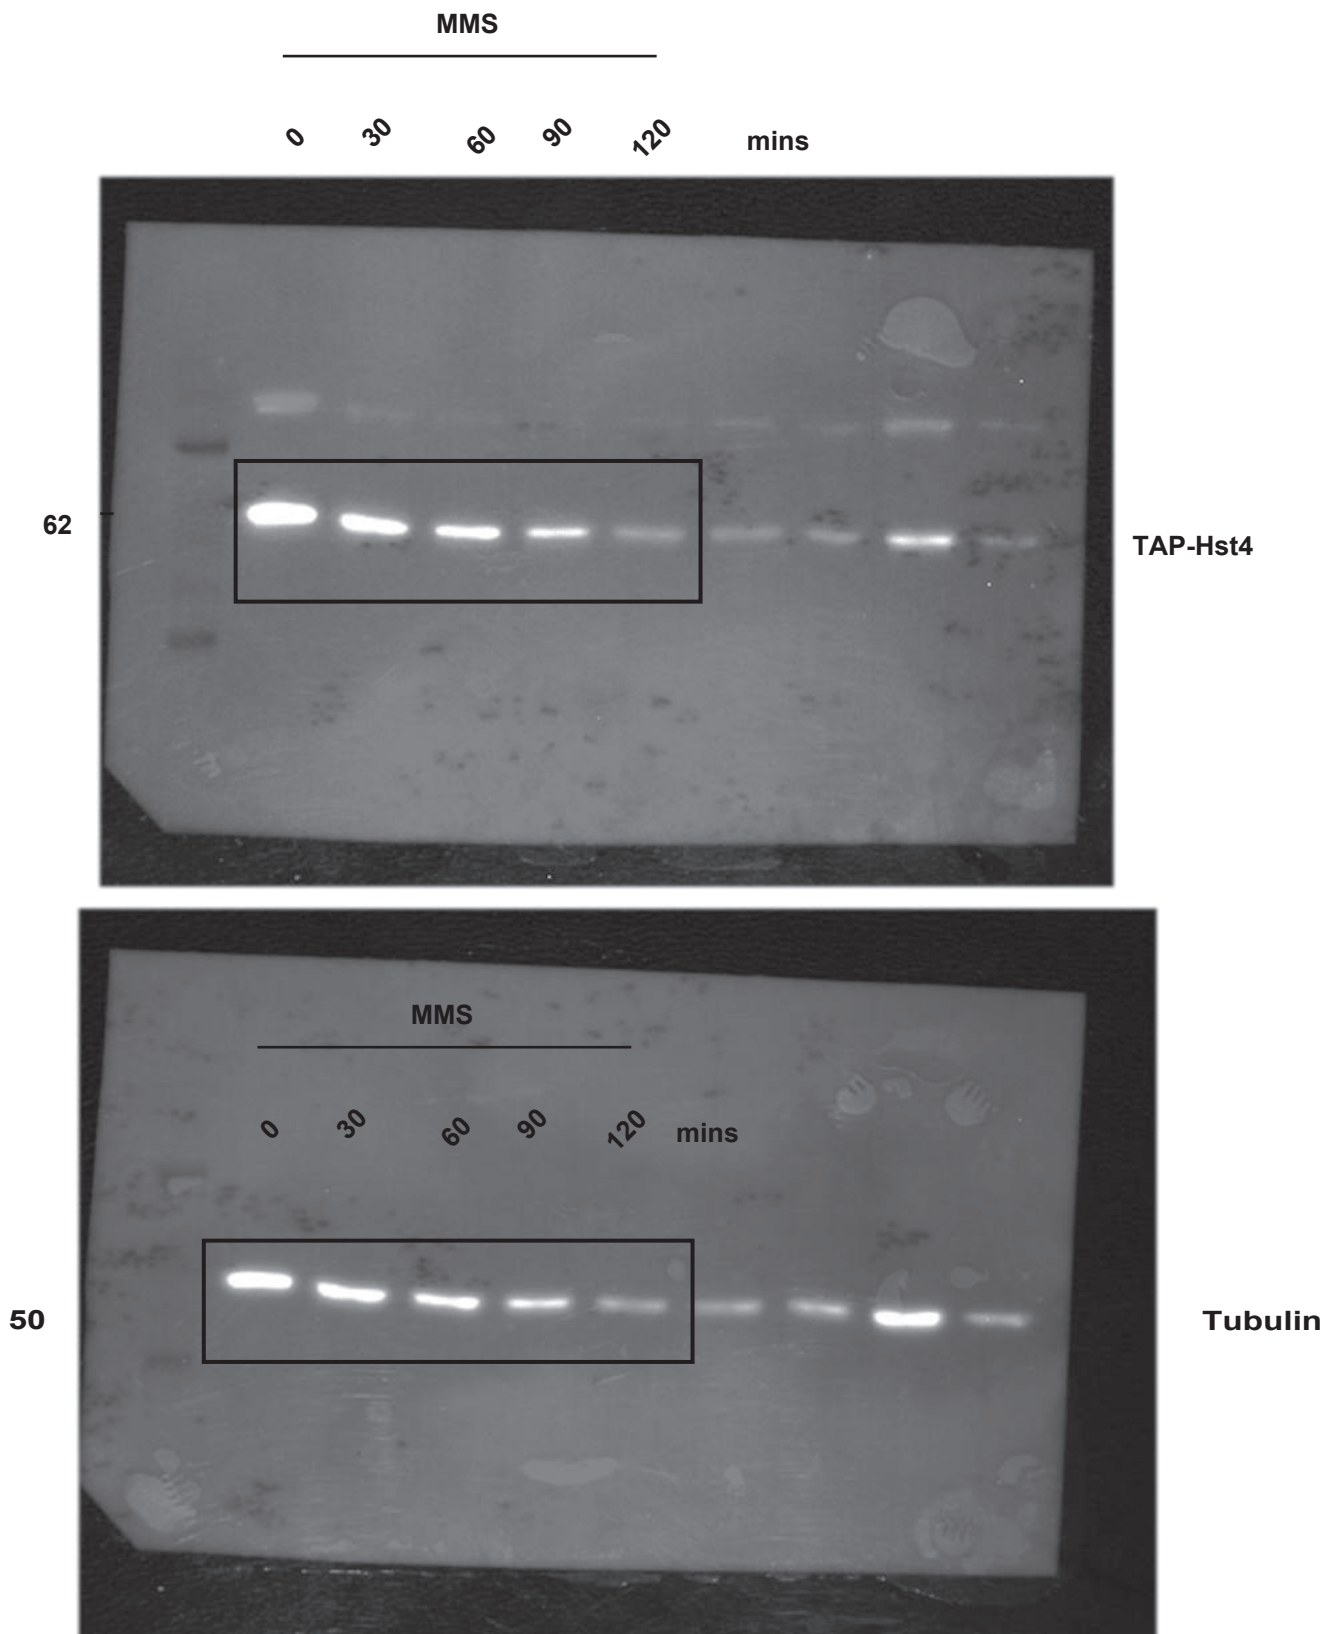

Figure 1C

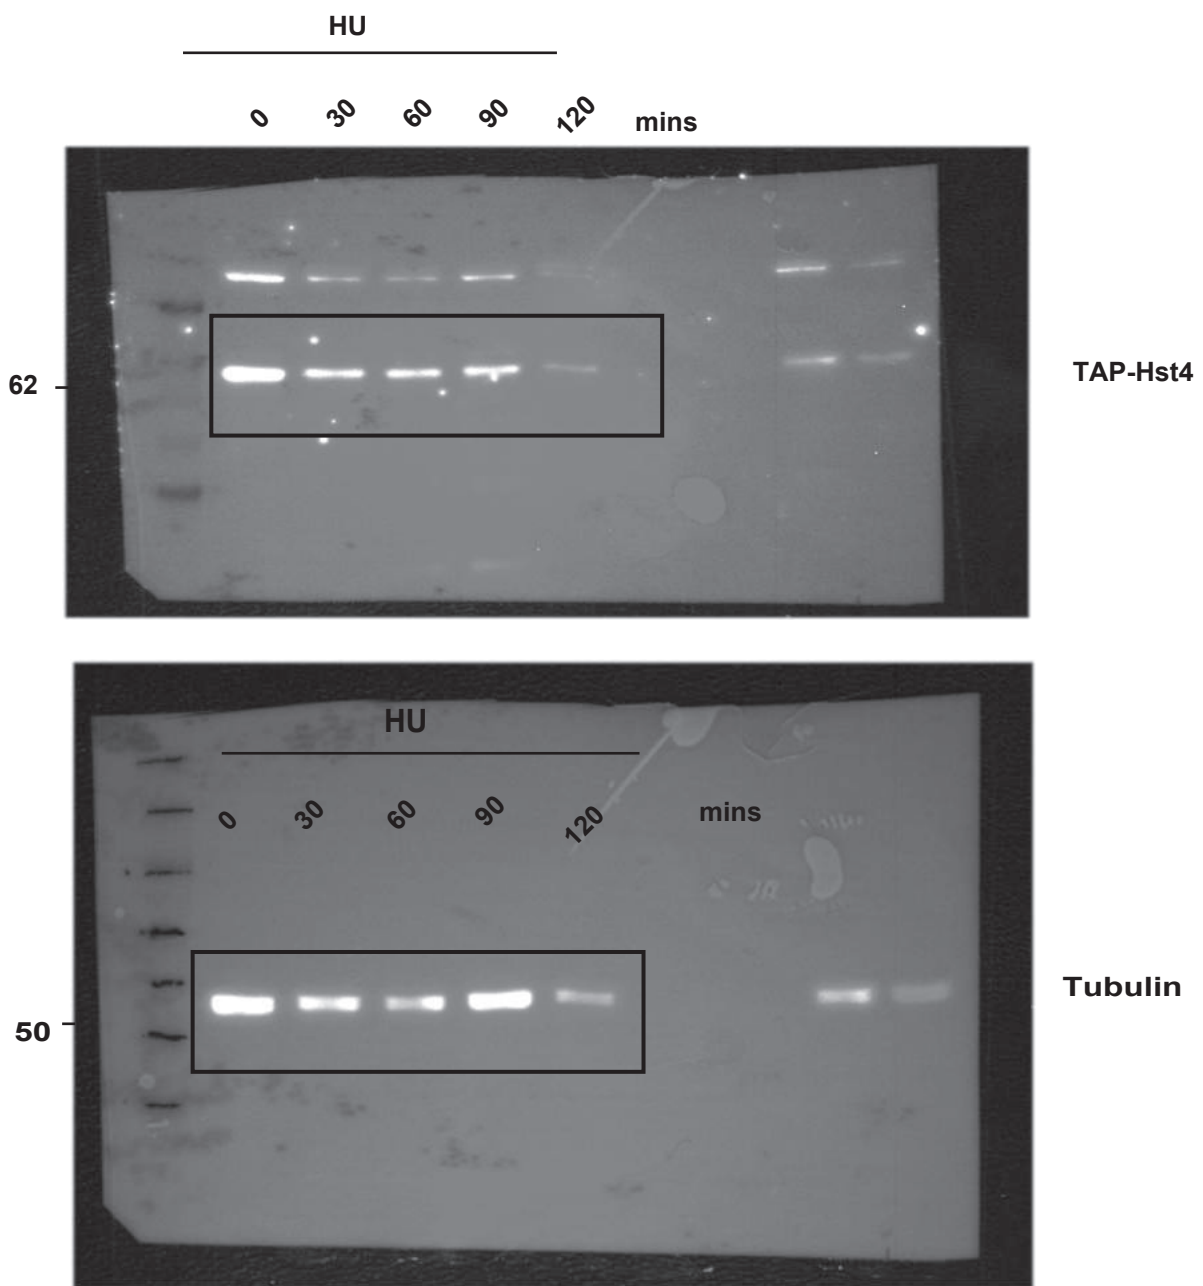





Figure 1G

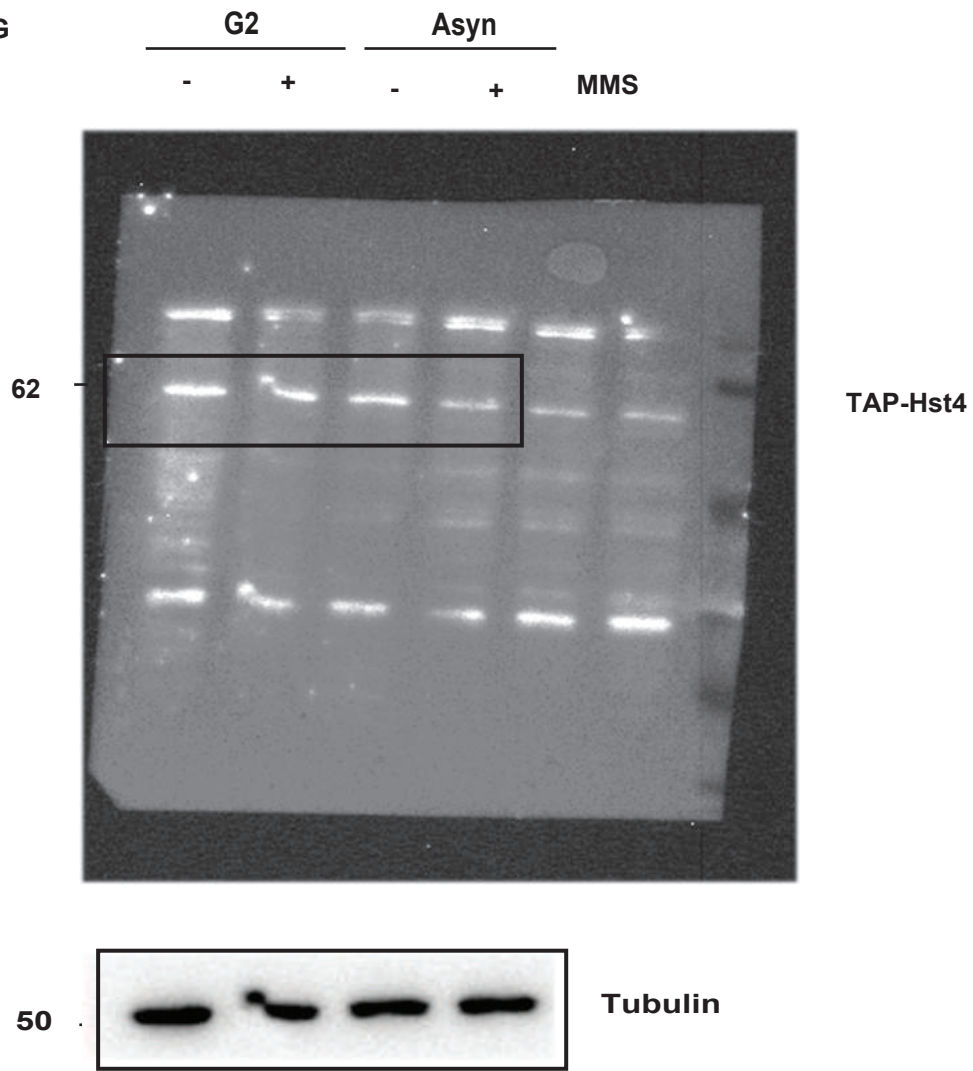

Figure 2A

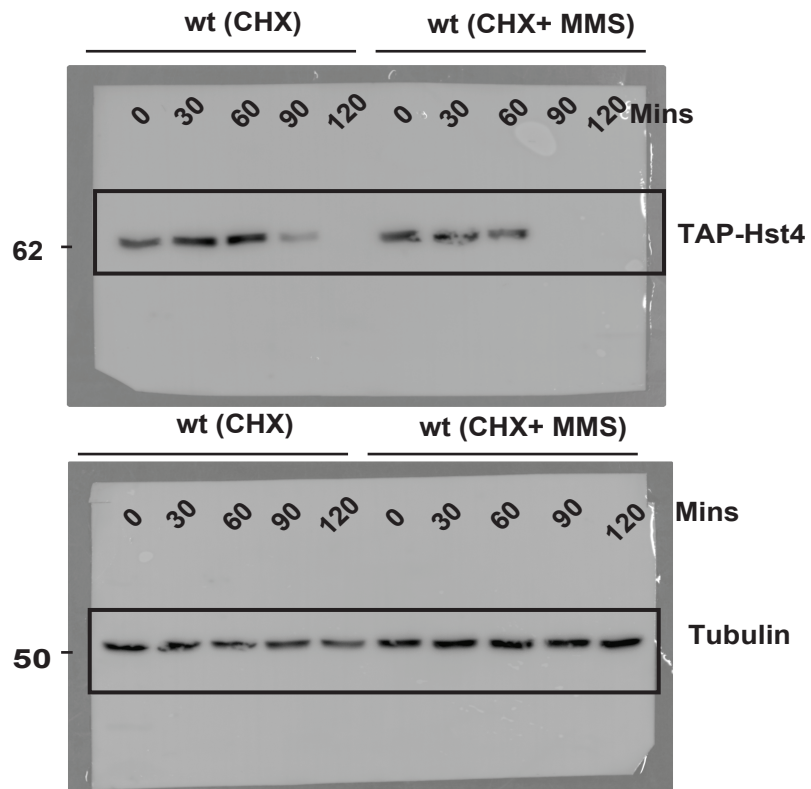

Figure 2-source data 1

Figure 2B

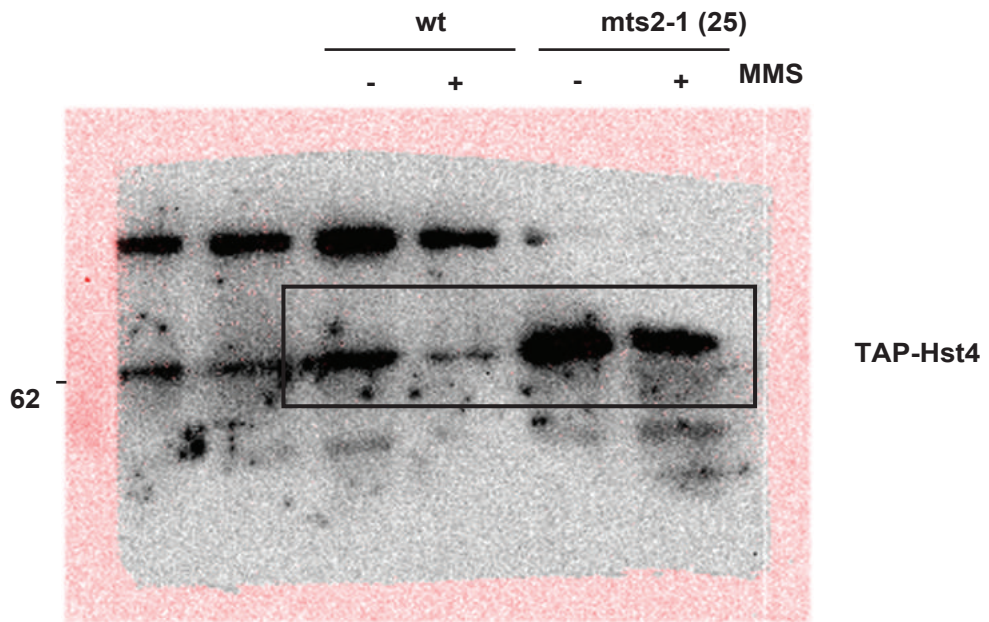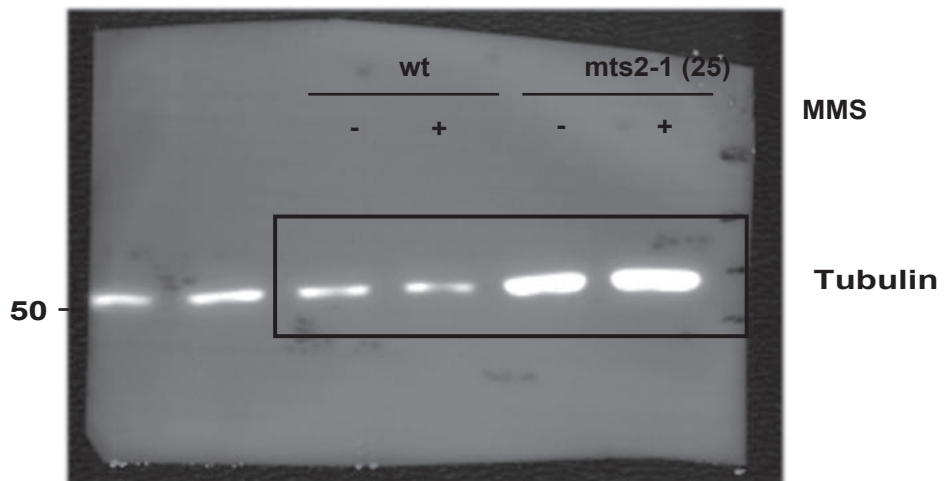



Figure 2C

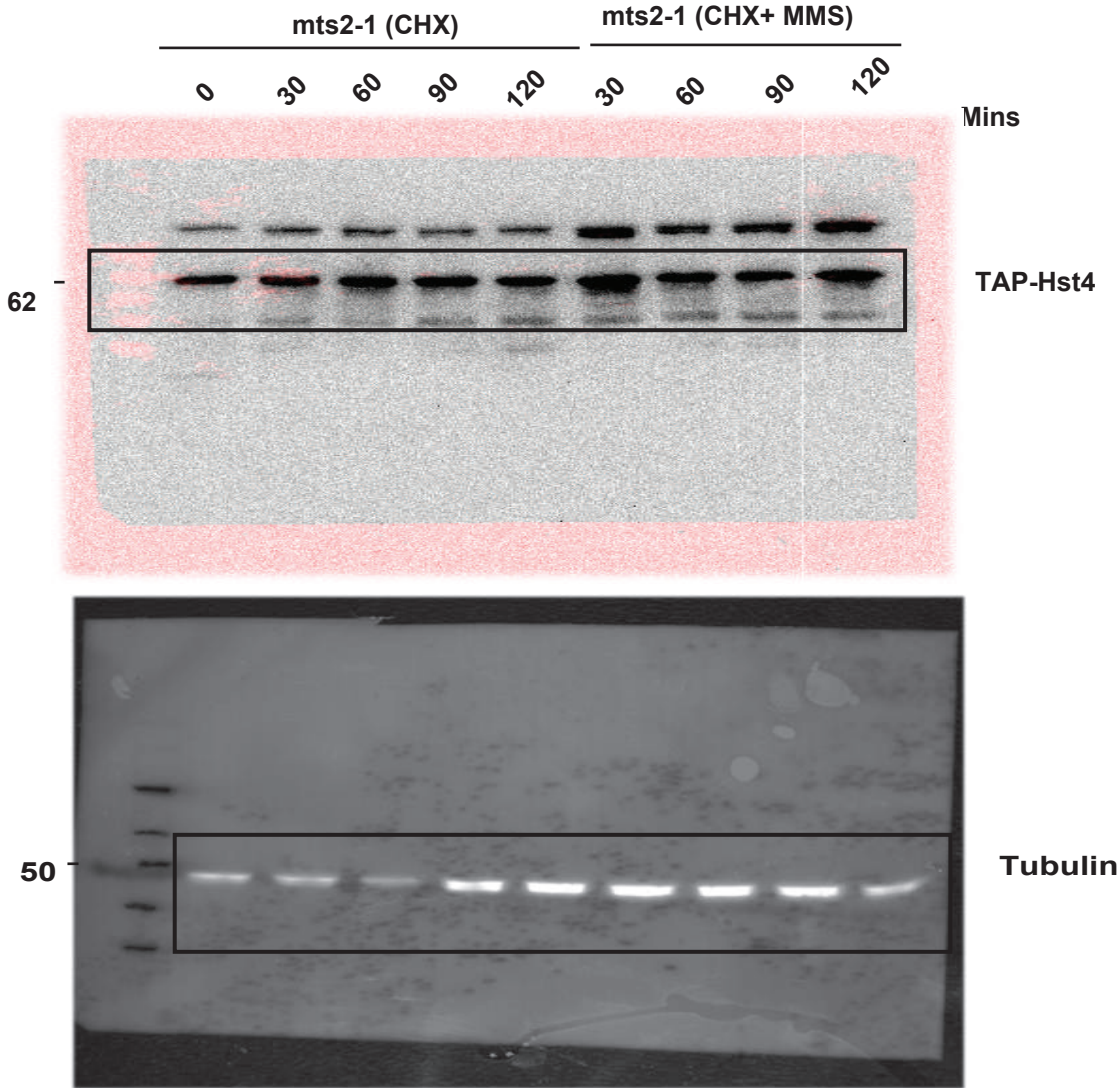

Figure 2D

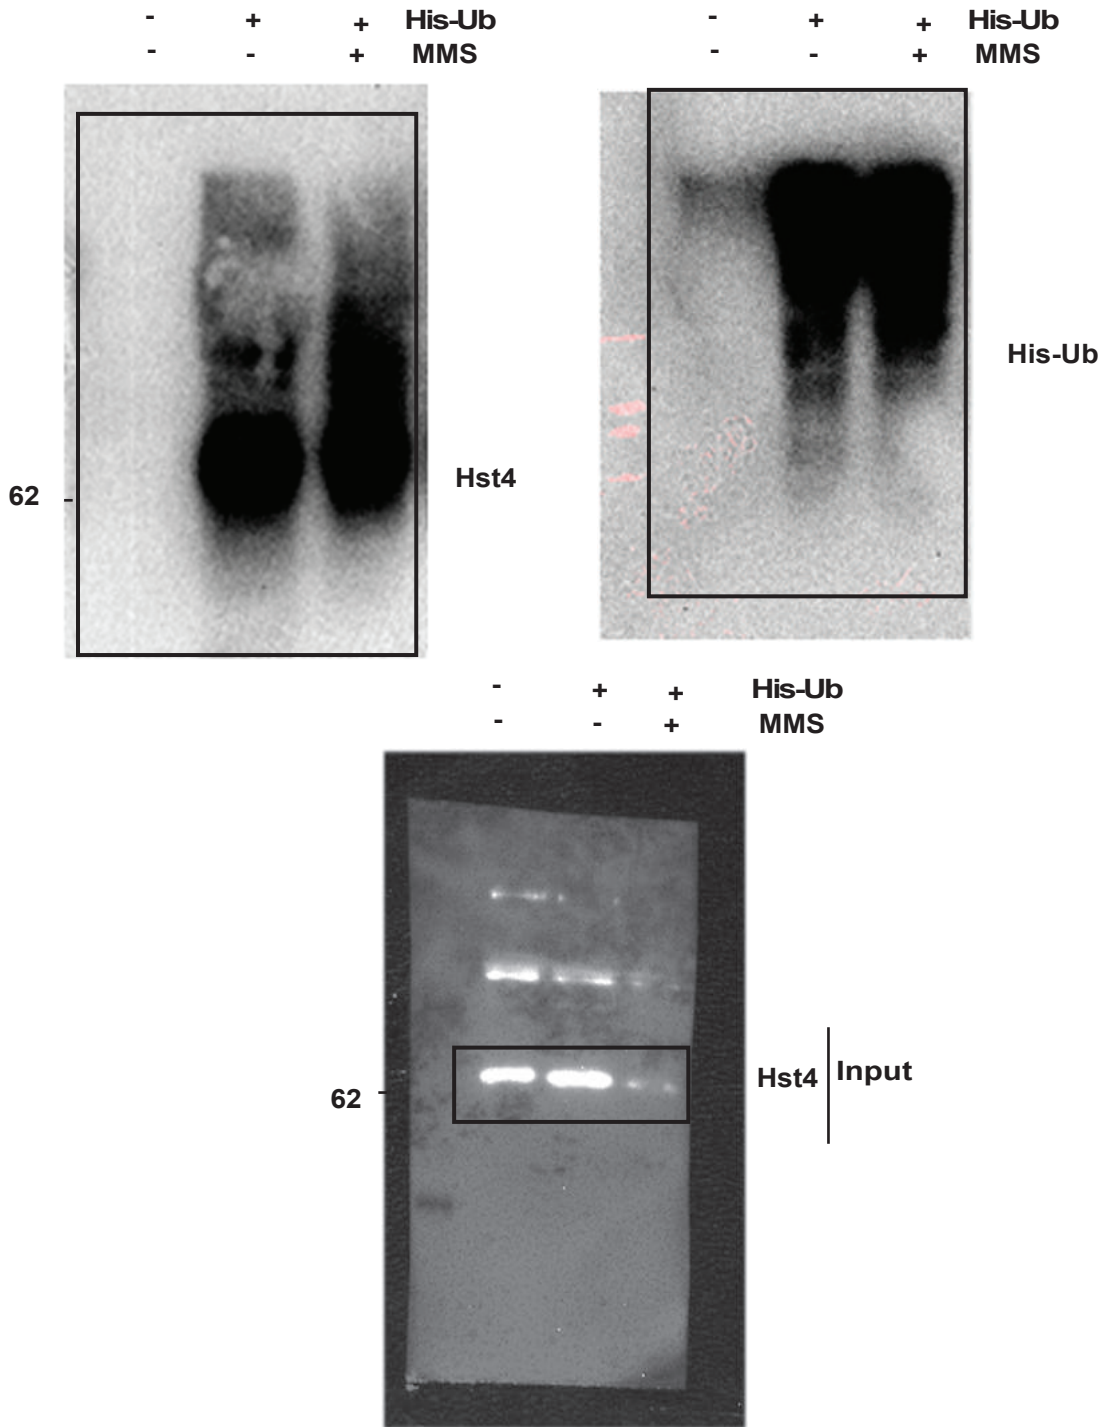

Figure 2-source data 1

Figure 2E

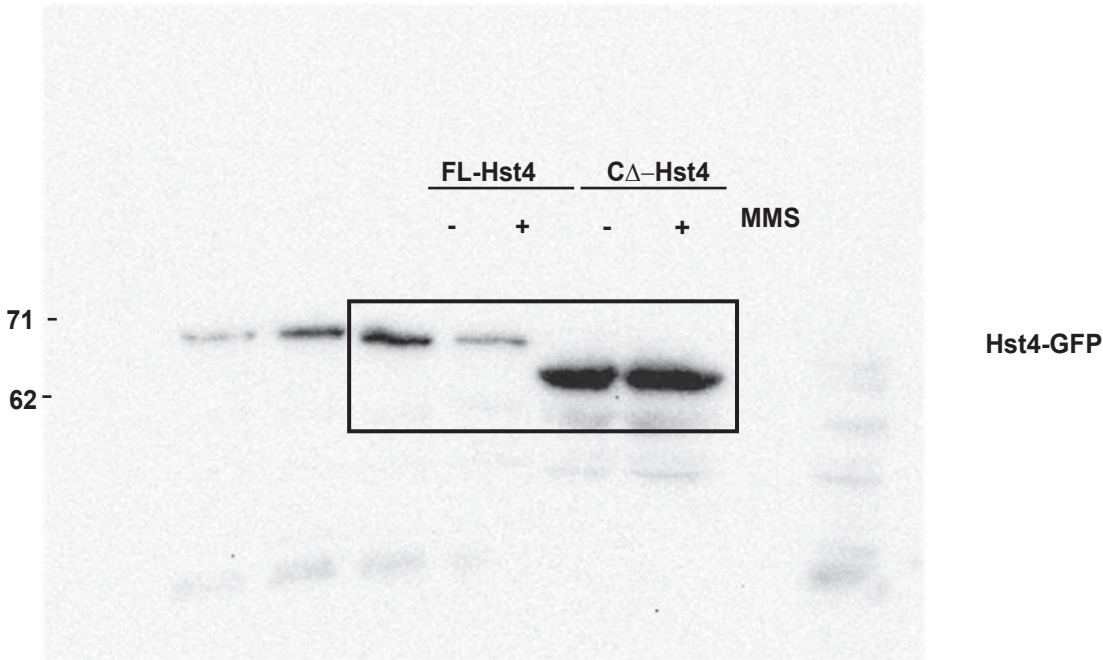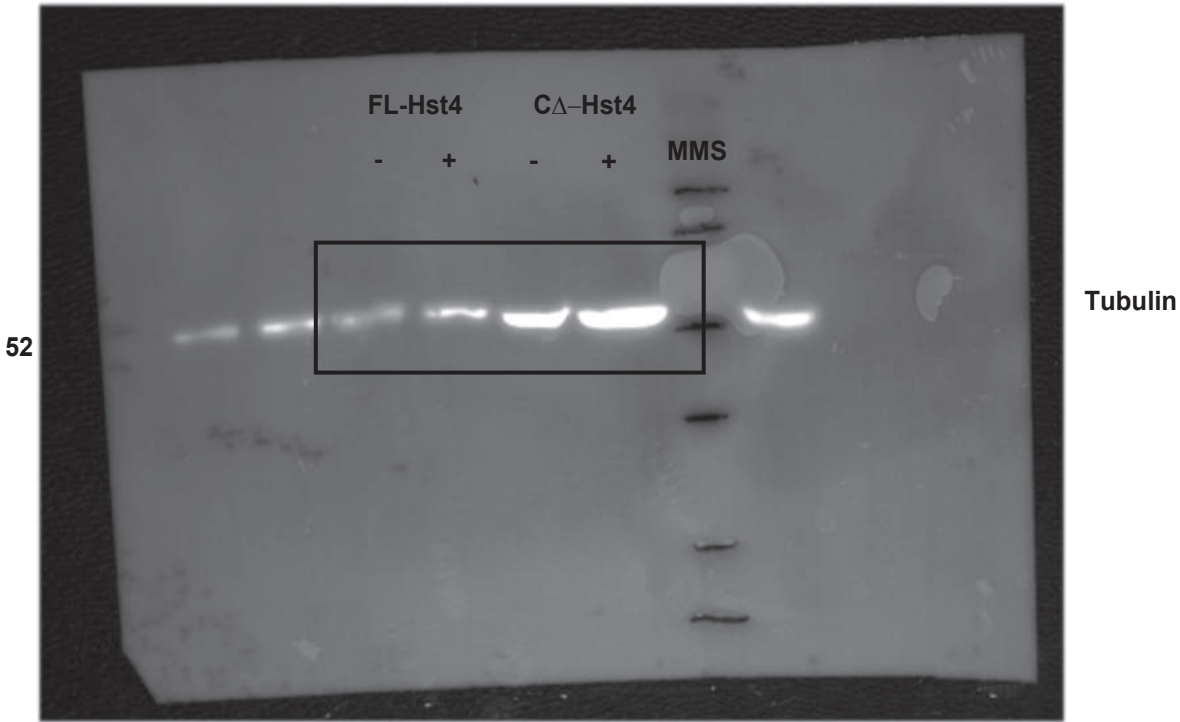

Figure 2-figure supplement 1-source data 1

Figure 2-figure supplement 1D

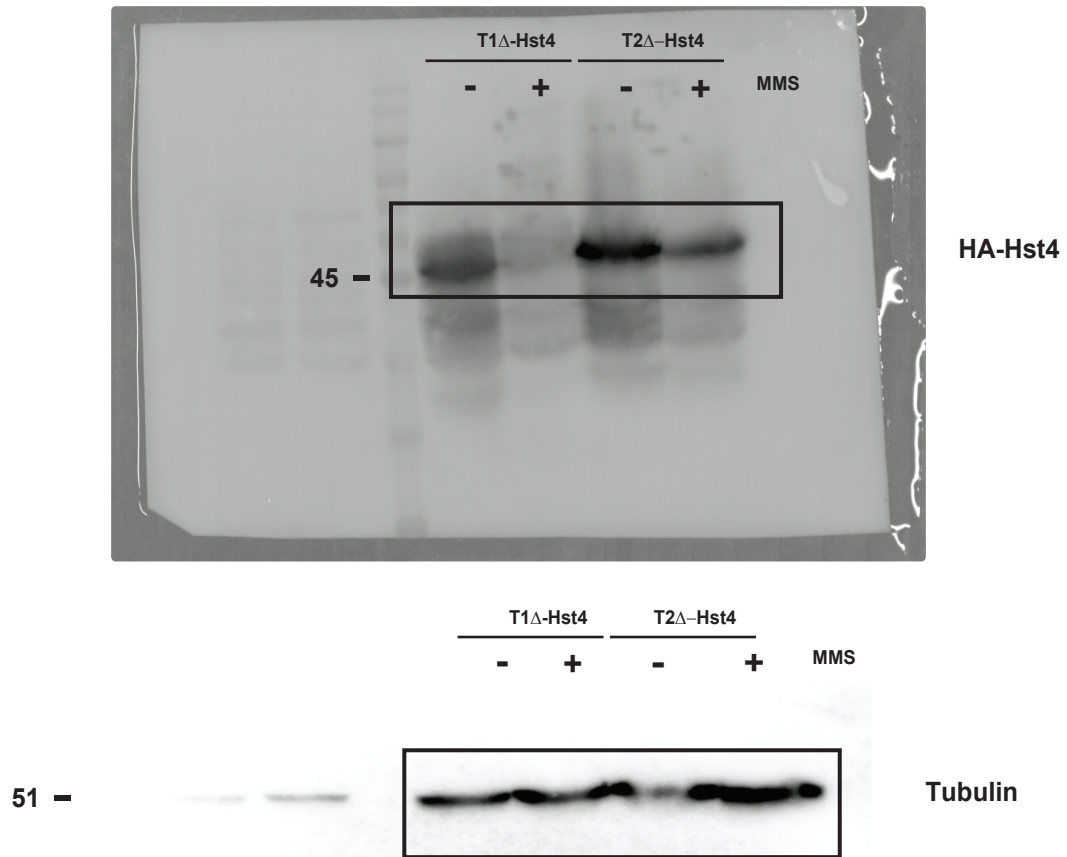

Figure 3-source data 1

Figure 3B

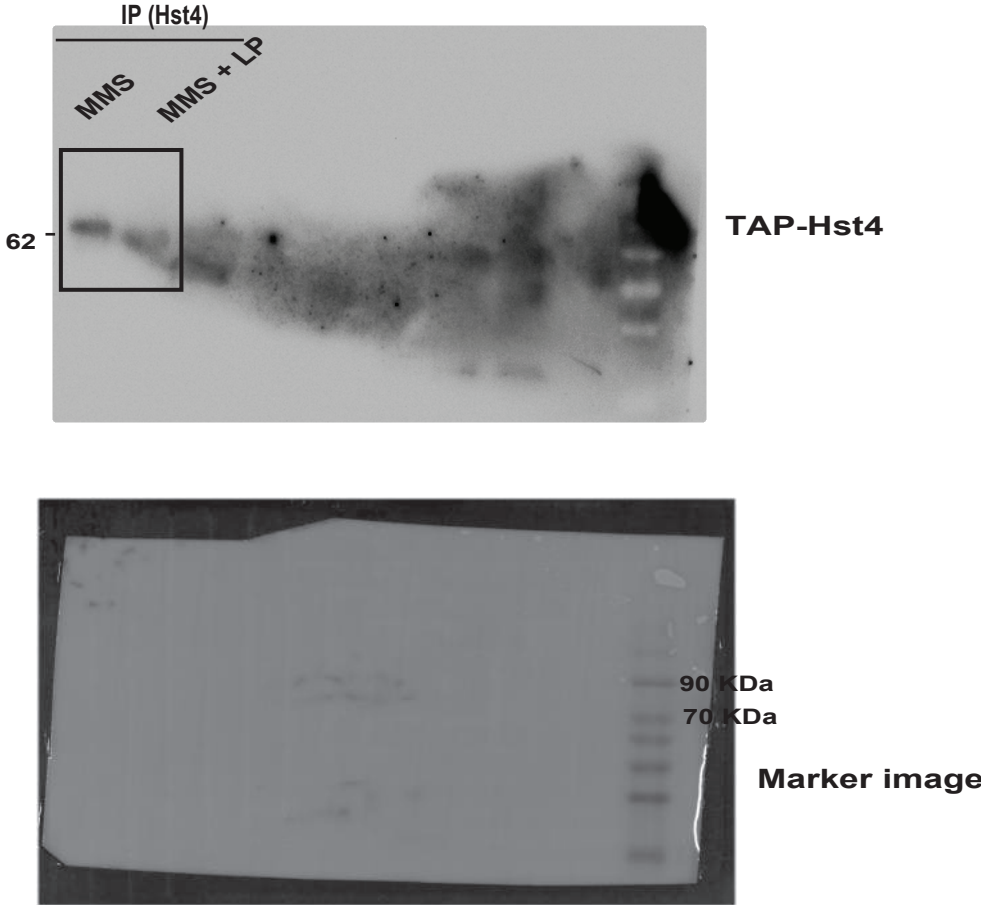

Figure 3-source data 1

Figure 3C

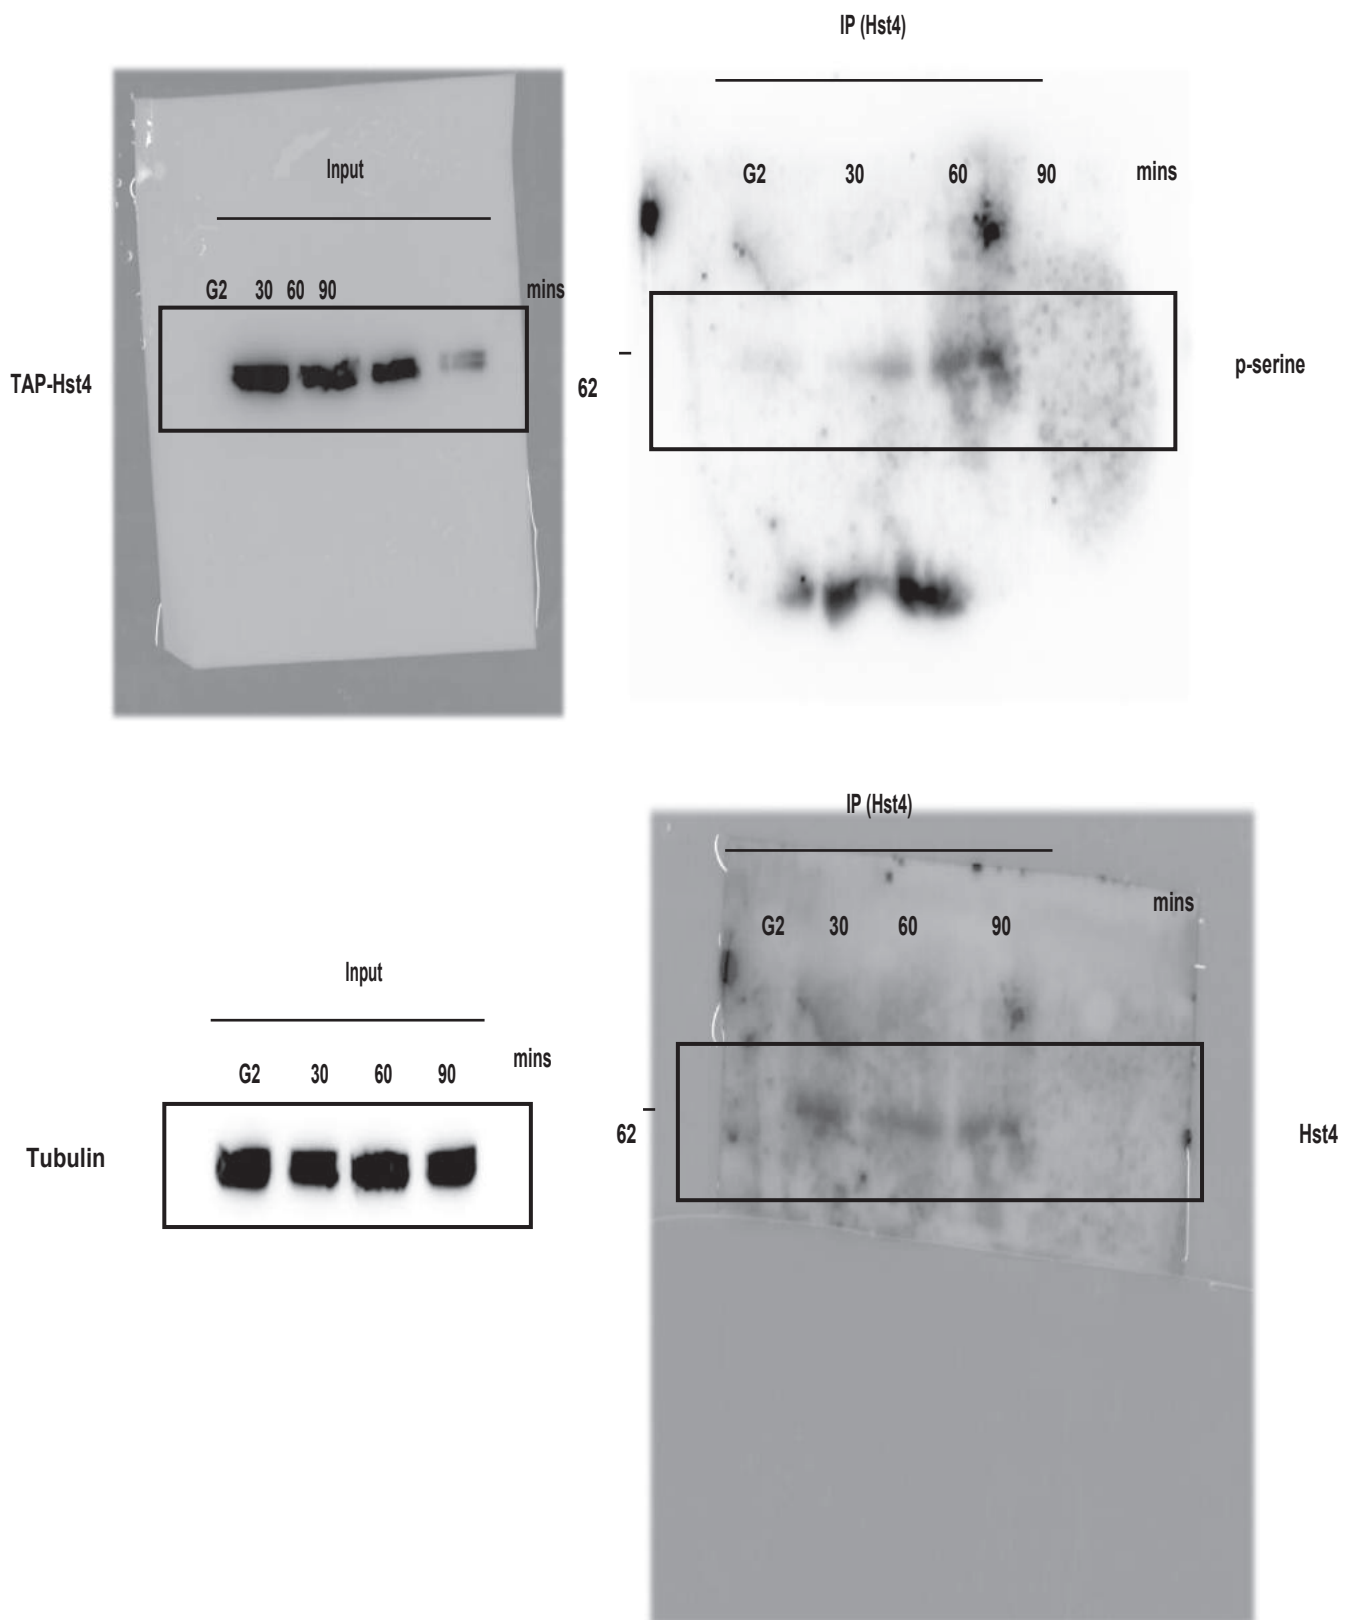

Figure 3-source data 1

Figure 3D

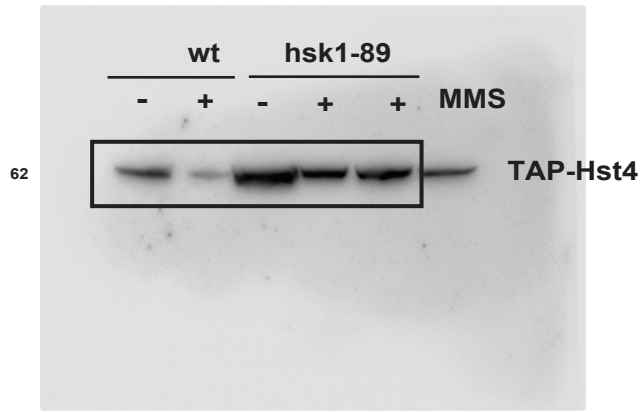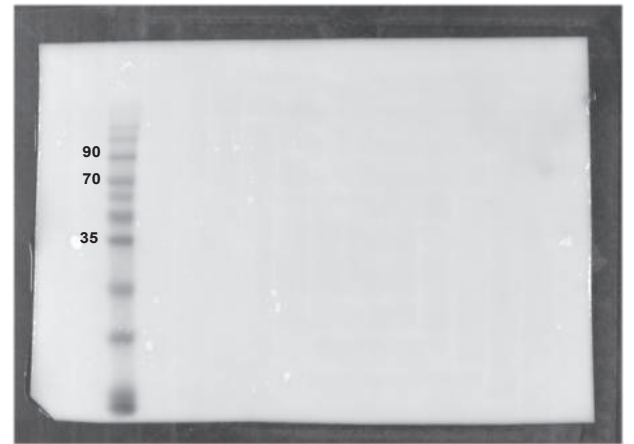

Marker image

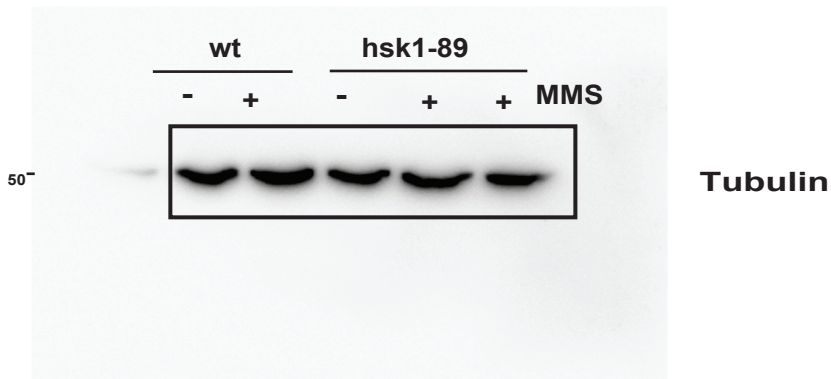

Tubulin

Figure 3E

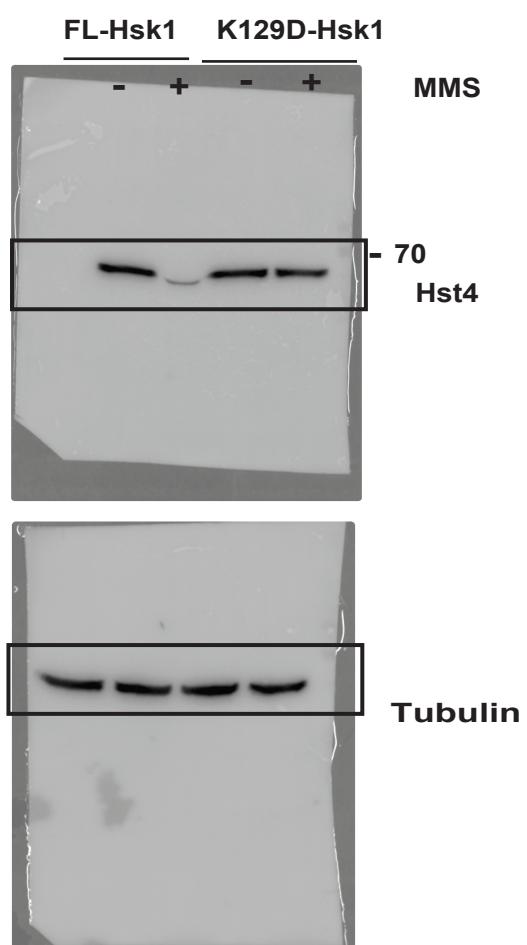



# Figure 3-source data 1

Figure 3F

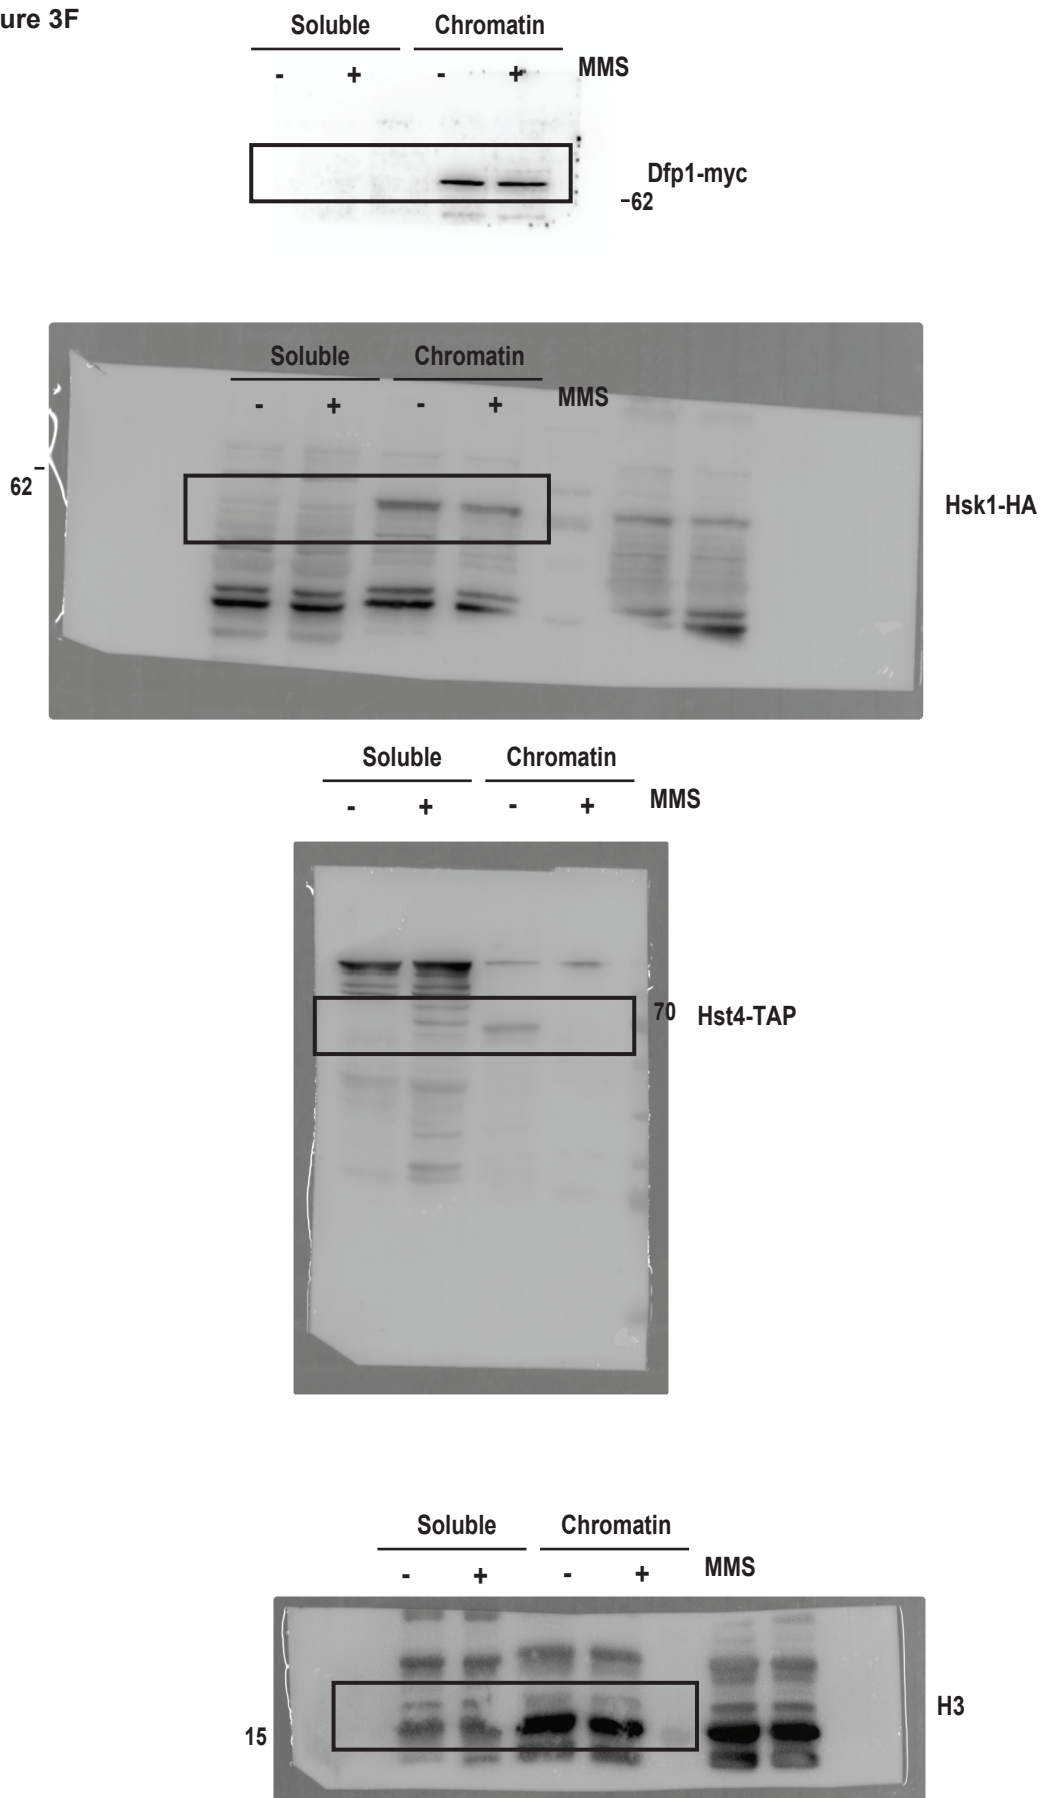

Figure 3G

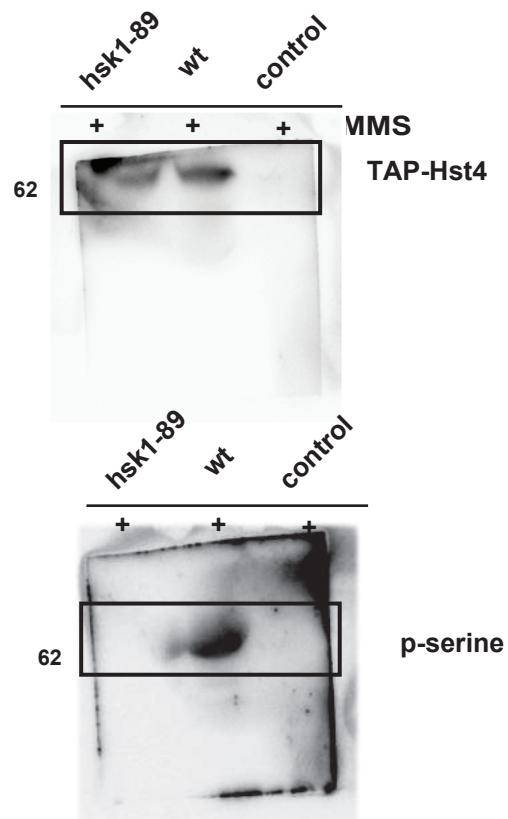

Figure 3-source data 1

Figure 3H

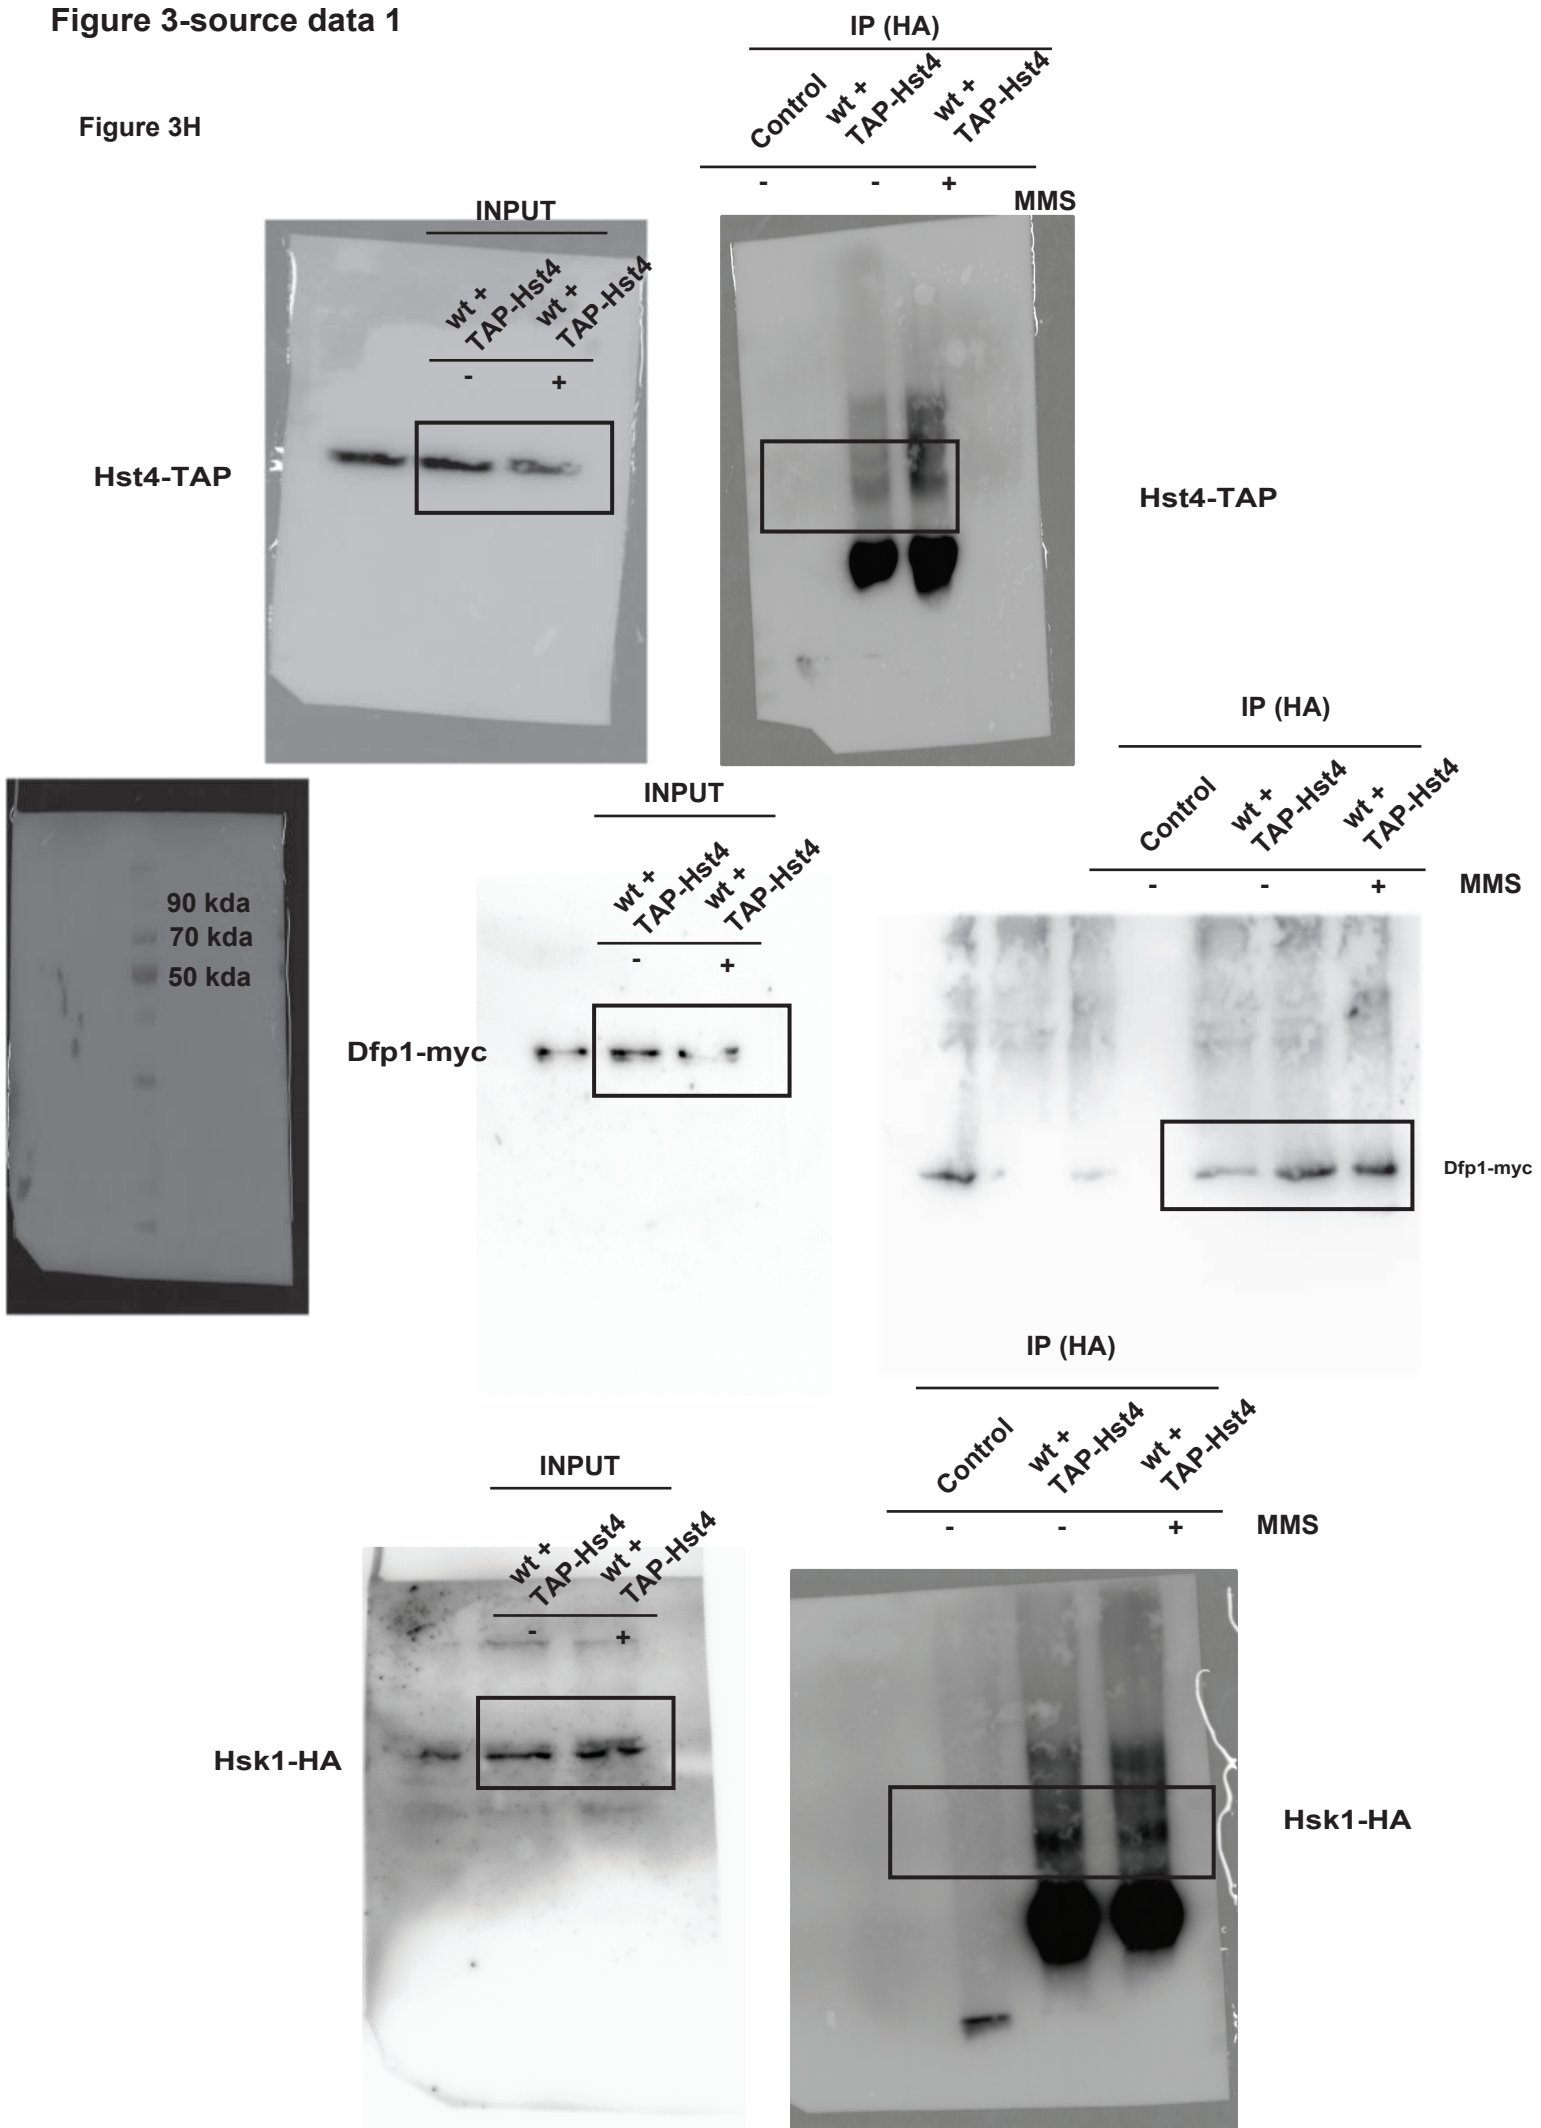

Figure 3-source data 1

Figure 3I

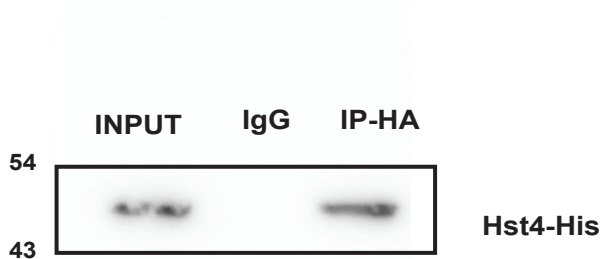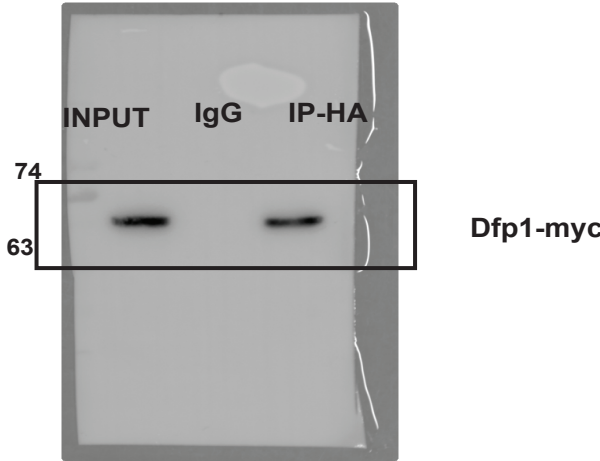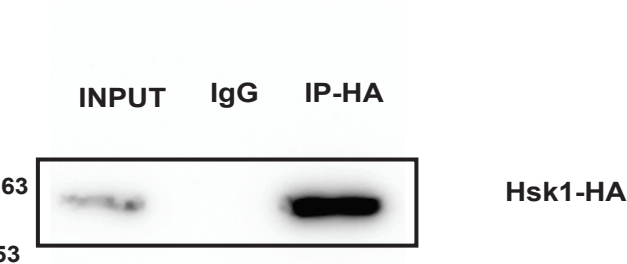

Figure 3-source data 1

Figure 3J

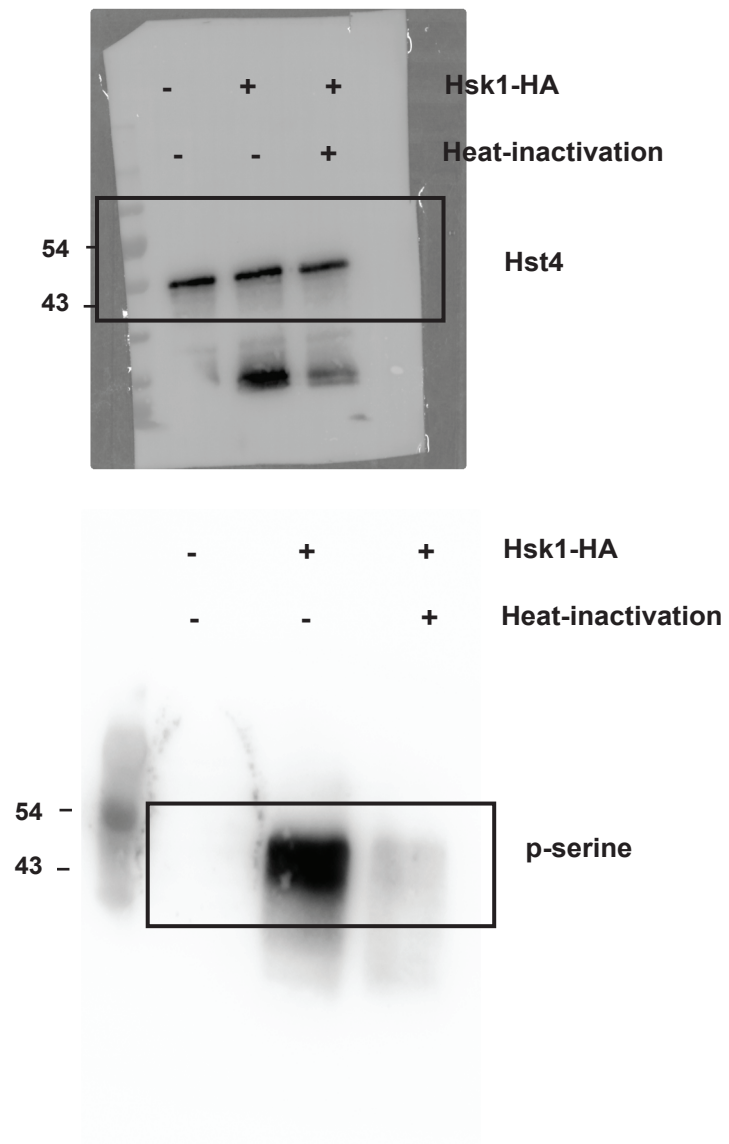

Figure 3-figure supplement 1-source data 1

Figure 3-Figure Supplement 1A

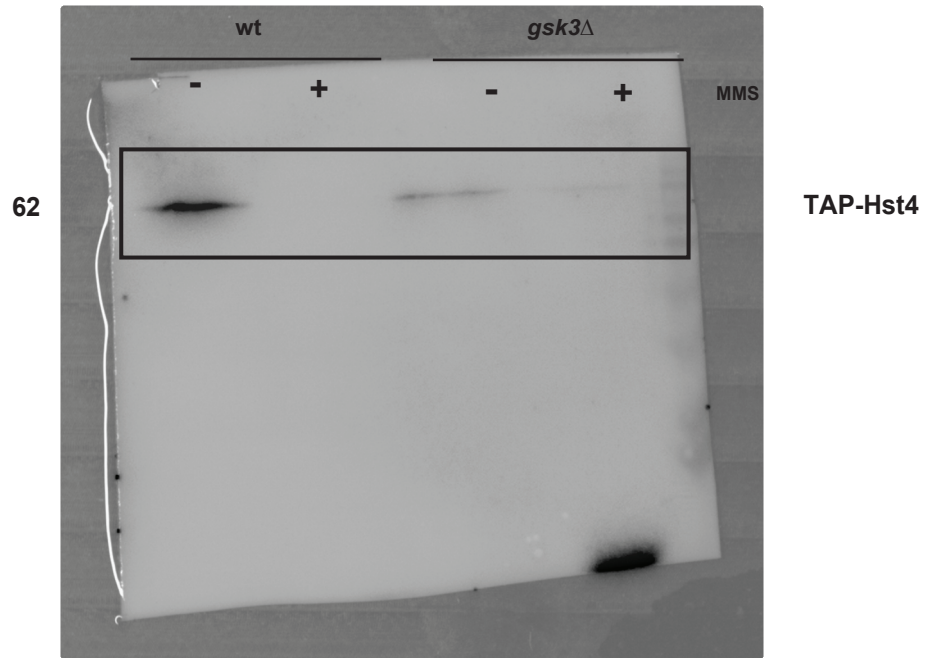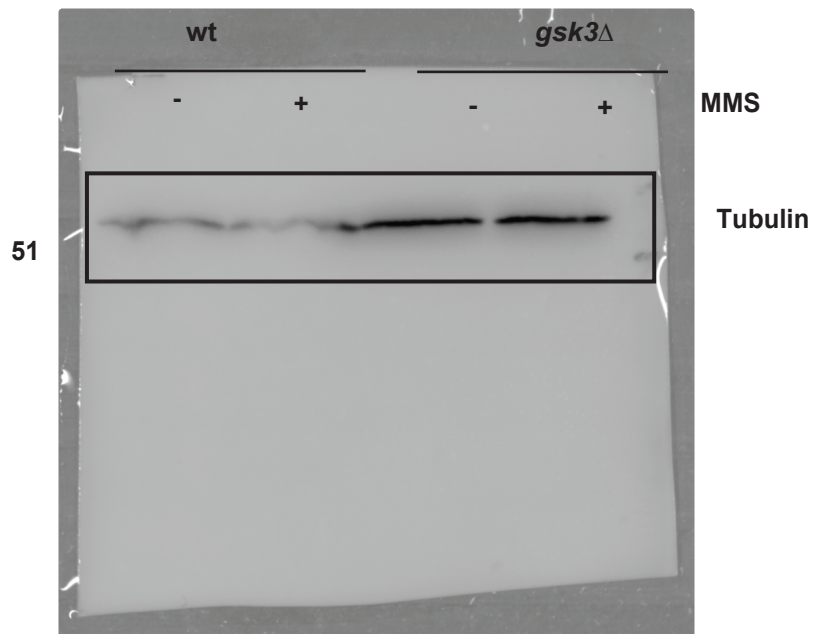

# Figure 3-figure supplement 1-source data 1

## Figure 3-Figure Supplement 1B

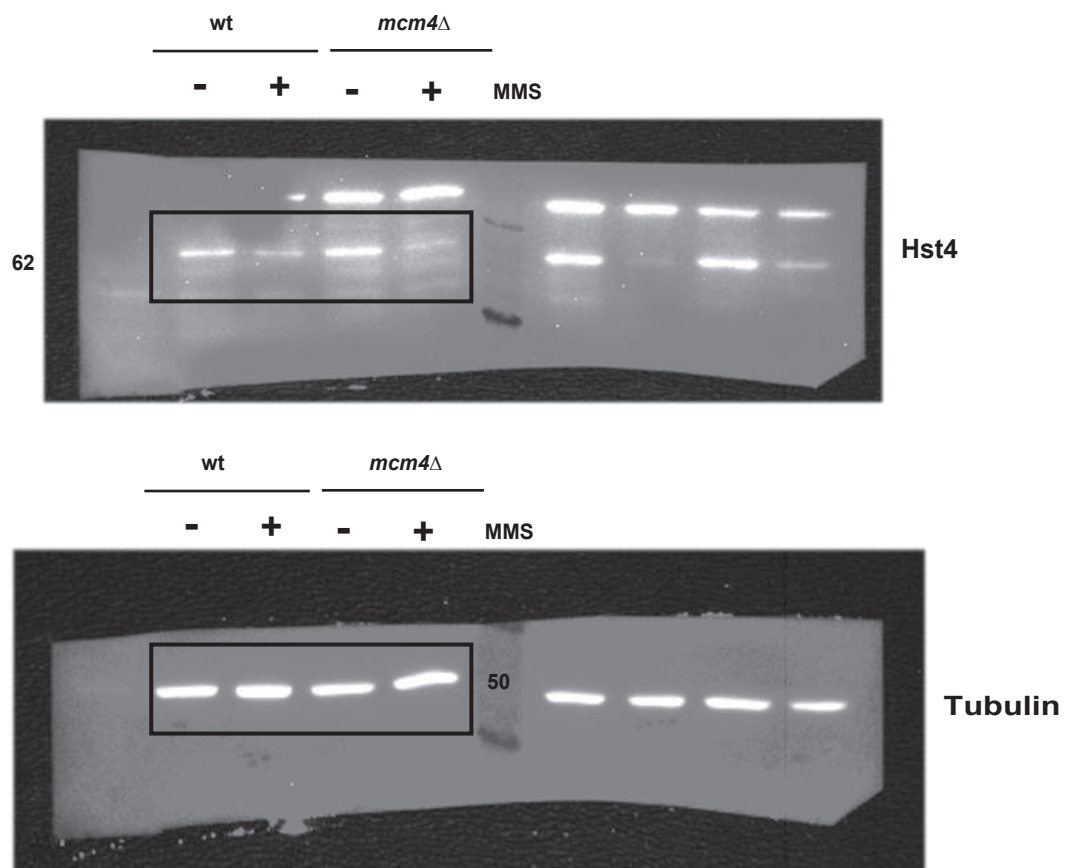

# Figure 3-figure supplement 1-source data 1

## Figure 3-Figure Supplement 1C

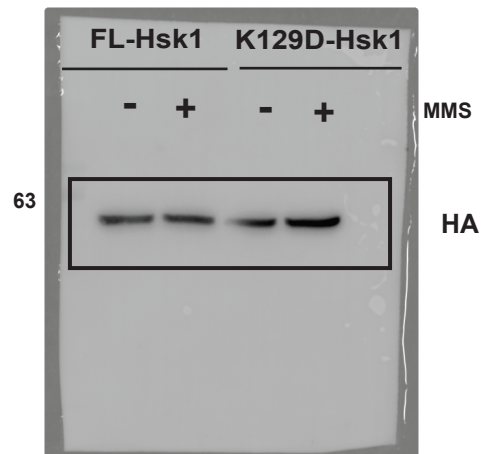





Figure 4D

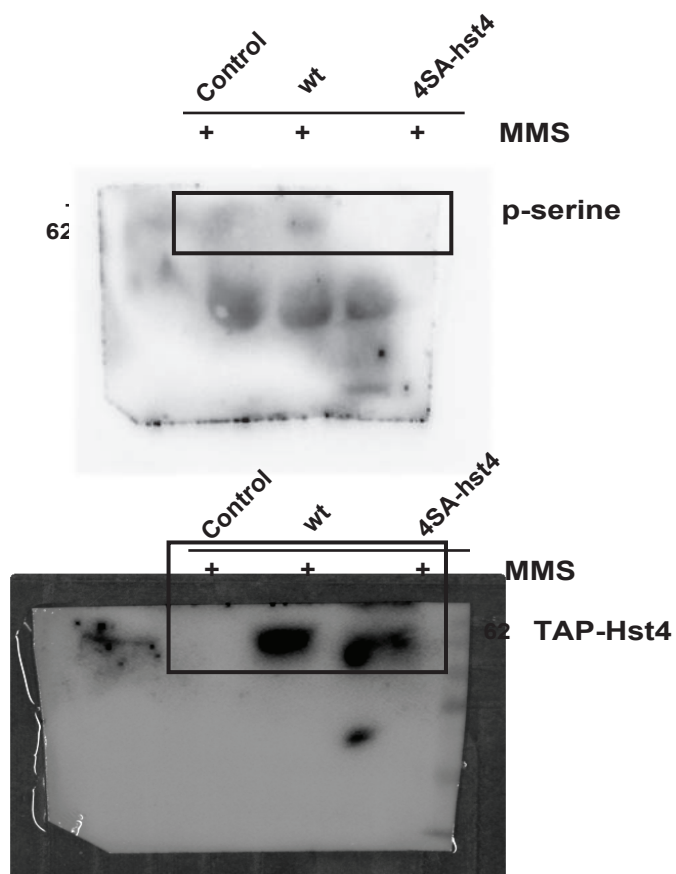

Figure 4-source data 1

Figure 4E

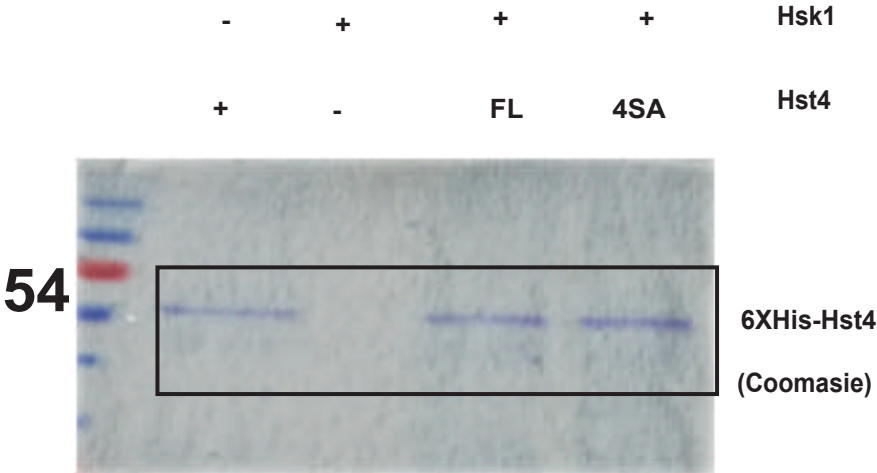



Figure 4-supplemental 1-source data 1

Figure 4-figure supplement 1B

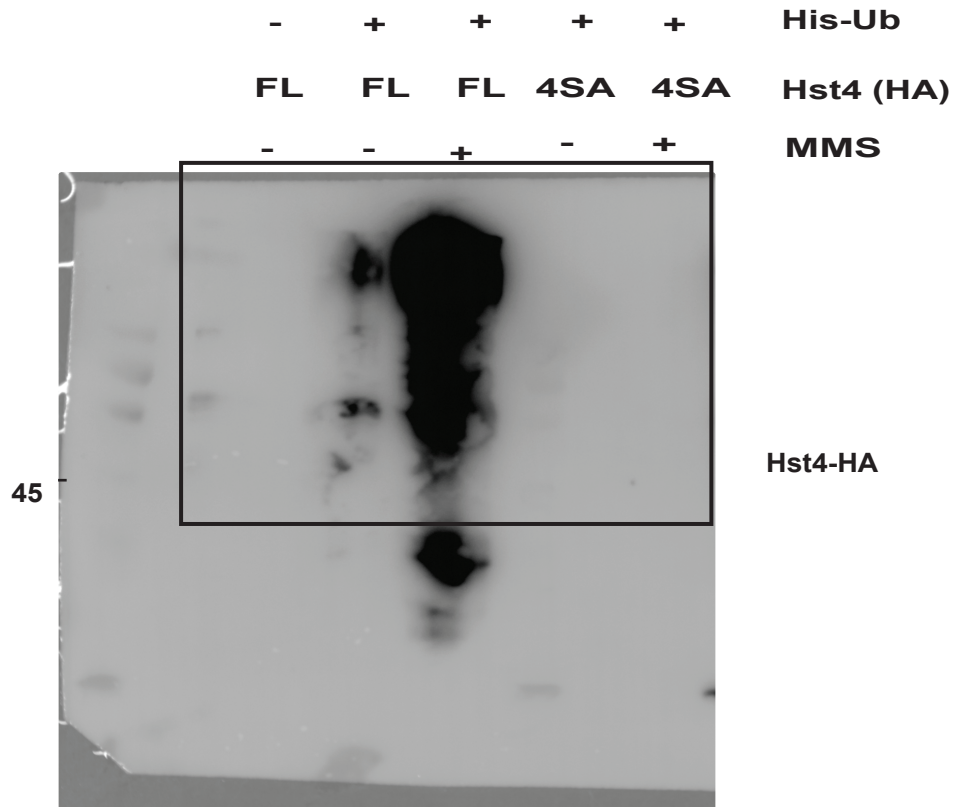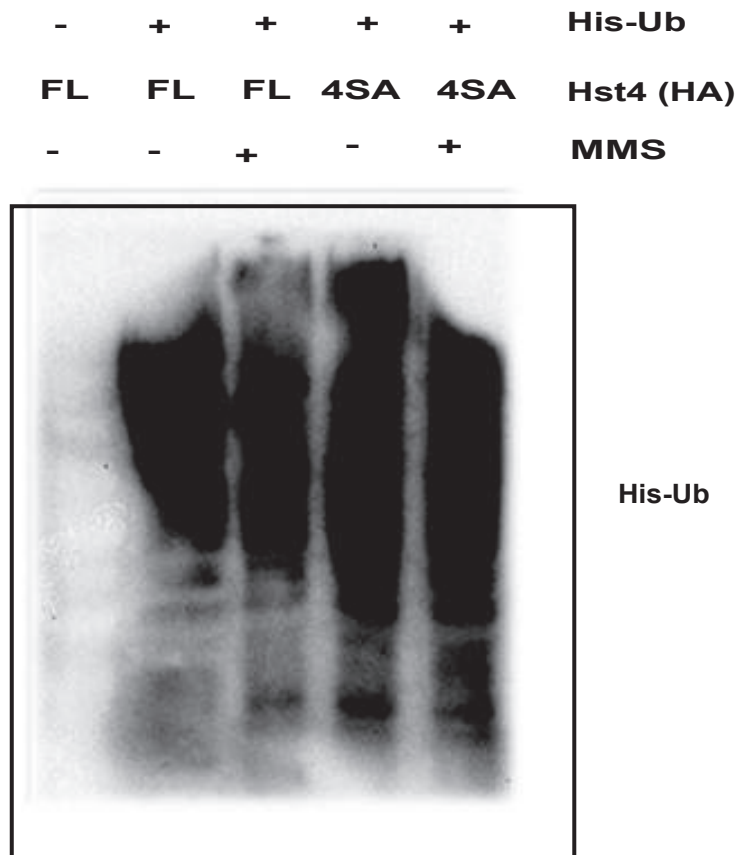

Figure 5-source data 1

Figure 5A

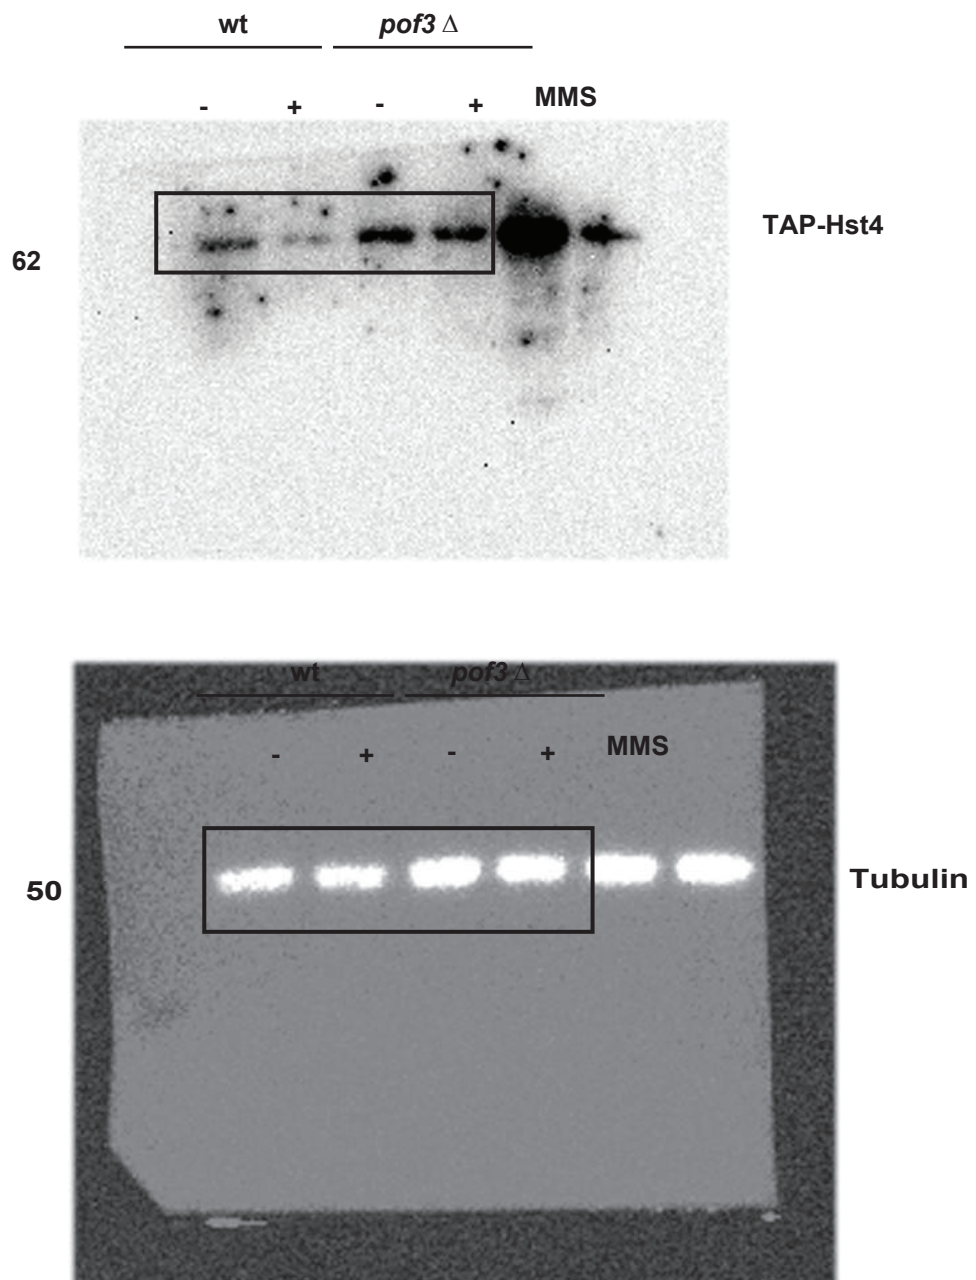

Figure 5-source data 1

Figure 5B

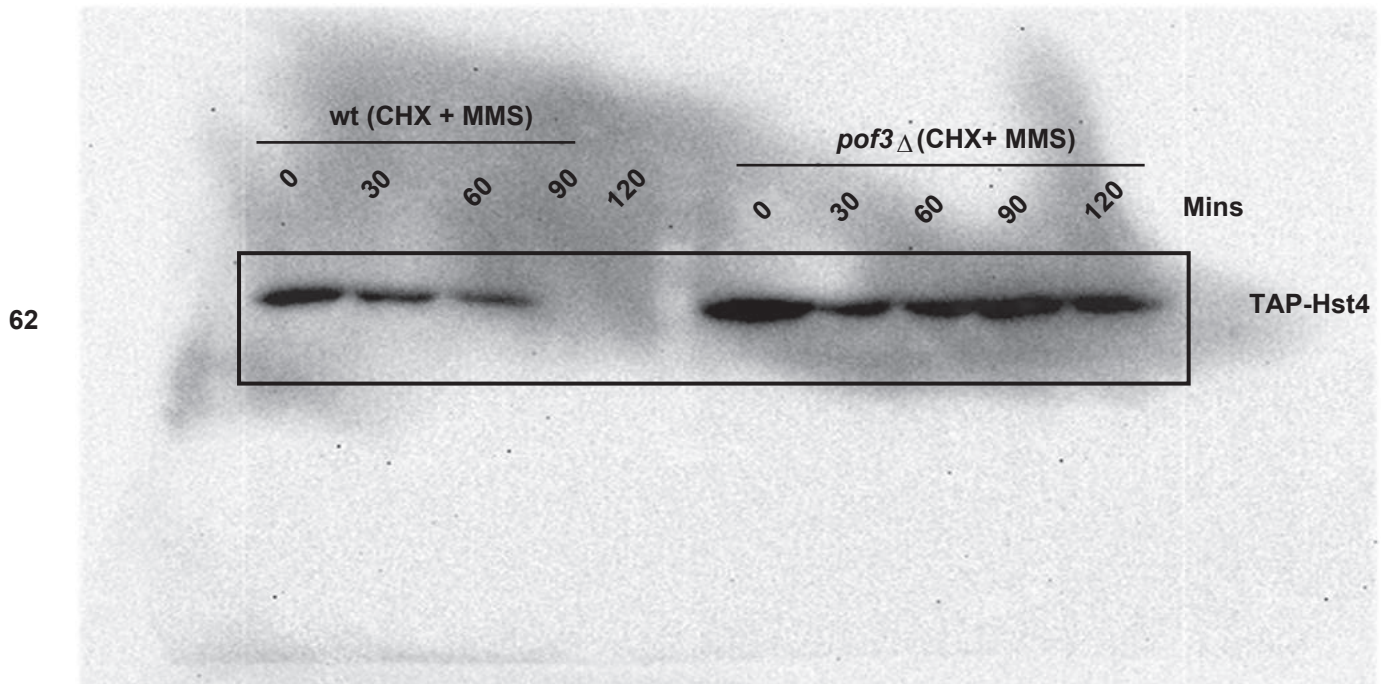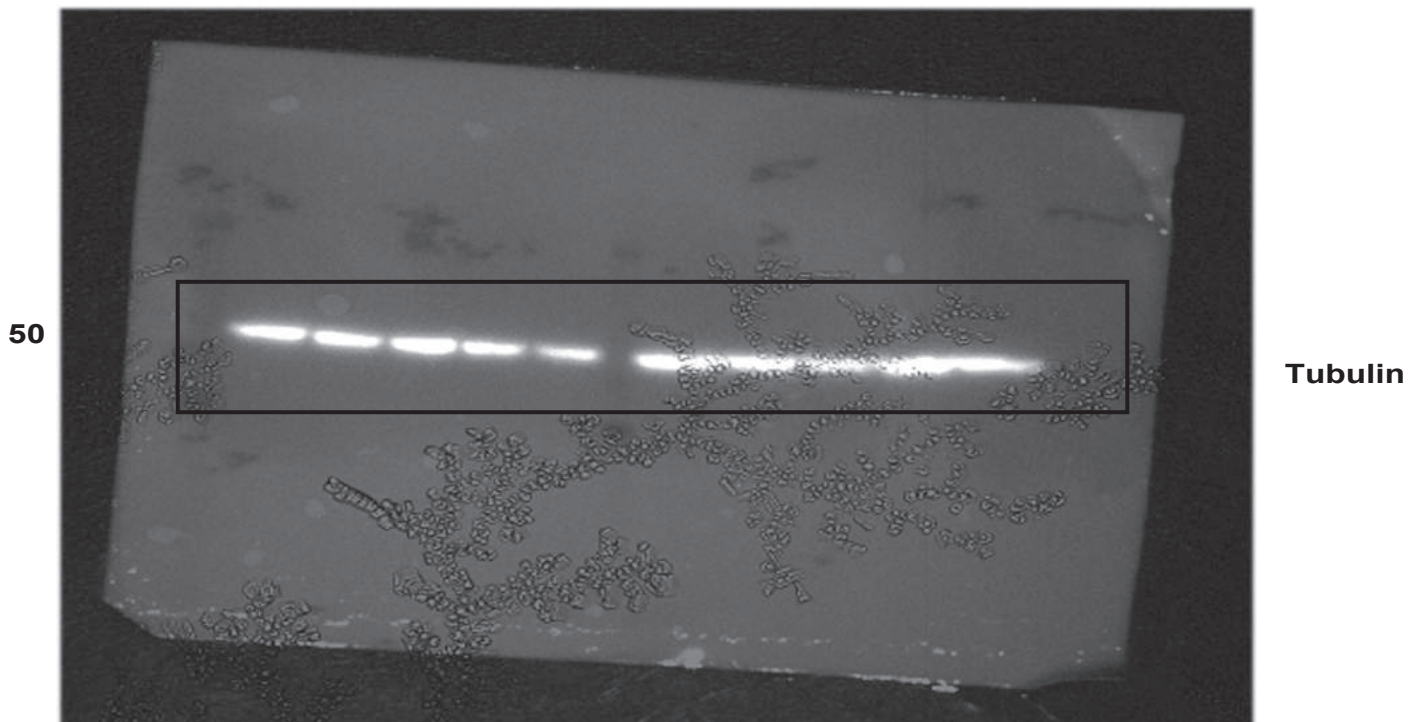

Figure 5C

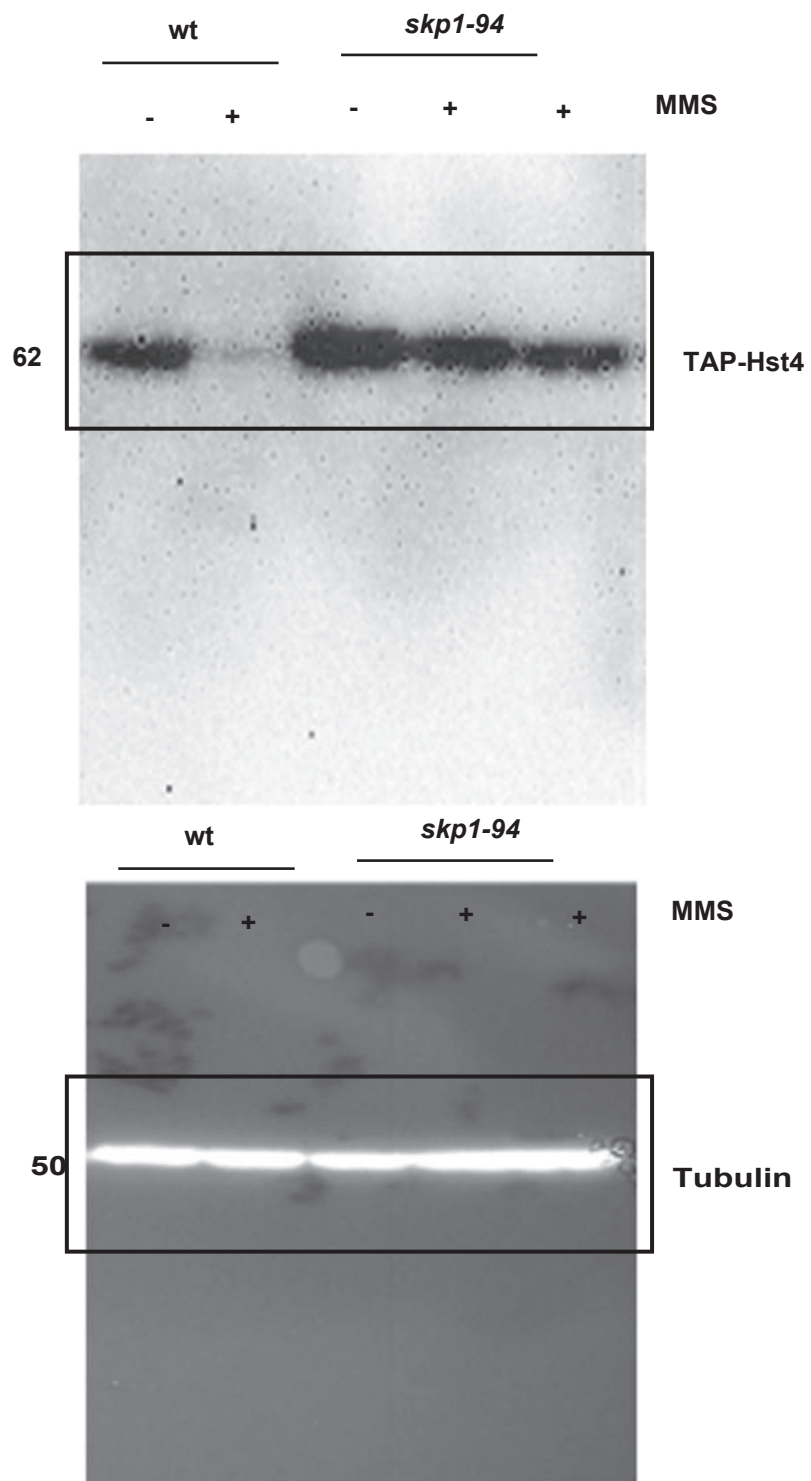



Figure 5-source data 1

Figure 5E

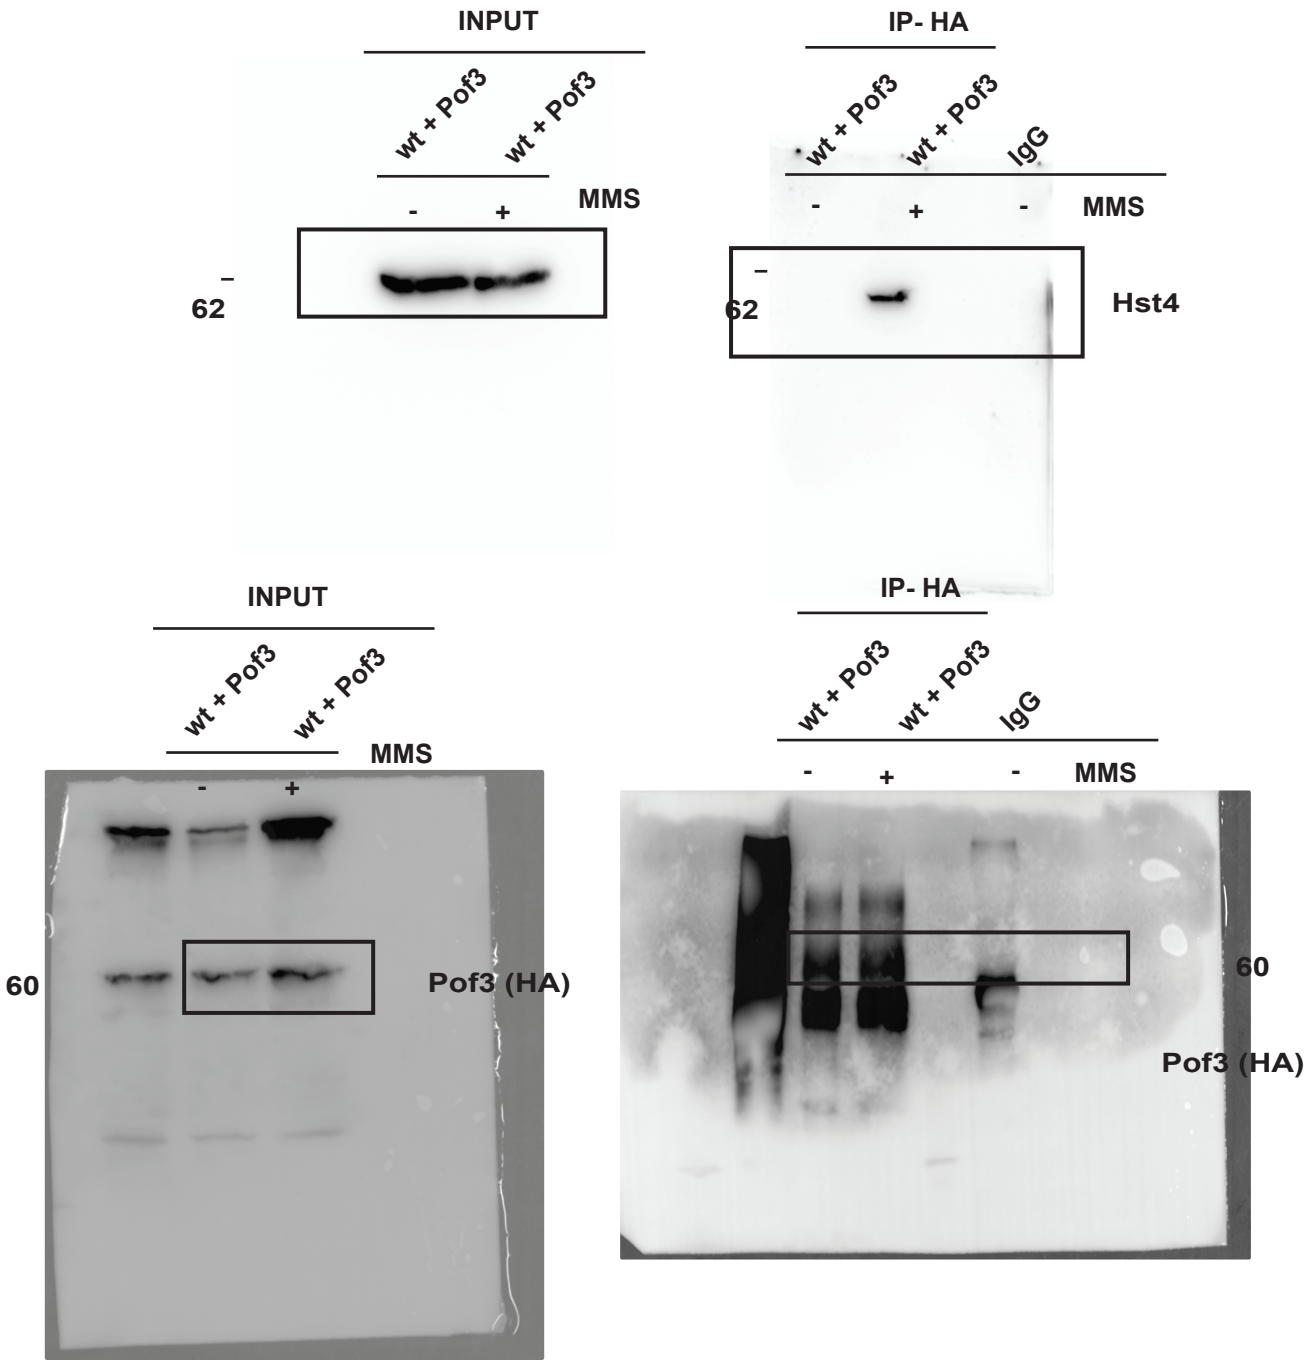

Figure 5-Figure Supplement 1C

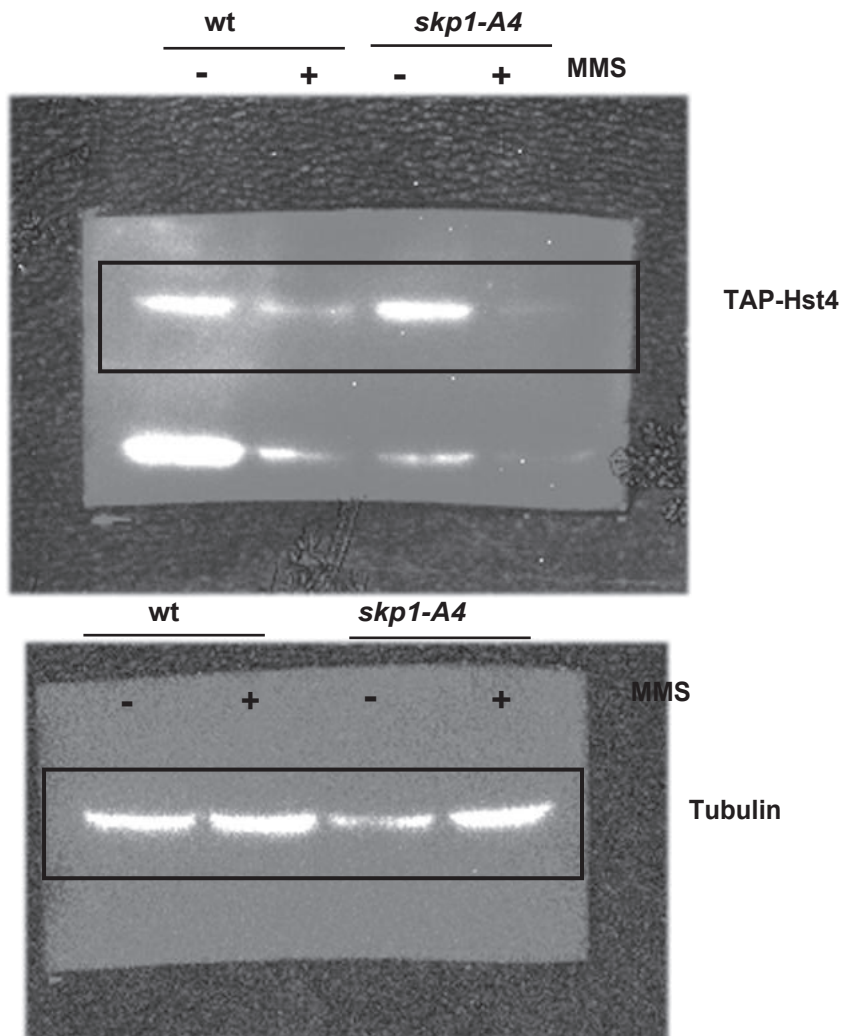

Figure 6-source data 1

Figure 6C

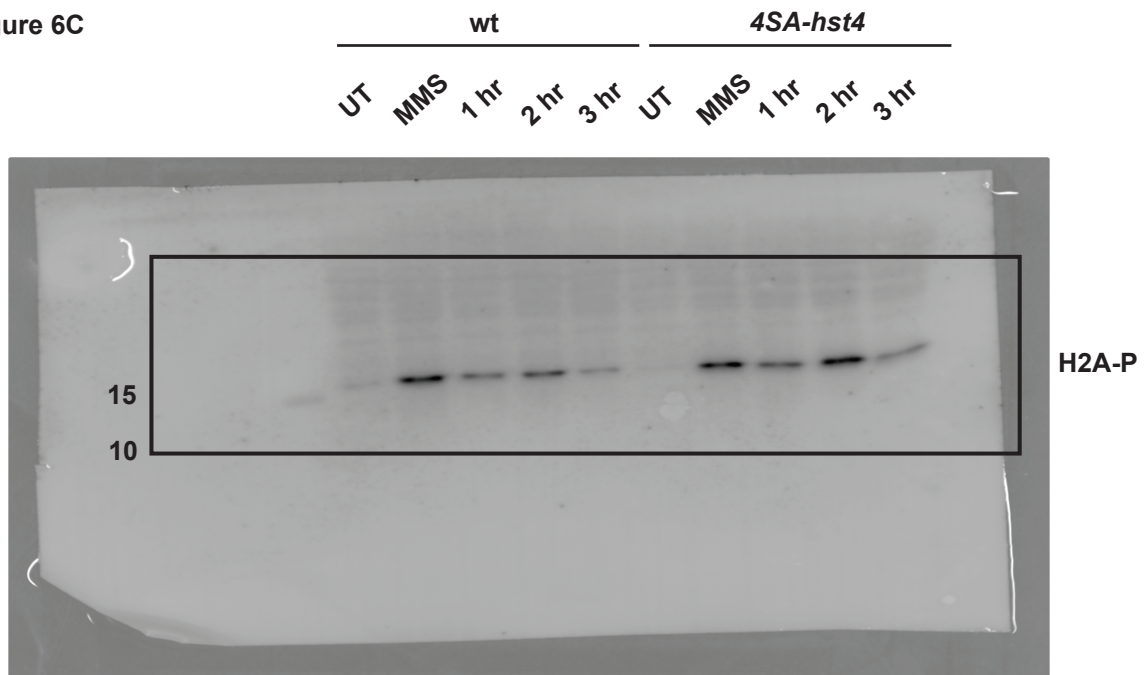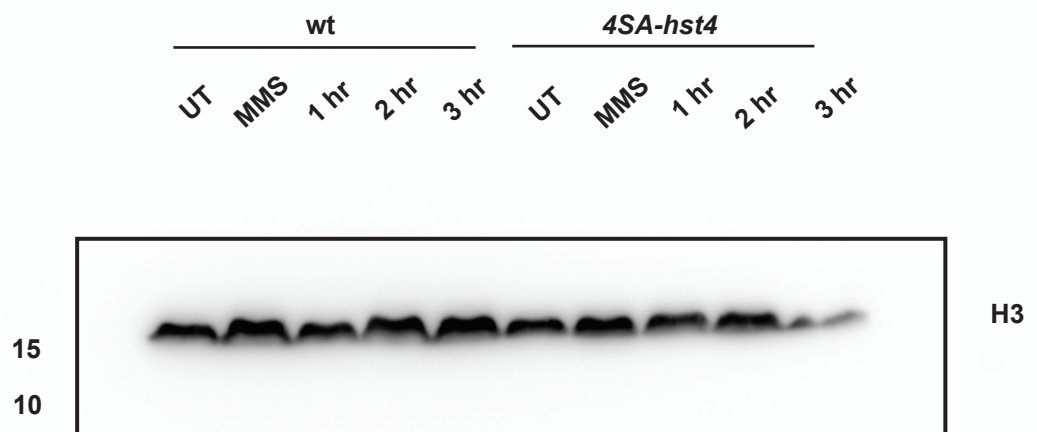

Figure 7-source data 1

Figure 7B

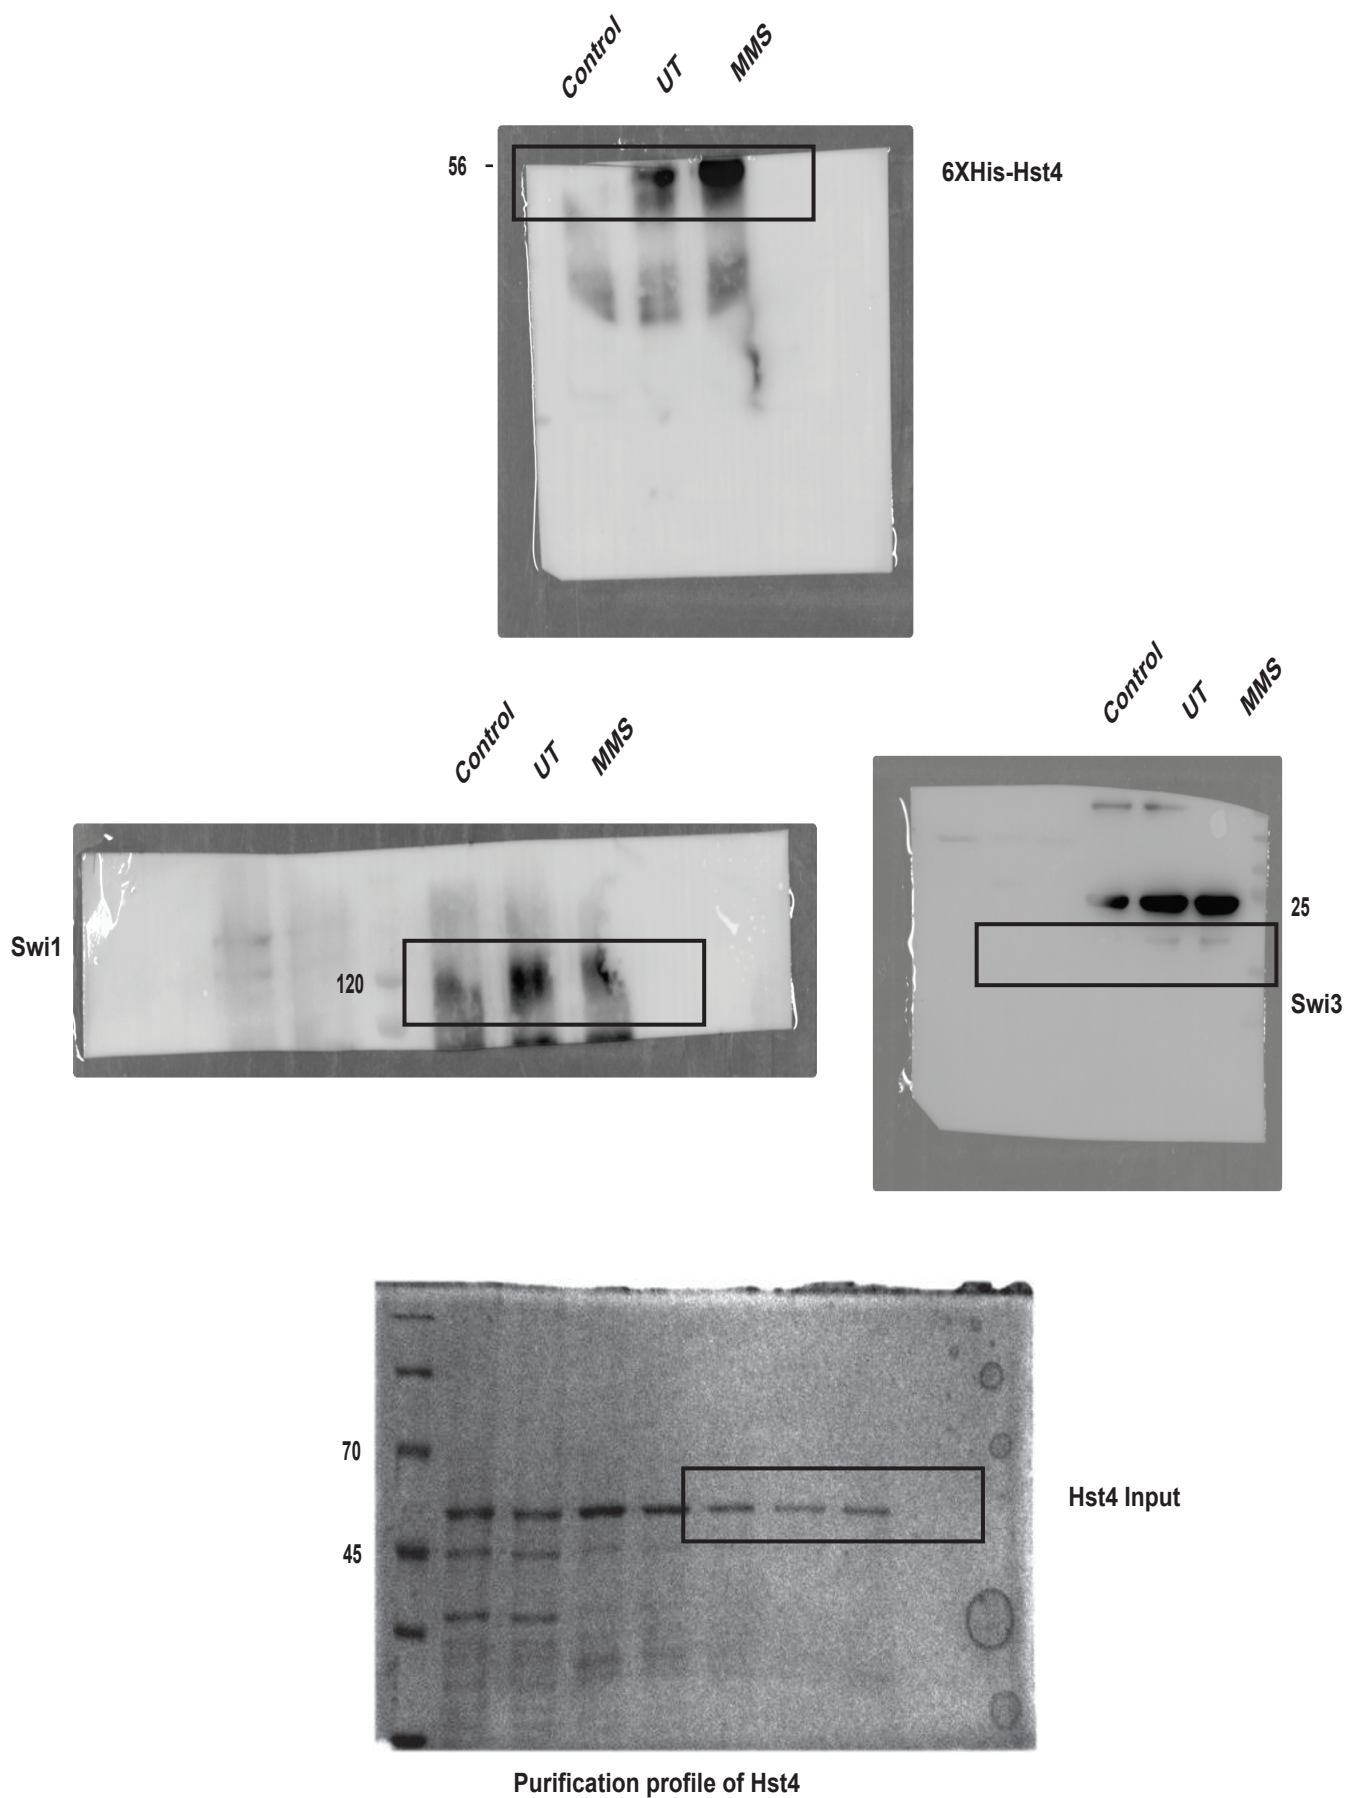

Figure 7-source data 1

Figure 7C

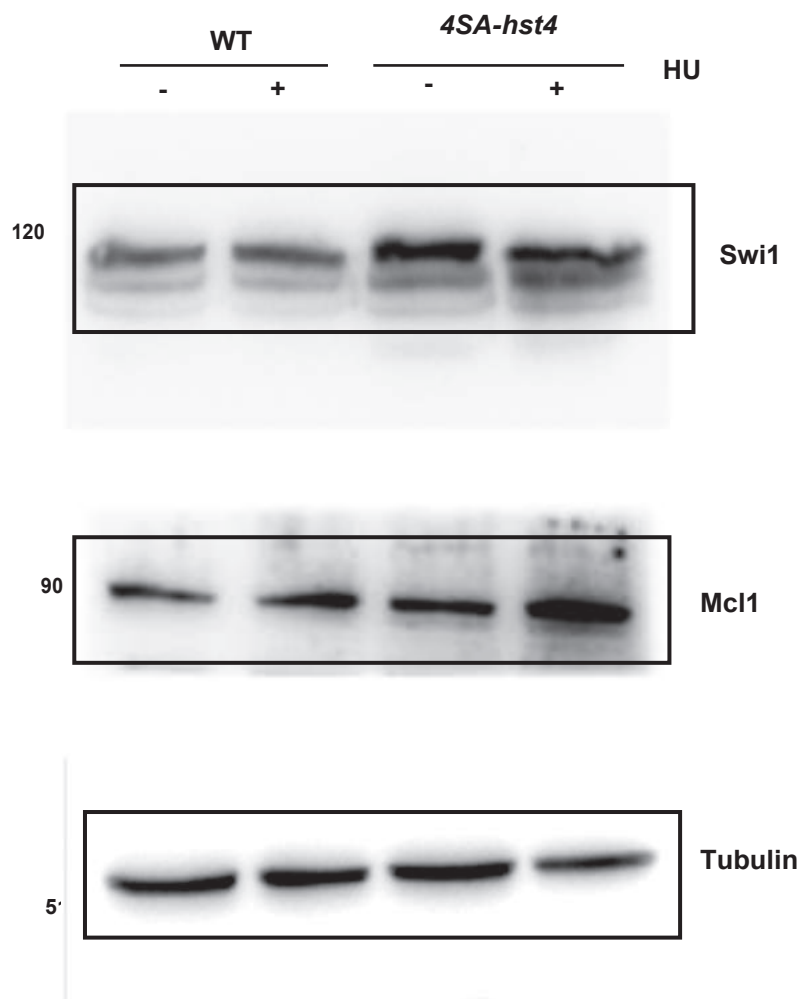

Figure 7-source data 1

Figure 7D

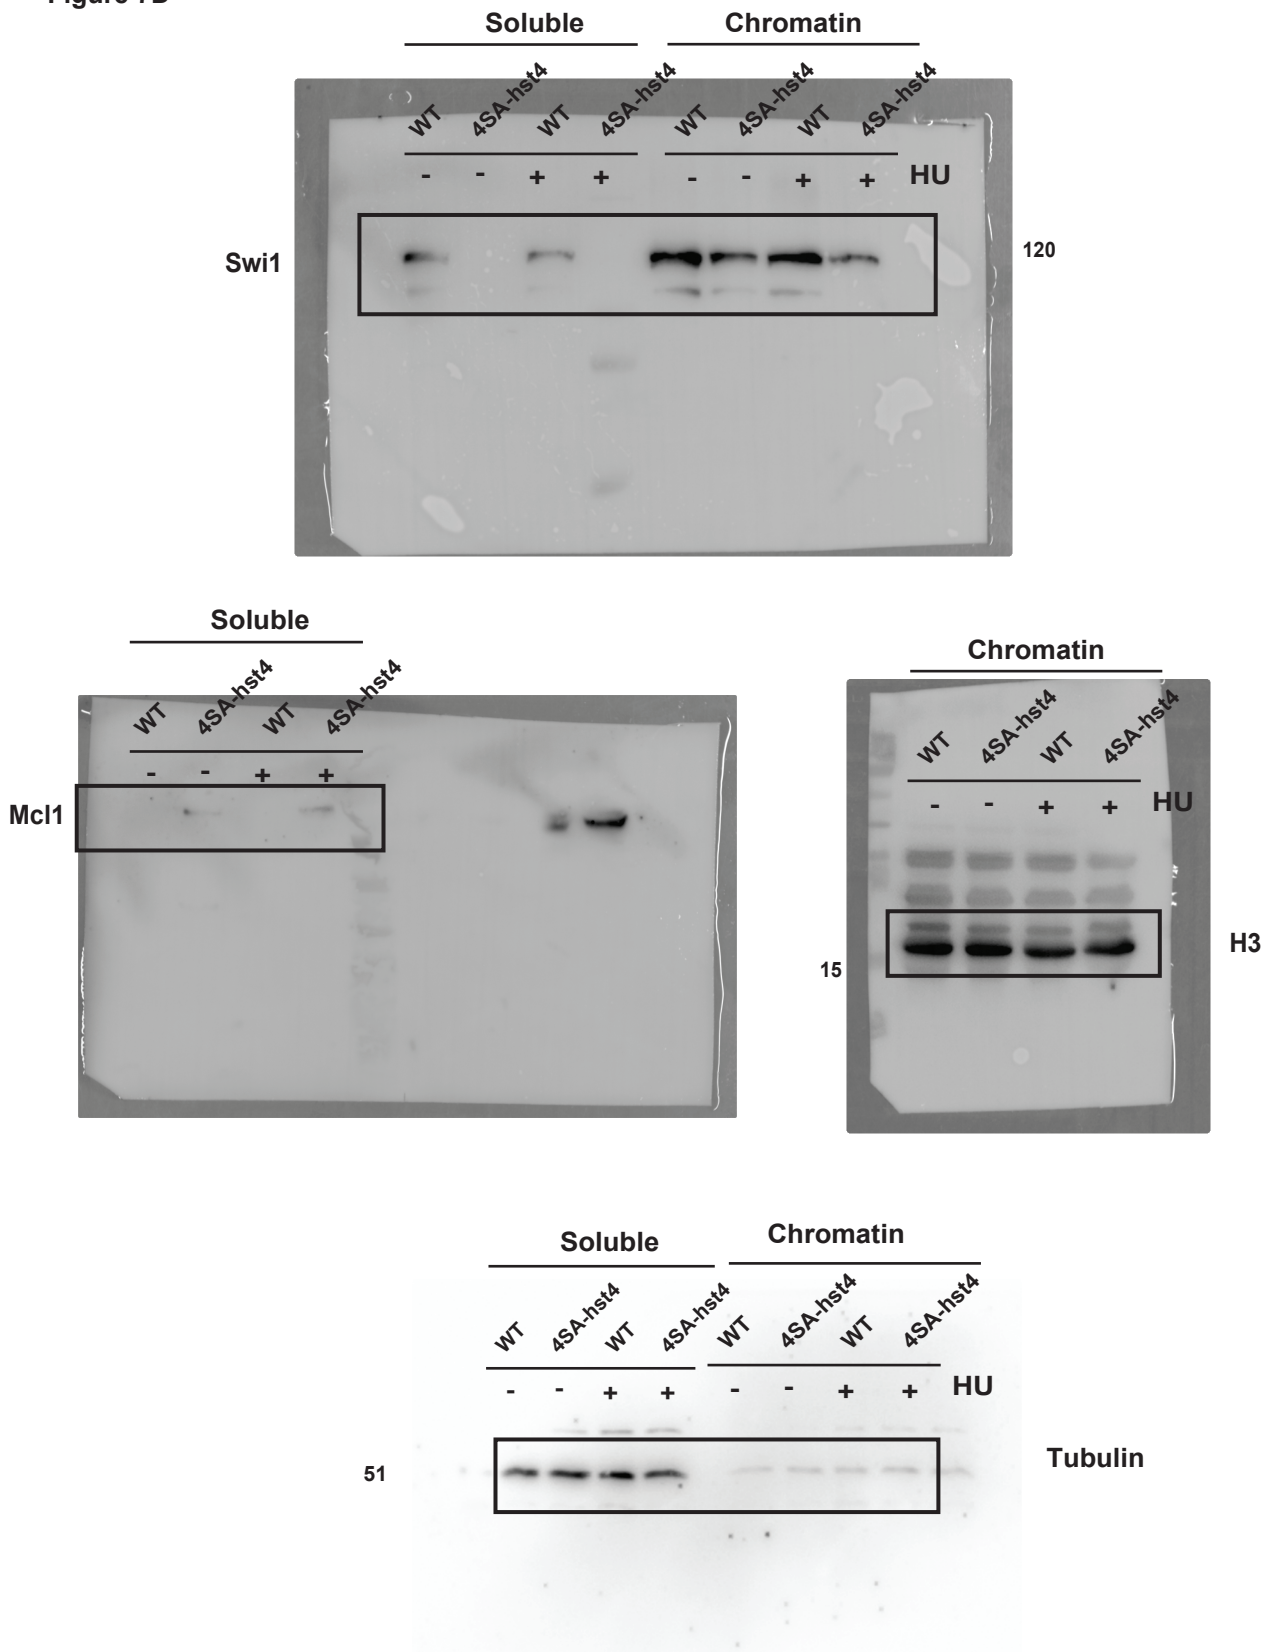

Figure 7-source data 1

Figure 7F

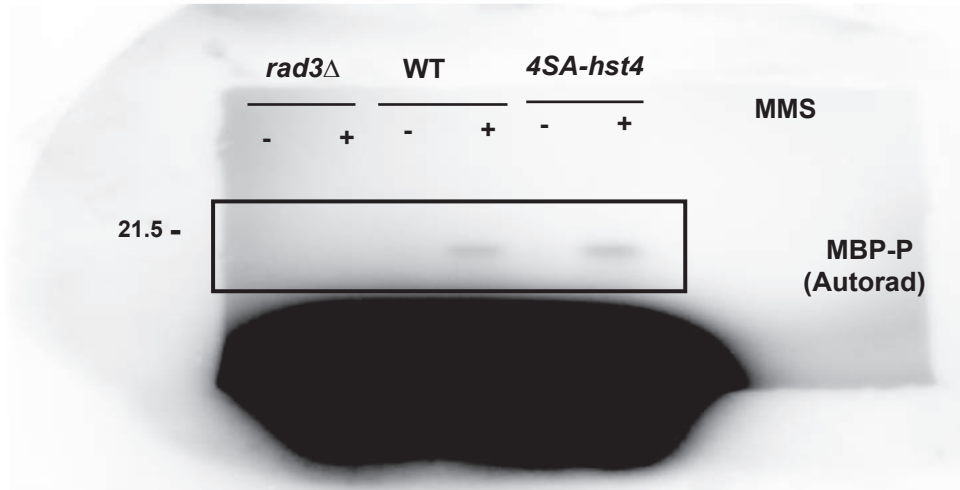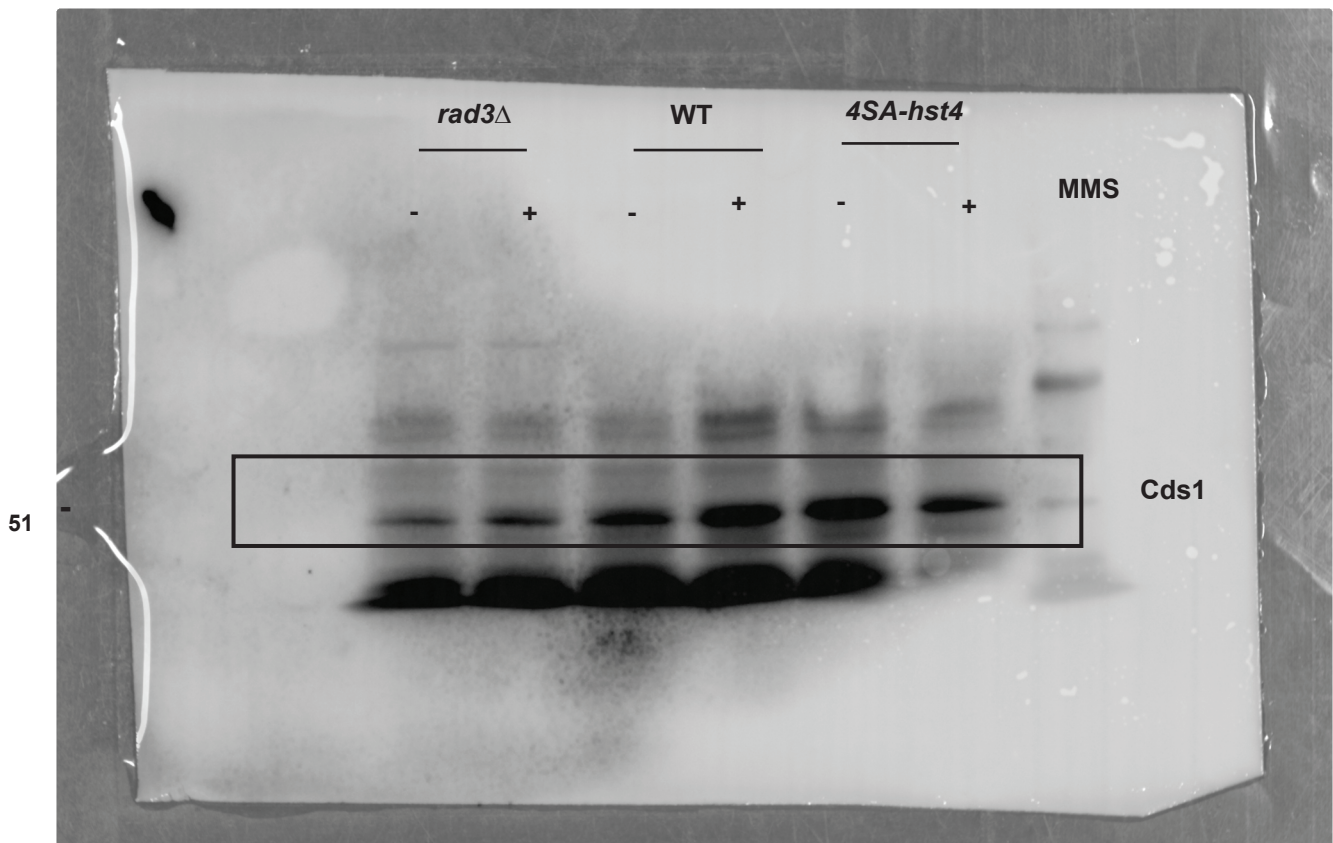

Figure 7-figure supplement 1-source data 1

Figure 7-figure supplement 1D

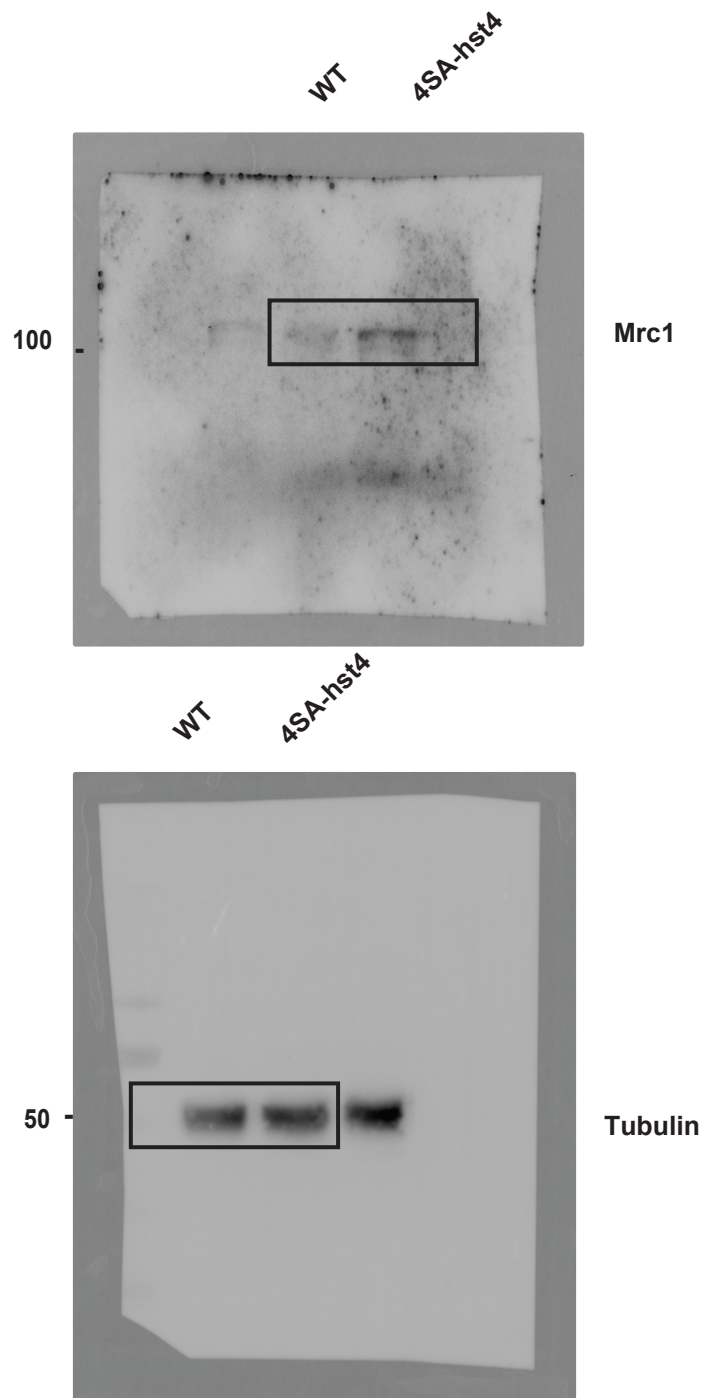



Figure 7-figure supplement 1E

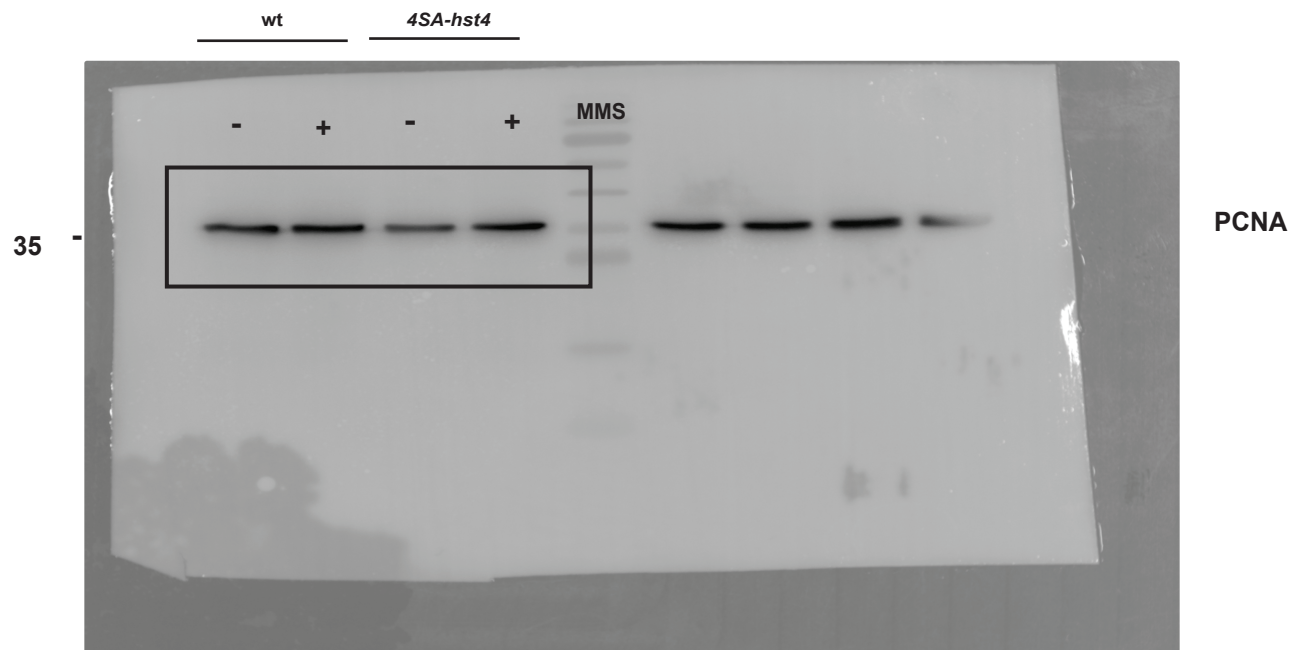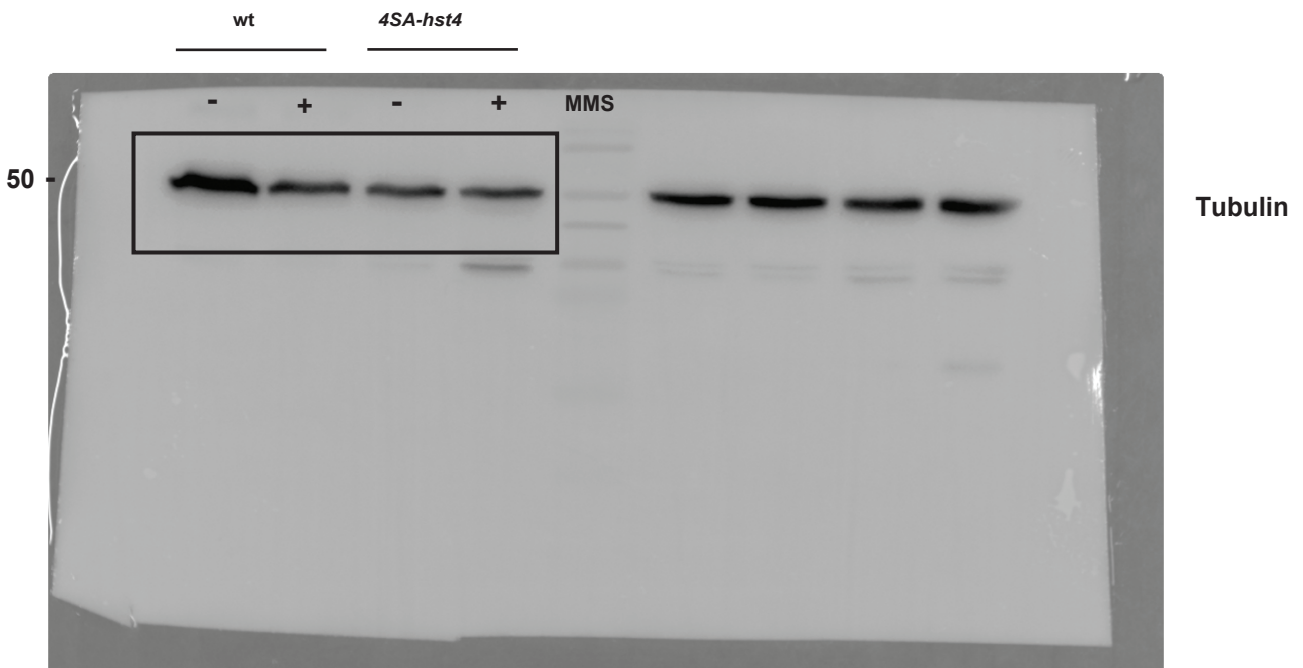

Figure 7-figure supplement 1-source data 1

Figure 7-figure supplement 1F

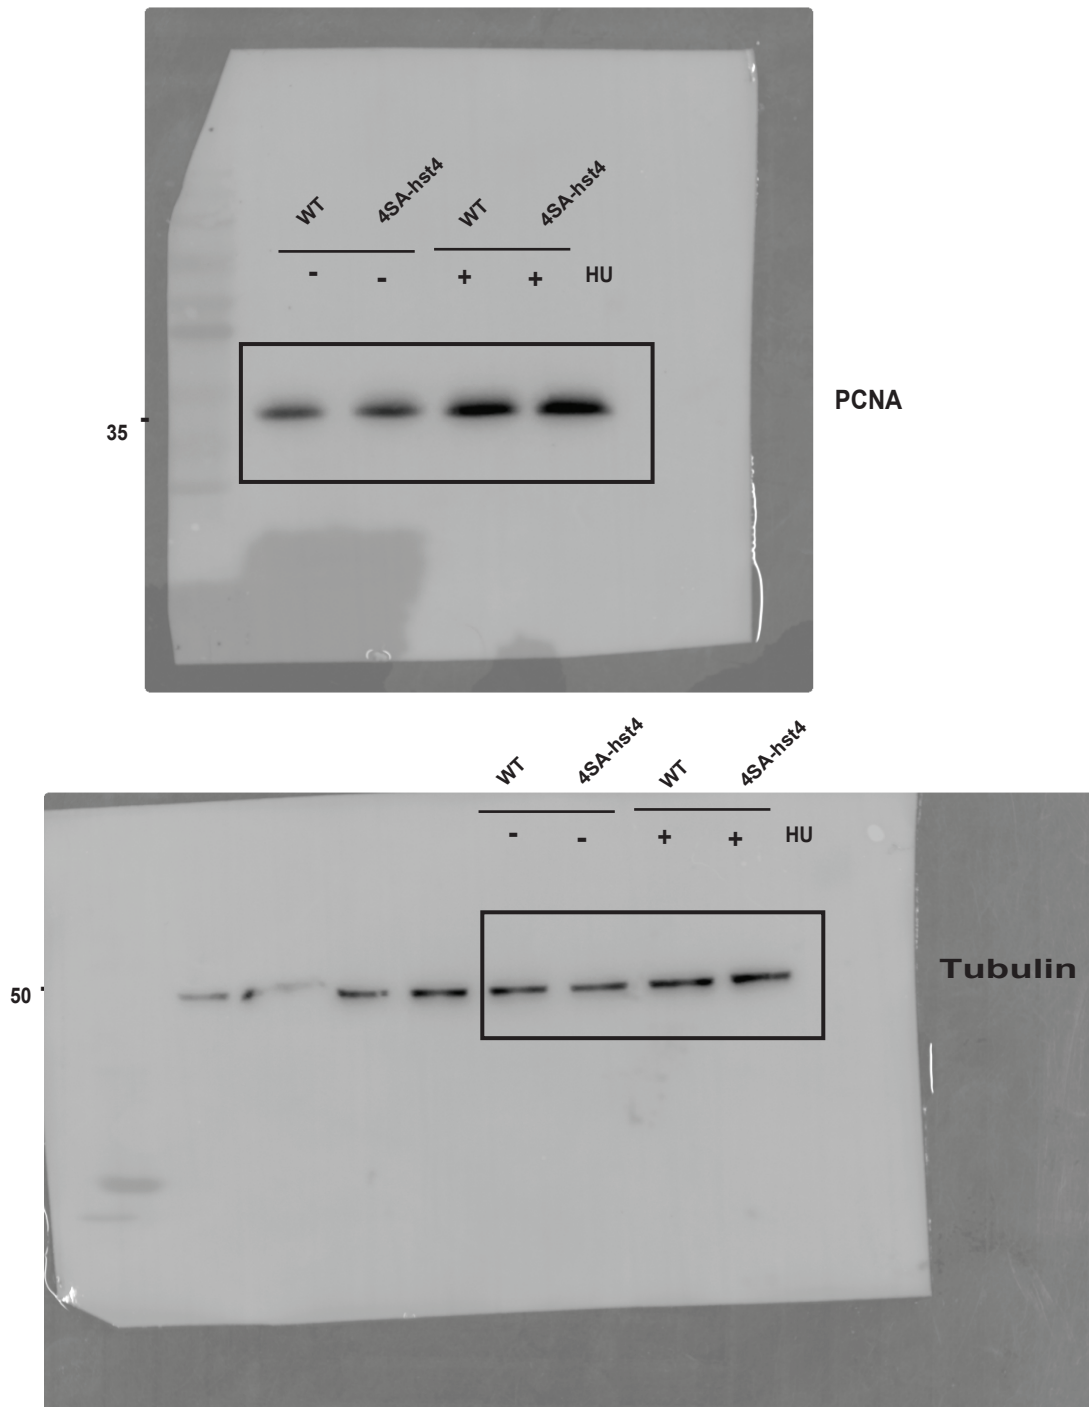

Figure 8-source data 1

Figure 8A

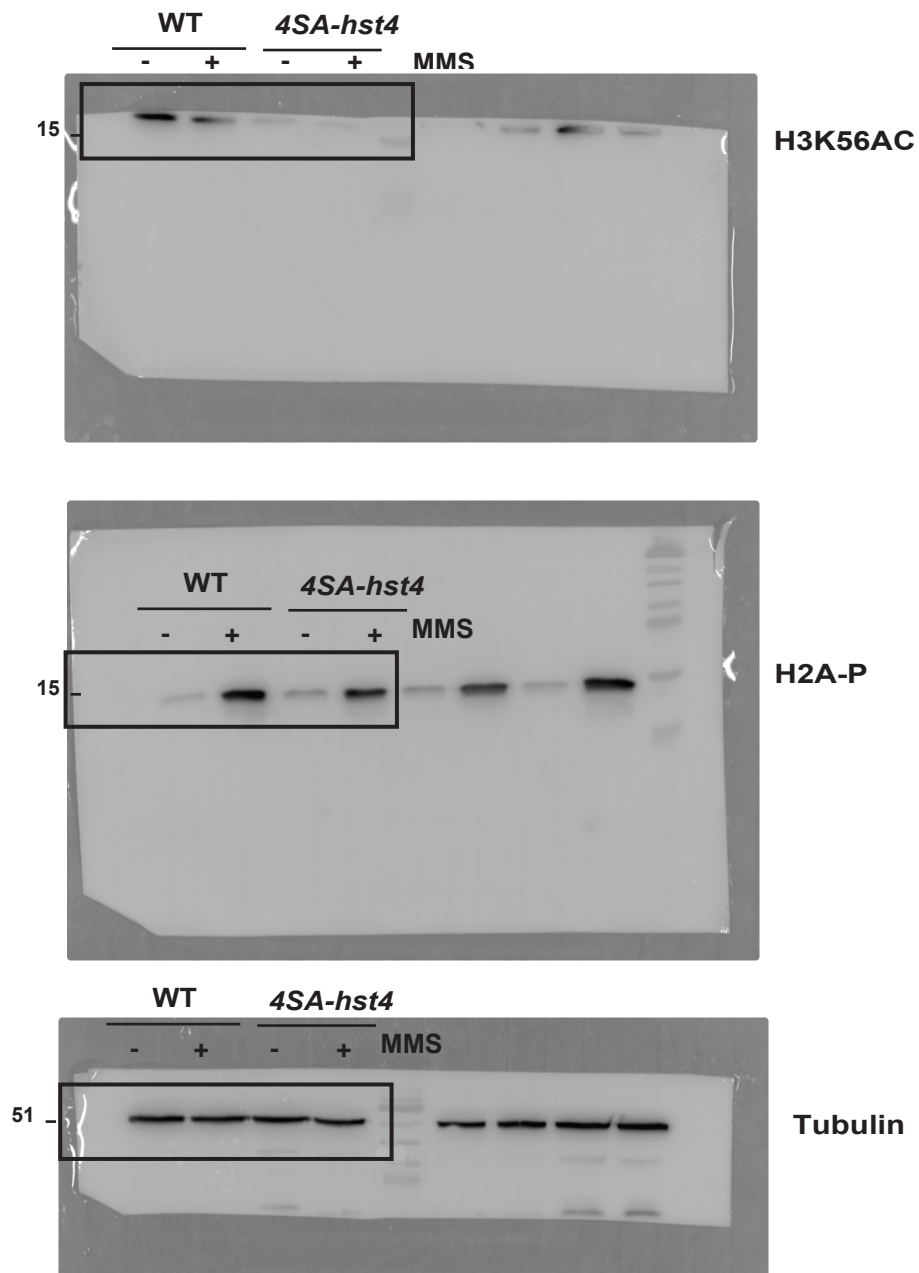

Figure 8-source data 1

Figure 8B

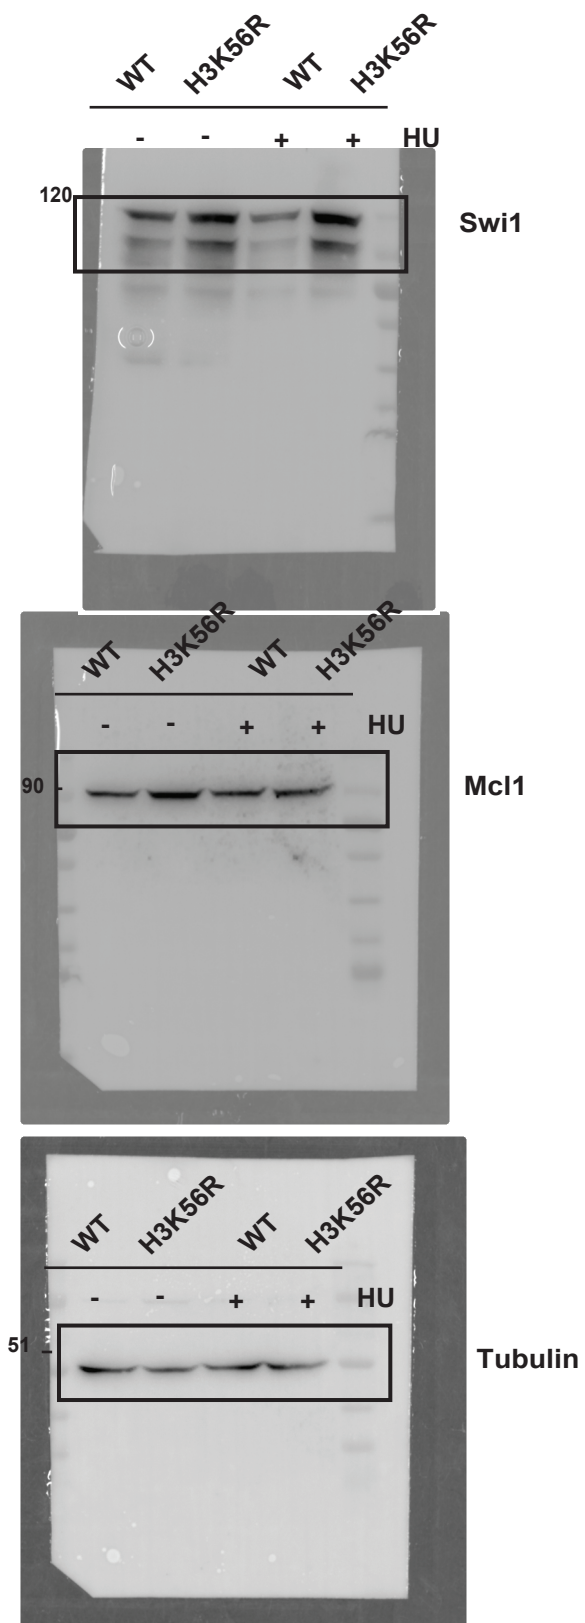

Figure 8-source data 1

Figure 8C

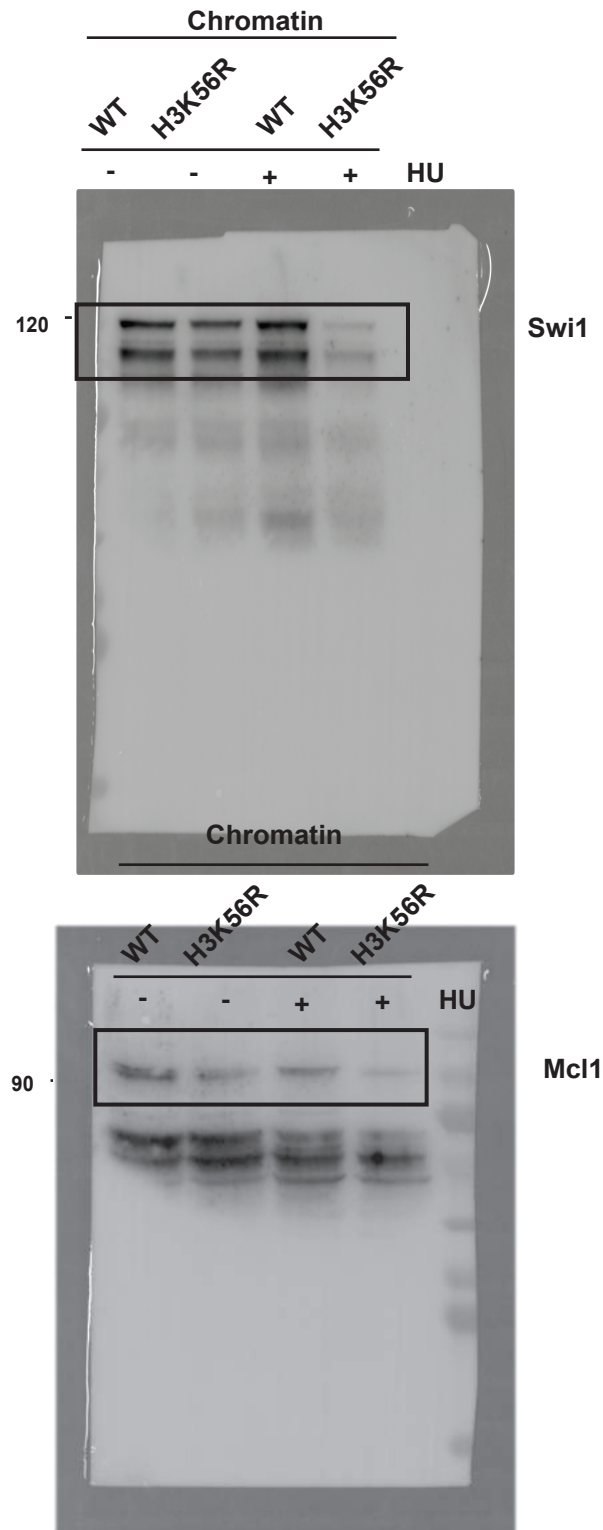

Figure 8-source data 1

Figure 8D

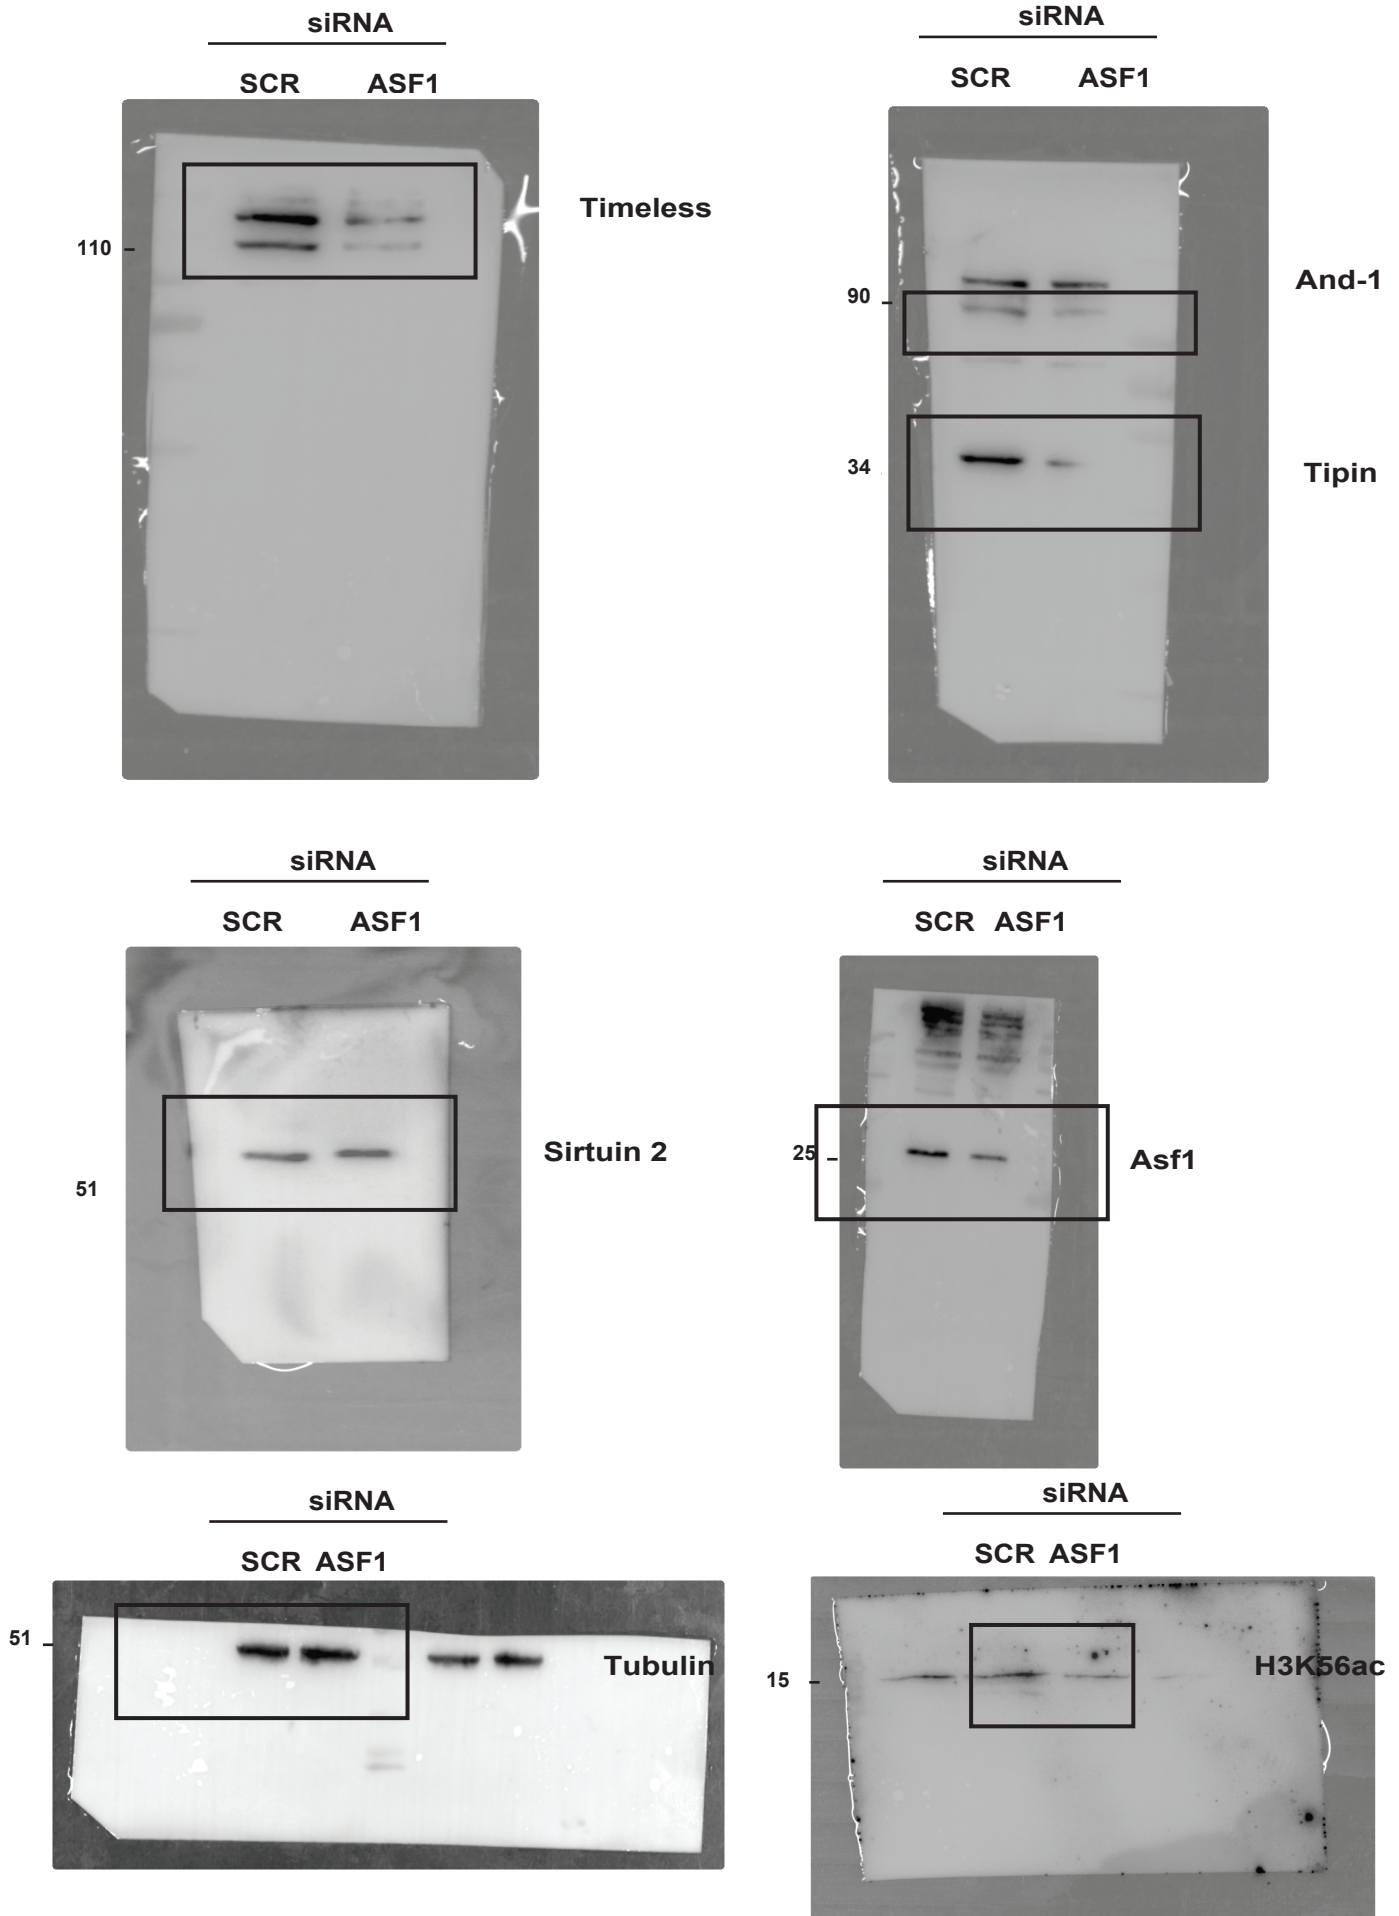

Figure 8-source data 1

Figure 8E

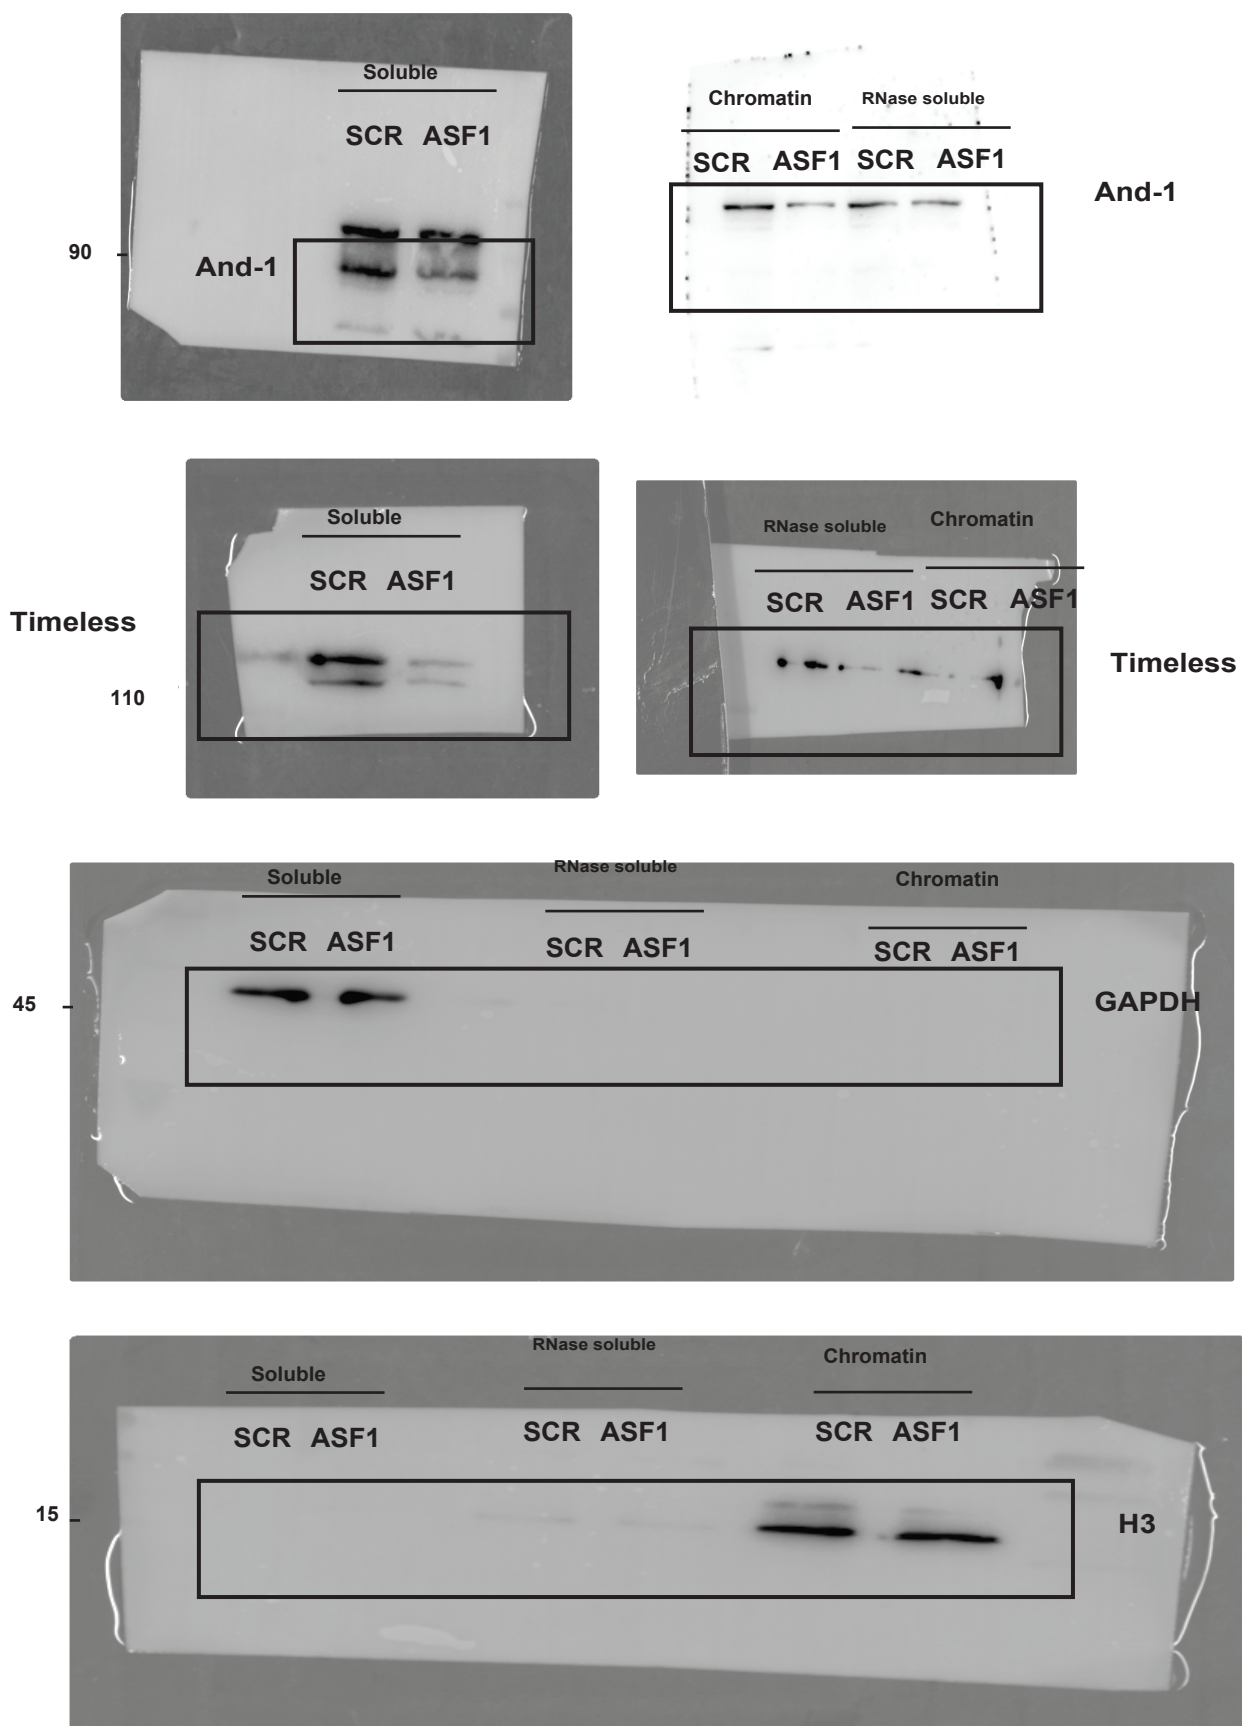

Figure 8-figure supplement 1-source data 1

Figure 8-figure supplement 1A

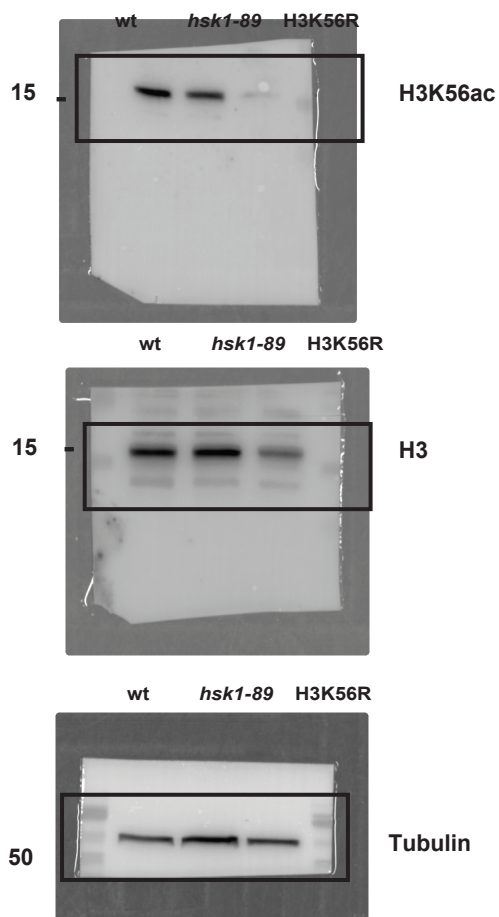



Figure 8-figure supplement 1-source data 1

Figure 8-figure supplement 1B

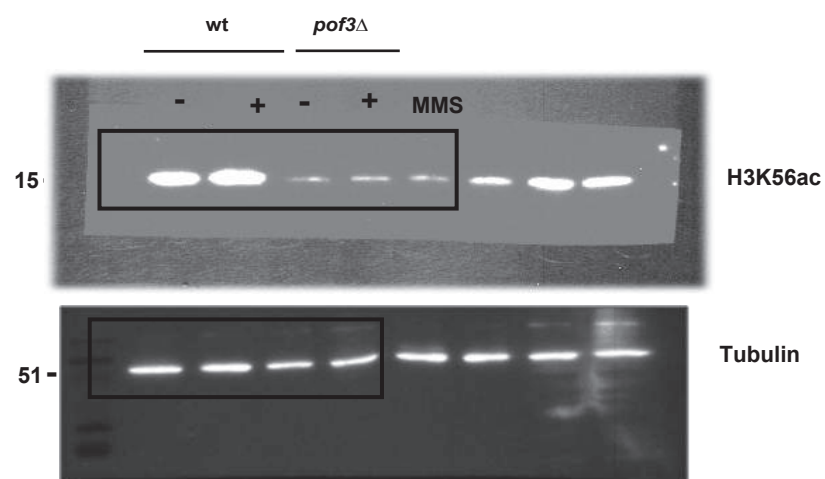

# CellSure-Human: Human Cell line Authentication Service

## Report

**Project ID:** M-1083  
**Service Code:** LC-M-321  
**Reference** PO No:  
**Service Order Form Dated:** 17/08/2016  
**Date** 08/09/2016  
**Prepared For** Dr. Rashna Bhandari  
Laboratory of Cell Signalling, CDFD  
Laboratory building, Tuljaguda complex,  
4-1-714, Mozamjahi Road, Nampally  
Hyderabad-500001  
**Prepared By** Gaurave Bhatt  
**Reviewed By** Jameel Ahamd Khan, PhD

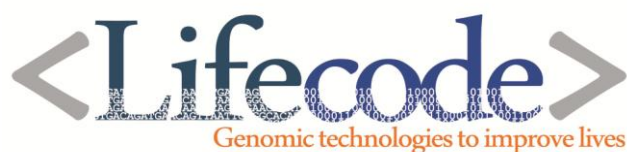

Lifecode Technologies Private Limited  
A5, Mohan Co-operative Industrial Estate, Mathura Road, New Delhi-110 044 (INDIA)  
Email: [info@lifecode.in](mailto:info@lifecode.in) | Phone: +91-11-41 306 509

## Sample Information

|                        |                                                     |
|------------------------|-----------------------------------------------------|
| Sample Type            | Cells suspended in Transport Buffer                 |
| Sample IDs             | 1. RB-1                                             |
| Shipping Method        | Sample received through courier at room temperature |
| Receiving Date:        | 22/08/2016                                          |
| Report submission date | 08-09-2016                                          |

## Methodology

The total cellular DNA was isolated using our standard protocol. For STR profiling, total ten Genetic loci viz: TH01, D21S11, D5S818, D13S317, D7S820, D16S539, CSF1PO, AMEL, vWA and TPOX were PCR amplified by labelled primers specific to repetitive loci. The labelled amplicons were resolved by capillary electrophoresis and alleles were called. The sample genotypes were compared with reference STR genotypes available in ATCC®, DSMZ® and Biosample databases to authenticate sample identity and check for cross contamination.

## Results

### Genotypes:

| S. No | Sample ID | Cell Line Name | Ref Db ID |                                  | D5S818 | D13S317 | D7S820 | D16S539 | vWA    | TH01   | AMEL | TPOX   | CSF1PO | D21S11   | % Match with Ref. |
|-------|-----------|----------------|-----------|----------------------------------|--------|---------|--------|---------|--------|--------|------|--------|--------|----------|-------------------|
| 1.    | RB-1      | U-2 OS         | HTB-96    | Ref. Genotype (ATCC & Biosample) | 11     | 13      | 11, 12 | 11, 12  | 14, 18 | 6, 9.3 | X    | 11, 12 | 13     | 31       |                   |
|       |           |                |           | Sample Genotype                  | 11     | 13      | 11, 12 | 11, 12  | 14, 18 | 6, 9.3 | X    | 11, 12 | 12, 13 | 31       | 93.75             |
| 2.    | Pos Ctrl  | 2800M          | -         | Ref. Genotype (Promega)          | 12     | 9, 11   | 8, 11  | 9, 13   | 16, 19 | 6, 9.3 | X, Y | 11     | 12     | 29, 31.2 |                   |
|       |           |                |           | Sample Genotype                  | 12     | 9, 11   | 8, 11  | 9, 13   | 16, 19 | 6, 9.3 | X, Y | 11     | 12     | 29, 31.2 | 100               |

## Comments:

1. **RB-1:** The STR marker profile of the sample matches with **93.75 % markers** of reference marker profile of U-2 OS (ATCC ID: HTB-96) cell line in NCBI-Biosample and **93.33%** markers in ATCC database (please also see additional data). According to ATCC guidelines >80 % match **may be considered to be authenticated.**

However, it should be noted that the reason for not getting perfect (100 %) match is because of loss and/or gain of alleles at loci: CSF1PO (please see the highlighted markers in above table). This could be either because of sample from very high passage number or clonally selected cells, from a cell line of inherently very unstable genome. **For such cell lines, the STR profiling at regular intervals to check whether the current STR signature is maintained with increase in passage number of cells, is highly recommended.**

However, it may also be a potential case of cross-contamination and/or mislabelling and should be checked at a later passage especially if another cell line with related STR marker profile (please see DSMZ database search results in additional information) is being cultured in same lab. It may also be a laboratory developed cell line from patient samples which is not yet submitted in ATCC, DSMZ, JCRB and RIKEN databases and requires further characterization.

Date: 08-09-2016

Jameel A. Khan, PhD

**NOTE: THIS REPORT IS FOR RESEARCH PURPOSES ONLY. IT CAN NOT BE USED FOR TECHNO-LEGAL OR ANY OTHER PURPOSES.**

# Additional Data

## Chromatograms

### Allelic Ladder

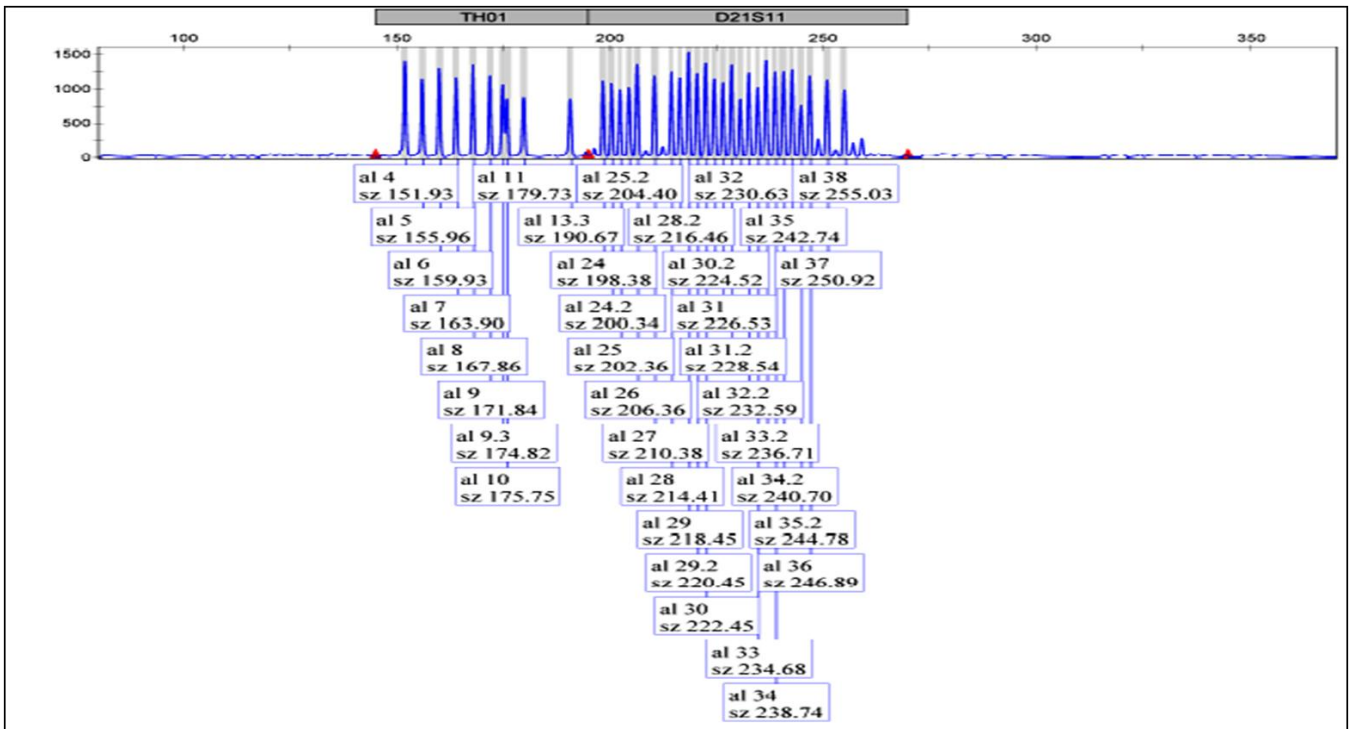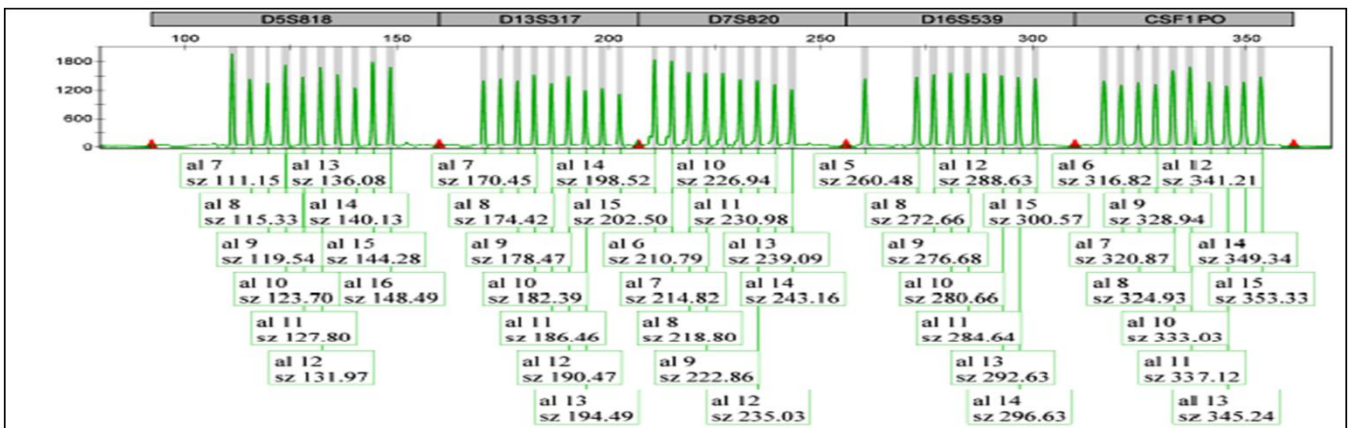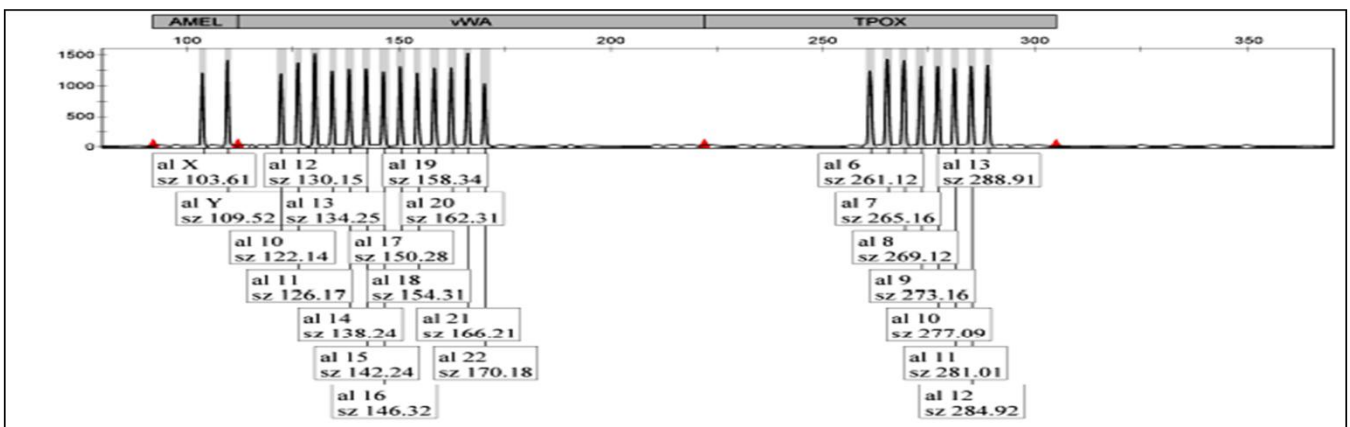

1- RB-1

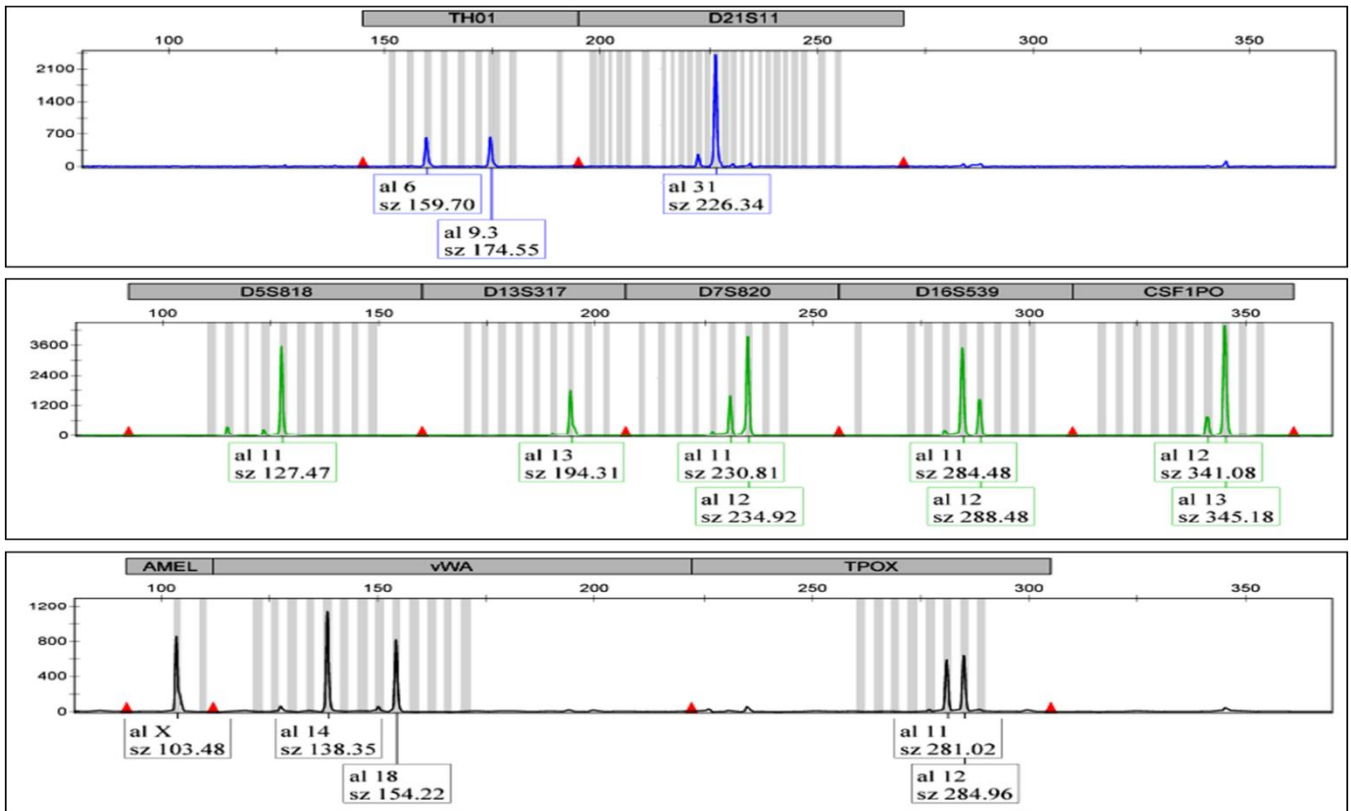

2- Positive Ctrl

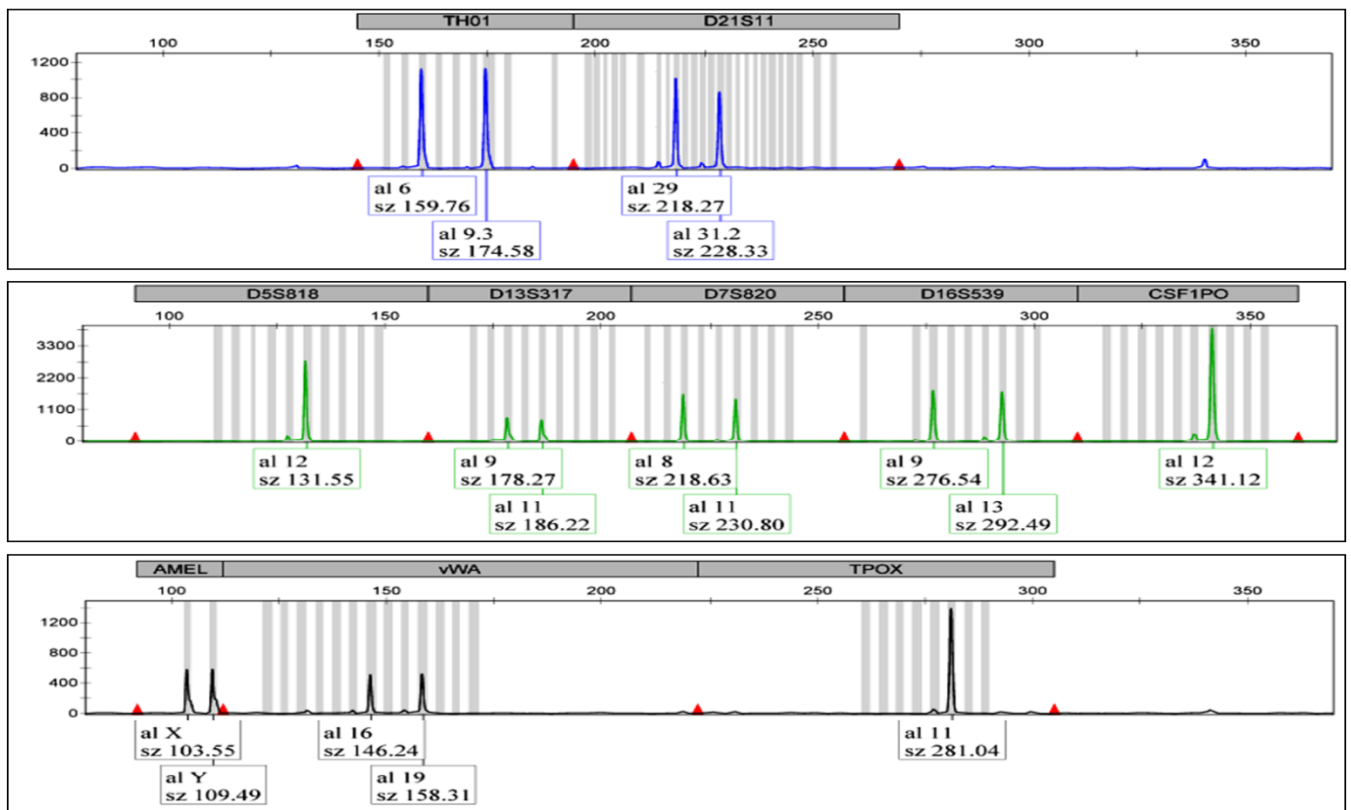

## Database Search Results: ATCC

### 1- RB-1

| S. No.   | % Match | No of Matches | ATCC Number                       | Designation | D5S818           | D13S317   | D7S820            | D16S539           | vWA               | TH01              | AMEL     | TPOX              | CSF1PO            |
|----------|---------|---------------|-----------------------------------|-------------|------------------|-----------|-------------------|-------------------|-------------------|-------------------|----------|-------------------|-------------------|
|          |         |               | <b>RB-1<br/>(sample genotype)</b> |             | <b>11</b>        | <b>13</b> | <b>11,<br/>12</b> | <b>11,<br/>12</b> | <b>14,<br/>18</b> | <b>6,<br/>9.3</b> | <b>X</b> | <b>11,<br/>12</b> | <b>12,<br/>13</b> |
| <b>1</b> | 93.33   | 14            | HTB-96                            | U-2 OS      | 11               | 13        | 11,<br>12         | 11,<br>12         | 14,<br>18         | 6,<br>9.3         | X        | 11,<br>12         | 13                |
| <b>2</b> | 93.75   | 15            | 785                               | U-2-OS      | <b>8,<br/>11</b> | 13        | 11,<br>12         | 11,<br>12         | 14,<br>18         | 6,<br>9.3         | X        | 11,<br>12         | 12,<br>13         |

## Database Search Results: DSMZ (top 30 hits)

### 1- RB-1

| S. No. | EV (Expected Value) | Cell No.                          | Designation    | D5S818    | D13S317          | D7S820            | D16S539           | vWA               | TH01              | AMEL     | TPOX              | CSF1PO            |
|--------|---------------------|-----------------------------------|----------------|-----------|------------------|-------------------|-------------------|-------------------|-------------------|----------|-------------------|-------------------|
|        |                     | <b>RB-1<br/>(sample genotype)</b> |                | <b>11</b> | <b>13</b>        | <b>11,<br/>12</b> | <b>11,<br/>12</b> | <b>14,<br/>18</b> | <b>6,<br/>9.3</b> | <b>X</b> | <b>11,<br/>12</b> | <b>12,<br/>13</b> |
| 1      | 0.94(34/36)         | 785                               | U-2-OS         | 8, 11     | 13,<br>13        | 11,<br>12         | 11,<br>12         | 14,<br>18         | 6,<br>9.3         | X, X     | 11,<br>12         | 12,<br>13         |
| 2      | 0.94(34/36)         | HTB-96                            | U-2 OS         | 11,<br>11 | 13,<br>13        | 11,<br>12         | 11,<br>12         | 14,<br>18         | 6,<br>9.3         | X, X     | 11,<br>12         | 13,<br>13         |
| 3      | 0.67(24/36)         | 326                               | SW-948         | 11,<br>11 | 10,<br>11        | 9, 11             | 11,<br>12         | 16,<br>18         | 6,<br>9.3         | X, X     | 8, 11             | 12,<br>12         |
| 4      | 0.67(24/36)         | CCL-237                           | SW948 [SW-948] | 11,<br>11 | 10,<br>11        | 9, 11             | 11,<br>12         | 16,<br>18         | 6,<br>9.3         | X, X     | 8, 11             | 12,<br>12         |
| 5      | 0.67(24/36)         | CRL-5975                          | UMC-11         | 11,<br>11 | 8, 13            | 9, 11             | 11,<br>12         | 14,<br>15         | 6,<br>9.3         | X, Y     | 9, 11             | 12,<br>12         |
| 6      | 0.67(24/36)         | CRL-7242                          | Hs 329.T       | 11,<br>13 | 9, 11            | 11,<br>12         | 11,<br>12         | 17,<br>18         | 6,<br>9.3         | X, X     | 8, 11             | 11,<br>12         |
| 7      | 0.67(24/36)         | JCRB1020                          | RERF-LC-Ad1    | 12,<br>12 | 13,<br>13        | 11,<br>12         | 9, 12             | 14,<br>17         | 6, 9              | X, X     | 8, 11             | 12,<br>13         |
| 8      | 0.67(24/36)         | RCB2107                           | TN-1           | 10,<br>11 | 8, 13            | 11,<br>12         | 11,<br>12         | 14,<br>19         | 6, 6              | X, X     | 8, 11             | 11,<br>12         |
| 9      | 0.67(24/36)         | RCB2260                           | HE41           | 11,<br>11 | 8, 11            | 11,<br>11         | 9, 12             | 14,<br>18         | 6, 7              | X, X     | 8, 11             | 12,<br>13         |
| 10     | 0.65(24/37)         | RCB1021                           | T3M-4          | 11,<br>11 | 10,<br>13        | 12,<br>12         | 11,<br>12         | 18,<br>19,<br>21  | 9.3,<br>9.3       | X, X     | 11,<br>12         | 10,<br>10         |
| 11     | 0.65(24/37)         | RCB1426                           | PMF-ko14       | 11,<br>11 | 13,<br>14,<br>15 | 8, 8              | 11,<br>12         | 17,<br>18         | 9.3,<br>9.3       | X, X     | 11,<br>12         | 10,<br>12         |
| 12     | 0.63(24/38)         | 665                               | UPCI-SCC-099   | 11,<br>12 | 8, 13            | 7, 9,<br>10       | 11,<br>12         | 14,<br>18,<br>19  | 6,<br>9.3         | X, X     | 11,<br>11         | 11,<br>12         |
| 13     | 0.61(22/36)         | 182                               | COLO-680N      | 11,<br>11 | 13,<br>13        | 10,<br>12         | 11,<br>12         | 17,<br>18         | 8, 8              | X, X     | 6, 8              | 11,<br>12         |
| 14     | 0.61(22/36)         | 185                               | LCL-HO         | 11,<br>11 | 13,<br>13        | 8, 12             | 13,<br>13         | 14,<br>18         | 7,<br>9.3         | X, X     | 9, 11             | 9, 11             |



|    |             |          |                        |           |           |           |           |                  |             |      |           |           |
|----|-------------|----------|------------------------|-----------|-----------|-----------|-----------|------------------|-------------|------|-----------|-----------|
| 15 | 0.61(22/36) | 255      | CADO-ES1               | 11,<br>12 | 10,<br>13 | 11,<br>13 | 9, 11     | 14,<br>18        | 6, 9        | X, X | 8, 11     | 11,<br>12 |
| 16 | 0.61(22/36) | 294      | SW-403                 | 11,<br>11 | 13,<br>13 | 8, 9      | 10,<br>12 | 14,<br>18        | 6, 6        | X, X | 8, 9      | 10,<br>13 |
| 17 | 0.61(22/36) | 557      | ROS-50                 | 11,<br>11 | 8, 13     | 10,<br>11 | 8, 12     | 17,<br>18        | 6,<br>9.3   | X, Y | 11,<br>11 | 11,<br>12 |
| 18 | 0.61(22/36) | 721      | NCEB-1                 | 9, 11     | 12,<br>12 | 10,<br>11 | 9, 10     | 14,<br>18        | 6,<br>9.3   | X, X | 11,<br>11 | 12,<br>13 |
| 19 | 0.61(22/36) | CCL-230  | SW403 [SW-403]         | 11,<br>11 | 13,<br>13 | 8, 9      | 10,<br>12 | 14,<br>18        | 6, 6        | X, X | 8, 9      | 10,<br>13 |
| 20 | 0.61(22/36) | CRL-1635 | Hs68                   | 8, 11     | 11,<br>13 | 11,<br>12 | 11,<br>12 | 16,<br>16        | 6,<br>9.3   | X, Y | 11,<br>11 | 9, 12     |
| 21 | 0.61(22/36) | CRL-2555 | Panc 04.03             | 11,<br>11 | 11,<br>12 | 8, 12     | 11,<br>12 | 14,<br>16        | 9.3,<br>9.3 | X, X | 10,<br>11 | 12,<br>12 |
| 22 | 0.61(22/36) | CRL-3005 | NCEB-1                 | 9, 11     | 12,<br>12 | 10,<br>11 | 9, 10     | 14,<br>18        | 6,<br>9.3   | X, X | 11,<br>11 | 12,<br>13 |
| 23 | 0.61(22/36) | CRL-7193 | Hs 228.T               | 11,<br>12 | 8, 9      | 10,<br>11 | 11,<br>12 | 14,<br>18        | 8,<br>9.3   | X, X | 8, 11     | 11,<br>12 |
| 24 | 0.61(22/36) | HTB-107  | SW579 [SW 579, SW-579] | 11,<br>11 | 13,<br>13 | 8, 9      | 11,<br>11 | 14,<br>18        | 8,<br>9.3   | X, X | 8, 10     | 13,<br>13 |
| 25 | 0.61(22/36) | IFO50350 | Hs68                   | 8, 11     | 11,<br>13 | 11,<br>12 | 11,<br>12 | 16,<br>16        | 6,<br>9.3   | X, Y | 11,<br>11 | 9, 12     |
| 26 | 0.61(22/36) | IFO50436 | KS-1                   | 8, 12     | 11,<br>13 | 11,<br>11 | 11,<br>12 | 14,<br>18        | 6, 9        | X, X | 8, 11     | 10,<br>12 |
| 27 | 0.61(22/36) | RCB0210  | HF19                   | 11,<br>12 | 9, 13     | 11,<br>12 | 13,<br>14 | 14,<br>18        | 6, 7        | X, X | 8, 11     | 10,<br>13 |
| 28 | 0.61(22/36) | RCB2352  | 633                    | 11,<br>11 | 11,<br>11 | 8, 11     | 11,<br>12 | 14,<br>14        | 8,<br>9.3   | X, X | 8, 11     | 10,<br>12 |
| 29 | 0.59(22/37) | JCRB0183 | QGP-1                  | 12,<br>12 | 13,<br>13 | 12,<br>12 | 10,<br>12 | 14,<br>17,<br>18 | 6, 9        | X, X | 8, 11     | 10,<br>12 |
| 30 | 0.56(20/36) | 41       | LP-1                   | 11,<br>11 | 12,<br>12 | 11,<br>12 | 11,<br>12 | 17,<br>17        | 7, 8        | X, X | 11,<br>11 | 11,<br>12 |
