# Supplementary material for: DDK/Hsk1 phosphorylates and targets fission yeast histone deacetylase Hst4 for degradation to stabilize stalled DNA replication forks
Source: eLife journal article supplement (doi:10.7554/elife.70787), 2021-10-05

Figure 4-figure supplement 1-source data 1

Figure 4-figure supplement 1A

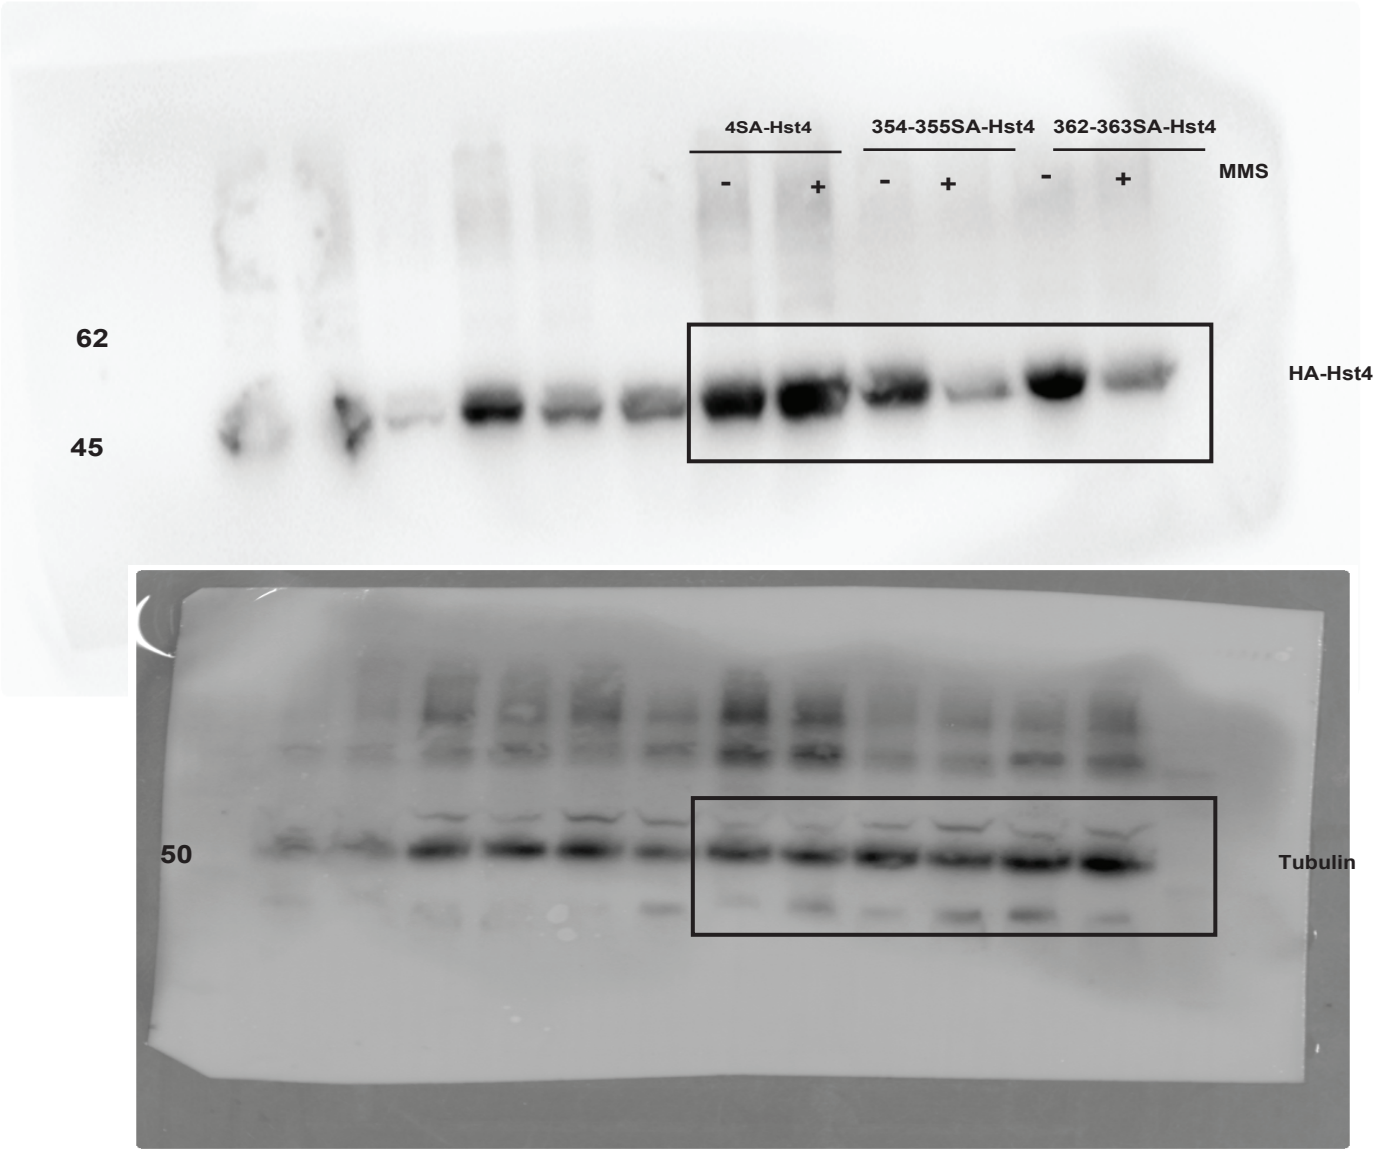

Figure 4-supplemental 1-source data 1

Figure 4-figure supplement 1B

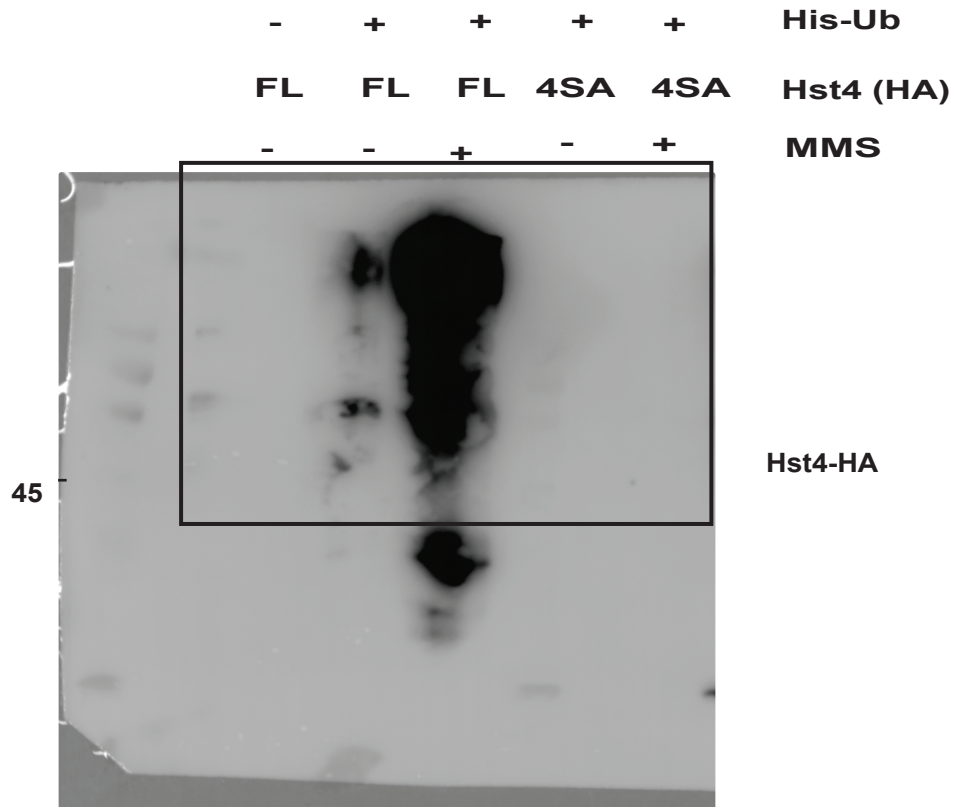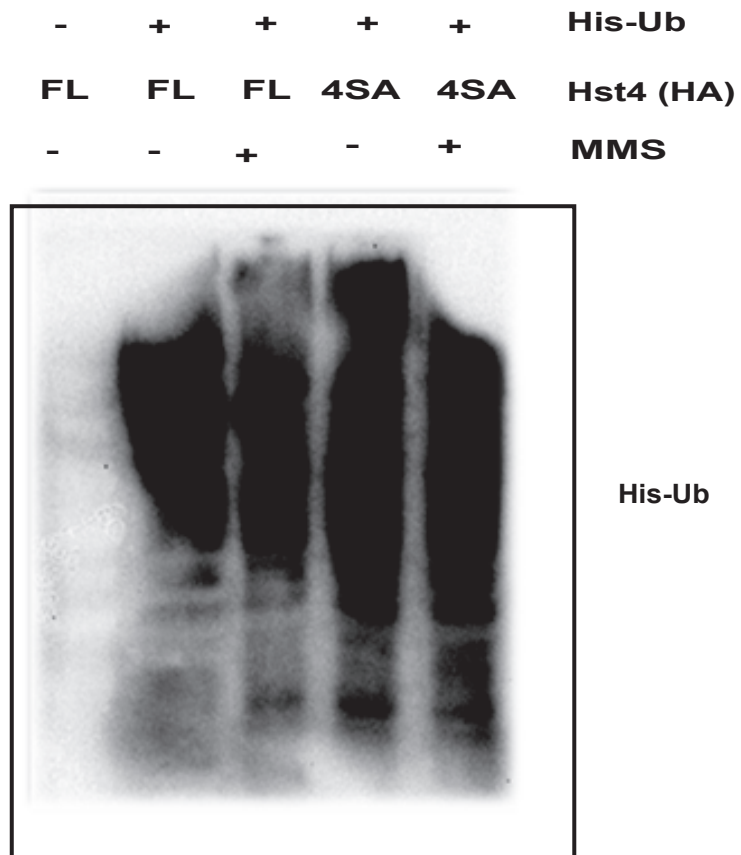

Supplement: fig4-figsupp1-data1 [file elife-70787-fig4-figsupp1-data1-v2.pdf]
